1 **Full title: Automated, miniaturized, and scalable screening of healthcare workers, first**  
2 **responders, and students for SARS-CoV-2 in San Diego County**

3  
4 **Short title: High-throughput screening for SARS-CoV-2**

5  
6 **Authors:**

7 Sydney C Morgan<sup>1,13,¶</sup>, Stefan Aigner<sup>1,4,31,¶</sup>, Catelyn Anderson<sup>14,¶</sup>, Pedro Belda-Ferre<sup>3,31,¶</sup>, Peter  
8 De Hoff<sup>1,13,31,¶</sup>, Clarisse A Marotz<sup>3,31,¶</sup>, Shashank Sathe<sup>1,4,31,¶</sup>, Mark Zeller<sup>14,¶</sup>, Noorsher Ahmed<sup>1,4</sup>,  
9 Xaver Audhya<sup>21</sup>, Nathan A Baer<sup>31</sup>, Tom Barber<sup>31</sup>, Bethany Barrick<sup>18</sup>, Lakshmi Batachari<sup>9</sup>,  
10 Maryann Betty<sup>2,3,31</sup>, Steven M Blue<sup>1,4</sup>, Brent Brainard<sup>7</sup>, Tyler Buckley<sup>27</sup>, Jamie Case<sup>18</sup>, Anelizze  
11 Castro-Martinez<sup>31</sup>, Marisol Chacón<sup>31</sup>, Willi Cheung<sup>1,5,31</sup>, LaVonnye Chong<sup>2</sup>, Nicole G  
12 Coufal<sup>1,2,3,30</sup>, Evelyn S Crescini<sup>31</sup>, Scott DeGrand<sup>2</sup>, David P Dimmock<sup>30</sup>, J Joelle Donofrio-  
13 Odmann<sup>2,3,6,7</sup>, Emily R Eisner<sup>31</sup>, Mehrbod Estaki<sup>3</sup>, Lizbeth Franco Vargas<sup>31</sup>, Michele Freddock<sup>30</sup>,  
14 Robert M Gallant<sup>21,22,24,25</sup>, Andrea Galmozzi<sup>10</sup>, Nina J Gao<sup>3</sup>, Sheldon Gilmer<sup>2</sup>, Edyta M Grzelak<sup>29</sup>,  
15 Abbas Hakim<sup>31</sup>, Jonathan Hart<sup>10</sup>, Charlotte Hobbs<sup>30</sup>, Greg Humphrey<sup>3,31</sup>, Nadja Ilkenhans<sup>22,26</sup>,  
16 Marni Jacobs<sup>13</sup>, Christopher A Kahn<sup>6,7</sup>, Bhavika K Kapadia<sup>31</sup>, Matthew Kim<sup>1,13</sup>, Sunil Kurian<sup>18</sup>,  
17 Alma L Lastrella<sup>31</sup>, Elijah S Lawrence<sup>31</sup>, Kari Lee<sup>1,4</sup>, Qishan Liang<sup>1,4</sup>, Hanna Liliom<sup>27</sup>, Valentina  
18 Lo Sardo<sup>27</sup>, Robert Logan<sup>7</sup>, Michal Machnicki<sup>31</sup>, Celestine G Magallanes<sup>1,13</sup>, Clarence K  
19 Mah<sup>1,4,8,34</sup>, Denise Malacki<sup>2</sup>, Ryan J Marina<sup>1,4</sup>, Christopher Marsh<sup>18</sup>, Natasha K Martin<sup>33</sup>,  
20 Nathaniel L Matteson<sup>14</sup>, Daniel J Maunder<sup>31</sup>, Kyle McBride<sup>2</sup>, Bryan McDonald<sup>22</sup>, Michelle  
21 McGraw<sup>14</sup>, Audra R Meadows<sup>32</sup>, Michelle Meyer<sup>18</sup>, Amber L Morey<sup>1,4,5</sup>, Jasmine R Mueller<sup>1,4</sup>,  
22 Toan T Ngo<sup>31</sup>, Julie Nguyen<sup>14</sup>, Viet Nguyen<sup>14</sup>, Laura J Nicholson<sup>10,11</sup>, Alhakam Nouri<sup>31</sup>, Victoria  
23 Nudell<sup>27</sup>, Eugenio Nunez<sup>31</sup>, Kyle O'Neill<sup>7</sup>, R Tyler Ostrander<sup>31</sup>, Priyadarshini Pantham<sup>1,13</sup>,  
24 Samuel S Park<sup>1,4</sup>, David Picone<sup>7</sup>, Ashley Plascencia<sup>31</sup>, Isaraphorn Pratumchai<sup>14</sup>, Michael  
25 Quigley<sup>19</sup>, Michelle Franc Ragsac<sup>4,34</sup>, Andrew C Richardson<sup>2</sup>, Refugio Robles-Sikisaka<sup>14</sup>,  
26 Christopher A Ruiz<sup>31</sup>, Justin Ryan<sup>2</sup>, Lisa Sacco<sup>2</sup>, Sharada Saraf<sup>14</sup>, Phoebe Seaver<sup>31</sup>, Leigh  
27 Sewall<sup>23</sup>, Elizabeth W Smoot<sup>31</sup>, Kathleen M Sweeney<sup>2</sup>, Chandana Tekkattē<sup>1,13</sup>, Rebecca Tsai<sup>31</sup>,  
28 Holly Valentine<sup>1,13</sup>, Shawn Walsh<sup>23</sup>, August Williams<sup>28</sup>, Min Yi Wu<sup>31</sup>, Bing Xia<sup>31</sup>, Brian Yee<sup>1,4</sup>,  
29 Jason Z Zhang<sup>12</sup>, Kristian G Andersen<sup>14,15\*</sup>, Lauge Farnaes<sup>3,30\*</sup>, Rob Knight<sup>3,16,17\*</sup>, Gene W  
30 Yeo<sup>1,4\*</sup>, Louise C Laurent<sup>1,13\*</sup>

31  
32 ¶ These authors contributed equally to this work.

33 \*Senior authors.

34  
35  
36 **Affiliations:**

37 <sup>1</sup>Sanford Consortium of Regenerative Medicine, University of California San Diego, La Jolla, CA

38 <sup>2</sup>Rady Children's Hospital, San Diego, CA

39 <sup>3</sup>Department of Pediatrics, University of California San Diego, La Jolla, CA

40 <sup>4</sup>Dept of Cellular and Molecular Medicine, University of California San Diego, La Jolla, CA

41 <sup>5</sup>San Diego State University, San Diego, CA

42 <sup>6</sup>Department of Emergency Medicine, University of California San Diego, San Diego, CA

43 <sup>7</sup>San Diego Fire-Rescue Department

- 44 <sup>8</sup>Division of Medical Genetics, Department of Medicine, University of California San Diego, La  
45 Jolla, CA
- 46 <sup>9</sup>Department of Medicine, University of California San Diego, La Jolla, CA
- 47 <sup>10</sup>Department of Molecular Medicine, Scripps Research, La Jolla, CA
- 48 <sup>11</sup>Department of Medicine, Scripps Clinic, La Jolla, CA
- 49 <sup>12</sup>Department of Bioengineering, University of California San Diego, La Jolla, CA
- 50 <sup>13</sup>Department of Obstetrics, Gynecology, and Reproductive Sciences, University of California  
51 San Diego, USA
- 52 <sup>14</sup>Department of Immunology and Microbiology, The Scripps Research Institute, La Jolla, CA,  
53 USA
- 54 <sup>15</sup>Scripps Research Translational Institute, La Jolla, CA, USA
- 55 <sup>16</sup>Department of Computer Science and Engineering, University of California San Diego, La  
56 Jolla, CA, USA
- 57 <sup>17</sup>Department of BioEngineering, University of California San Diego, La Jolla, CA, USA
- 58 <sup>18</sup>Scripps Clinic Bio-Repository and Bio-Informatics Core, Scripps Clinic, La Jolla, CA
- 59 <sup>19</sup>Department of Pathology, Scripps Clinic, La Jolla, CA
- 60 <sup>20</sup>University of California San Diego School of Medicine
- 61 <sup>21</sup>Division of Biological Sciences, University of California San Diego, La Jolla, CA
- 62 <sup>22</sup>NOMIS Center for Immunobiology and Microbial Pathogenesis, Salk Institute for Biological  
63 Studies, La Jolla, CA
- 64 <sup>23</sup>Departments of Integrative Structural and Computational Biology and Chemistry, The Scripps  
65 Research Institute, La Jolla, CA, USA
- 66 <sup>24</sup>Molecular and Systems Physiology Lab, Salk Institute for Biological Studies, La Jolla, CA,  
67 USA
- 68 <sup>25</sup>Gene Expression Lab, Salk Institute for Biological Studies, La Jolla, CA, USA
- 69 <sup>26</sup>Ruperto Carola University, Heidelberg, Germany
- 70 <sup>27</sup>Department of Neuroscience and Dorris Neuroscience Center, Scripps Research, La Jolla, CA
- 71 <sup>28</sup>Department of Dermatology, University of California San Diego, La Jolla, CA
- 72 <sup>29</sup>Department of Chemistry, Scripps Research, La Jolla, CA
- 73 <sup>30</sup>Rady Children's Institute for Genomic Medicine
- 74 <sup>31</sup>Expedited COVID Identification Environment (EXCITE) Laboratory, Department of Pediatrics,  
75 University of California San Diego, La Jolla, CA
- 76 <sup>32</sup>Perinatal neonatal quality improvement network of Massachusetts, March of Dimes  
77 Foundation, Westborough, MA
- 78 <sup>33</sup>Division of Infectious Diseases and Global Public Health, University of California San Diego,  
79 La Jolla, CA
- 80 <sup>34</sup>Bioinformatics & Systems Biology Program, University of California San Diego, La Jolla, CA
- 81
- 82
- 83
- 84
- 85
- 86
- 87

## 88 **Abstract**

89 **Background:** Successful containment strategies for SARS-CoV-2, the causative virus of the  
90 COVID-19 pandemic, have involved widespread population testing that identifies infections early  
91 and enables rapid contact tracing. In this study, we developed a rapid and inexpensive RT-  
92 qPCR testing pipeline for population-level SARS-CoV-2 detection, and used this pipeline to  
93 establish a clinical laboratory dedicated to COVID-19 testing at the University of California San  
94 Diego (UCSD) with a processing capacity of 6,000 samples per day and next-day result  
95 turnaround times.

96 **Methods and findings:** Using this pipeline, we screened 6,786 healthcare workers and first  
97 responders, and 21,220 students, faculty, and staff from UCSD. Additionally, we screened 6,031  
98 preschool-grade 12 students and staff from public and private schools across San Diego County  
99 that remained fully or partially open for in-person teaching during the pandemic. Between April  
100 17, 2020 and February 5, 2021, participants provided 161,582 nasal swabs that were tested for  
101 the presence of SARS-CoV-2. Overall, 752 positive tests were obtained, yielding a test positivity  
102 rate of 0.47%. While the presence of symptoms was significantly correlated with higher viral  
103 load, most of the COVID-19 positive participants who participated in symptom surveys were  
104 asymptomatic at the time of testing. The positivity rate among preschool-grade 12 schools that  
105 remained open for in-person teaching was similar to the positivity rate at UCSD and lower than  
106 that of San Diego County, with the children in private schools being less likely to test positive  
107 than the adults at these schools.

108 **Conclusions:** Most schools across the United States have been closed for in-person learning  
109 for much of the 2020-2021 school year, and their safe reopening is a national priority. However,  
110 as there are no vaccines against SARS-CoV-2 currently available to the majority of school-aged  
111 children, the traditional strategies of mandatory masking, physical distancing, and repeated viral  
112 testing of students and staff remain key components of risk mitigation in these settings. The

113 data presented here suggest that the safety measures and repeated testing actions taken by  
114 participating healthcare and educational facilities were effective in preventing outbreaks, and  
115 that a similar combination of risk-mitigation strategies and repeated testing may be successfully  
116 adopted by other healthcare and educational systems.

117

118 **Key words:** SARS-CoV-2; COVID-19; viral load; symptoms; testing; population; age; sex;  
119 demographics

120

## 121 **Introduction**

122 Coronavirus Disease 2019 (COVID-19) is a serious respiratory illness caused by the  
123 Severe Acute Respiratory Syndrome Coronavirus 2 (SARS-CoV-2). The COVID-19 pandemic  
124 has had a dramatic and negative impact on the health, well-being, and productivity of  
125 communities around the world, with over 165 million confirmed cases and 3.4 million deaths  
126 worldwide, including more than 33 million confirmed cases and 587,000 deaths in the United  
127 States (US) alone, within the 18 months since this virus was discovered (1).

128 Given the lack of widely available and highly effective preventative or therapeutic agents  
129 besides the recent ramp-up of vaccine availability, social interventions such as “stay-at-home”  
130 orders, temporary school and business closures, and mask-wearing/physical distancing  
131 measures have been enacted in much of the world to slow the spread of the SARS-CoV-2 virus.  
132 While many of these measures are effective at slowing viral spread through a community when  
133 carried out correctly (2–4), they do not completely halt the spread of the virus, nor are they  
134 sustainable long term. Indeed, a major concern in the US and other similarly affected countries  
135 is how to safely reopen schools. Some schools and universities in the US have partially  
136 reopened, using a hybrid of online and in-person teaching, or have fully reopened with  
137 increased safety measures in place. The CDC has recently issued recommendations on how to

138 limit the spread of COVID-19 in schools (<https://www.cdc.gov/coronavirus/2019->  
139 [ncov/community/schools-childcare/operation-strategy.html](https://www.cdc.gov/coronavirus/2019-ncov/community/schools-childcare/operation-strategy.html)), which include universal and correct  
140 use of masks, physical distancing, handwashing, and contact tracing, but, so far, few studies  
141 have investigated how these measures may work in practice in this environment (5–8).

142 The countries that have demonstrated the greatest success in controlling the COVID-19  
143 pandemic, including New Zealand, Australia, and South Korea, have combined risk-mitigating  
144 strategies with large-scale and widespread testing, as well as aggressive contact tracing, to  
145 both identify outbreaks and curb community transmission. Importantly, this broad testing must  
146 be implemented with a minimal turnaround time to allow for effective contact tracing and  
147 isolation of affected persons. Even now, nearly 1.5 years after the initial reports of COVID-19  
148 infections, it can be difficult for many people in the US and other countries to obtain a test for  
149 SARS-CoV-2 if they do not exhibit symptoms or have not been in known contact with a person  
150 with a confirmed case of COVID-19. In the context of overall limited testing capacity, these  
151 measures are intended to allow medical doctors to triage patients into appropriate treatment  
152 pipelines. However, in the context of a pandemic, these measures exclude key demographics,  
153 namely asymptomatic and pre-symptomatic carriers, who contribute to the “silent spread” of the  
154 virus (9,10). Therefore, the current symptom- and contact-based testing strategies employed in  
155 much of the world are both unlikely to accurately capture the full extent to which this novel  
156 coronavirus can spread throughout our communities.

157 Some regions have screened large, representative proportions of their target populations  
158 with great success, and provide an insight into the proportion of COVID-19 cases that may be  
159 missed with current testing restrictions. These studies, which estimate that the rate of  
160 asymptomatic COVID-19 infection may be as high as 40-45%, highlight the importance of  
161 routine asymptomatic testing (11–13). Additionally, we now know that asymptomatic and pre-  
162 symptomatic infections are transmissible (14,15).

163           The objective of this study was to develop and establish an accurate, high-throughput,  
164 rapid, and inexpensive SARS-CoV-2 screening pipeline for use at the population level. To this  
165 end, we performed SARS-CoV-2 screening on over 5,000 healthcare workers from two large  
166 healthcare systems in San Diego County and 1,162 first responders from San Diego Fire and  
167 Rescue. Additionally, we screened 21,220 students, faculty, and staff from the University of  
168 California, San Diego (UCSD), and 6,031 students and staff from preschool-grade 12 schools  
169 across San Diego County that had remained fully or partially open for in-person teaching  
170 throughout the COVID-19 pandemic (4,750 from 11 private schools and 1,281 from 13 public  
171 schools). We developed a RT-qPCR testing pipeline that included the miniaturization of a  
172 testing kit that was granted Emergency Use Authorization by the U.S. Food and Drug  
173 Administration. This pipeline was then used to establish a Clinical Laboratory Improvement  
174 Amendments (CLIA) certified laboratory at UCSD, and further refinements were made to  
175 increase throughput capacity to 6,000 samples per day with next-day results, and to enable  
176 accurate detection from self-collected anterior-nares swab samples. A secondary objective of  
177 this study was to identify asymptomatic and pre-symptomatic infections, and to evaluate the  
178 effectiveness of health and safety measures implemented by healthcare and educational  
179 facilities in response to the COVID-19 pandemic, particularly those developed at educational  
180 facilities to safely re-open schools for in-person learning.

181

## 182 **Methods**

### 183 **SEARCH Study**

184           The SEARCH study (San Diego Epidemiology and Research Study for CCOVID-19  
185 Hhealth) was a multi-site study whose aim was to evaluate the presence of COVID-19 infection in  
186 potentially exposed healthcare worker and first responder populations in San Diego County (SD  
187 County). In particular, employees from Rady Children’s Hospital San Diego (RCHSD), Rady

188 Children's Institute for Genomic Medicine (RCIGM), Scripps Health, and the San Diego Fire-  
189 Rescue Department (SDFD) were screened, along with a small number of employees from  
190 other institutions who heard of the study by word of mouth and were allowed to participate.  
191 These other institutions included the University of California, San Diego (UCSD), Children's  
192 Primary Care Medical Group, Rady Children's Specialists of San Diego, and Sharp HealthCare.  
193 Screening took place from April 17 through June 30, 2020. Nasopharyngeal (NP) swabs were  
194 obtained from study participants by trained healthcare workers, and RT-qPCR testing was  
195 performed in collaborating basic science labs at UCSD and Scripps Research to test for the  
196 presence of SARS-CoV-2 in the samples. Participant samples that tested positive using the  
197 research lab screening protocol were subjected to confirmatory clinical tests, at which point the  
198 positive results were reported to both the survey participant and the SD County Department of  
199 Public Health. The members of the research team had final responsibility for the survey design,  
200 clinical protocol, and trial oversight. The UCSD Institutional Review Boards (IRB) provided  
201 human subject protection oversight of the SEARCH study (IRB approval #200470).

## 202 **Nasopharyngeal swab production**

203       Due to a shortage of NP swabs when the SEARCH study began, 3D-printed swabs were  
204 designed and printed for testing. The swab shafts were 3D-printed in nylon, utilizing material  
205 extrusion (i.e. fused filament fabrication) on an Onyx One Professional Desktop 3D Printer  
206 (Markforged, Watertown, MA, USA). The nylon swab tips were wrapped with rayon fibers and  
207 steam-sterilized. While rayon fibers have previously been found to be slightly inferior to flocked  
208 nylon (16), they were readily available and more easily manufactured in this setting.

209       We validated the performance of these 3D-printed swabs in parallel with commercially  
210 available NP swabs (FLOQSwab, Copan Diagnostics Inc., Murrieta, CA, USA), using both a  
211 commercially available standard viral respiratory panel in pediatric patients, as well as SARS-  
212 CoV-2 testing in known positive adult patients. The detailed protocol and complete validation



213 information has been made available on protocols.io (17). Briefly, at Rady Children’s Hospital  
214 San Diego (RCHSD, CA, USA), 25 pediatric patients were swabbed by respiratory therapists  
215 using both the 3D-printed swabs and the commercially-sourced swabs, of which 22 samples  
216 were run on the ePlex Respiratory Pathogen (RP) Panel (GenMark Dx, Carlsbad, CA, USA),  
217 which test for viruses including adenovirus, human metapneumovirus, respiratory syncytial virus  
218 (RSV), and variants of influenza and parainfluenza. The remaining three samples, two negative  
219 and one positive for SARS-CoV-2, were analyzed using the Simplexa COVID-19 Direct Kit  
220 (DiaSorin Molecular, Cypress, CA, USA). Finally, nine adult outpatients who had previously  
221 tested positive for SARS-CoV-2 using various FDA-approved tests performed self-swabs 3 to 14  
222 days later, some patients with paired parallel commercial and 3D printed swabs ( $n = 4$ ) and  
223 others with the 3D-printed swabs alone ( $n = 5$ ). Results from the 3D-printed swab validation are  
224 presented in Table S1.

## 225 **Sample collection and population screening**

226 Inclusion criteria for this study included: (1) Individuals 18 years of age or older with  
227 possible exposure to COVID-19 in a work setting. Exclusion criteria included: (1) individuals  
228 from whom it was not possible to obtain an adequate nasopharyngeal swab; (2) individuals who  
229 needed immediate medical intervention.

230 In an effort to include healthcare workers throughout SD County, multiple study sites at  
231 hospitals and clinics were set up; each study site was staffed by individuals from that hosting  
232 location. A fixed testing location was set up at RCHSD and a mobile testing unit was created to  
233 serve nine Scripps Health locations (Scripps Green Hospital; Scripps Memorial La Jolla  
234 Hospital; Scripps Memorial Encinitas Hospital; Scripps Mercy San Diego Hospital; Scripps  
235 Mercy Chula Vista Hospital; Scripps Clinic Rancho Bernardo; Scripps Coastal Vista Center;  
236 Scripps Clinic Mission Valley; and Scripps Campus Point).



237 Potential healthcare worker participants were informed of the study through an  
238 organizational all-user email communication as well as a flyer that was sent to Rady and  
239 Scripps Health employees and which contained a QR code that allowed them to fill out an  
240 electronic consent form and symptom questionnaire prior to arrival at a study site using  
241 REDCap (Research Electronic Data Capture) software hosted at RCHSD. REDCap is a secure,  
242 web-based software platform designed to support data capture for research studies (18,19).  
243 Paper versions of these forms were also available at the study site if an eligible participant was  
244 not able to complete them electronically. Potential firefighter and lifeguard participants were  
245 informed of the study through an assignment that was posted to every SDFD worker on their  
246 Target Solutions (Vector Solutions, Tampa, FL, USA) accounts. Target Solutions is an online  
247 training management system which requires assignments to be opened, read, and confirmed  
248 prior to the assignment deadline, to ensure all personnel receive and acknowledge their  
249 contents. The assignment contained the details of the study as well as instructions on how to  
250 participate. In this way, all firefighters and lifeguards in the SDFD were informed of this study.

251 Potential participants were then asked to complete a three-question quiz: (1) Is  
252 participation in this study voluntary? (Answer: yes); (2) Will participants be told about their study  
253 findings? (Answer: not necessarily); (3) Is participating in this study the same as receiving a  
254 clinical test? (Answer: no). Those who answered any questions incorrectly were re-educated by  
255 study staff prior to final enrollment and the collection of samples. The Enrollment Screening  
256 Form - completed either electronically using a secure REDCap survey, or using a paper version  
257 - collected identifiable information including name, address, contact phone number, date of  
258 birth, workplace information, and date and site of testing, in addition to information regarding  
259 comorbidities and any active symptoms on the day of testing. A barcode was entered into an  
260 electronic data capture file for each participant with matching labels placed on a participant  
261 information sheet as well as on the NP swab collection tube, in order to link each sample with  
262 the participant. A barcode-associated "synthetic name" was also generated, and was cross-

263 checked with each participant at registration and again at the swabbing station to prevent  
264 sample mix-up. Protected health information (PHI) was not provided to the research testing  
265 laboratories. Instead, names and identifiable information were stored on REDCap at RCHSD, as  
266 specified in the IRB protocol (IRB approval #200470).

267 An NP swab sample was collected from each participant by sampling the posterior  
268 nasopharynx through both nares, according to instructions for NP swab collection from the CDC  
269 (<https://www.cdc.gov/flu/pdf/professionals/flu-specimen-collection-poster.pdf>). A qualified team  
270 member with appropriate personal protective equipment (PPE), consisting of gown, gloves, N95  
271 respirator, and face shield, obtained the sample and placed the NP swab into the barcode-  
272 labeled collection tube containing 3 mL viral transport medium (VTM), which was prepared  
273 according to CDC guidelines ([https://www.cdc.gov/coronavirus/2019-ncov/downloads/Viral-](https://www.cdc.gov/coronavirus/2019-ncov/downloads/Viral-Transport-Medium.pdf)  
274 [Transport-Medium.pdf](https://www.cdc.gov/coronavirus/2019-ncov/downloads/Viral-Transport-Medium.pdf)). At the end of each sampling day, samples were transported on wet ice  
275 in a cooler to a Biosafety Laboratory 2 Plus (BSL-2+) laboratory at Scripps Research (La Jolla,  
276 CA, USA) for sample accessioning and plating, as described in the Sample processing, RNA  
277 extraction, and RT-qPCR section below.

278 At RCHSD, NP sample collection of healthcare workers and firefighters for this study  
279 involved 192 screening hours over 33 sampling days, between April 17 and June 30, 2020, with  
280 two registered nurses (RNs) involved in consenting participants for the study, two respiratory  
281 therapists involved in swabbing participants, and two additional RNs acting as support staff  
282 involved in participant information data entry and specimen handling support, for a total of six  
283 healthcare workers at each screening site on each day. Across all the Scripps Health locations,  
284 NP sample collection for this study involved 76 screening hours over 20 sampling days,  
285 between April 24 and June 30, 2020. The mobile sample collection team increased from six to  
286 ten staff (four additional support staff for data entry and specimen handling) for locations with  
287 high demand. For the SDFD employees, NP samples were collected at the permanent sampling  
288 location at RCHSD between June 1 and June 30, 2020.

289

## 290 **INSPECT application development**

291           Specimens and results were tracked through the processing pipeline using the INSPECT  
292 (Instant Service Platform for Emergency CCOVID-19 Tests) application. This Laboratory  
293 Information Management System (LIMS) was designed specifically for tracking SARS-CoV-2  
294 tests, and includes tracking of specimen ID, plate layouts, plate barcodes, RT-qPCR test  
295 results, and participant IDs. All code and protocols needed to create a lab-tailored version of the  
296 INSPECT app are freely available on GitHub (<https://github.com/SEARCH-Alliance/inspect>) and  
297 protocols.io (20).

## 298 **SEARCH sample processing, RNA extraction, and RT-qPCR**

299           Sample processing and viral RNA extraction was performed using a KingFisher™ Flex  
300 automated sample preparation machine (Thermo Fisher, Waltham, MA, USA) and an Eppendorf  
301 epMotion® 5070 automated liquid handling workstation (Enfield, CT, USA). RNA was extracted  
302 with the Omega Bio-tek Mag-Bind Viral DNA/RNA kit. A detailed protocol of the RNA extraction  
303 process used in the SEARCH study is available on protocols.io (21). Following RNA extraction  
304 of samples, SARS-CoV-2 detection was performed using a miniaturized and automated RT-  
305 qPCR procedure. Viral RNA was detected using the TaqPath COVID-19 Combo Kit  
306 (ThermoFisher Scientific, Waltham, MA, USA). This viral RNA detection kit is approved by the  
307 Emergency Use Authorization (EUA) authority of the US FDA for the detection of SARS-CoV-2,  
308 and targets three regions of the SARS-CoV-2 genome - N gene, S gene, and ORF1ab gene - as  
309 well as an internal positive control, MS2. The miniaturization of the RT-qPCR process (from the  
310 standard 25 µL to a 3 µL reaction volume) involved the use of two Mosquito robotic liquid  
311 handlers (STP Labtech Ltd., formerly TTP Labtech Ltd., Boston, MA, USA): a 16-channel liquid  
312 handler (HV Genomics), and an HV X1 hit/cherry picker single-channel liquid handler. RT-qPCR  
313 was performed on a QuantStudio™ 5 Real-Time PCR System (Applied Biosystems). A detailed

314 protocol of the miniaturized and automated RT-qPCR process used in this study is available on  
315 protocols.io (22). Using the TaqPath COVID-19 Multiplex Real-Time RT-PCR Assay, samples  
316 are considered positive when at least two out of three viral target genes (S gene, N gene, and  
317 ORF1ab) amplify using a threshold cycle (Ct) of 37 cycles, and samples are considered  
318 negative when none of the three viral target genes amplify but the internal control (MS2) does  
319 amplify. Inconclusive test results are those in which only one of three viral target genes  
320 amplifies, while invalid tests are those in which no viral target genes amplify, and the internal  
321 control also fails to amplify. Samples that produced inconclusive and invalid results from the  
322 initial analysis were re-extracted and re-amplified, and the decision tree recommended by the  
323 manufacturer (Thermo Fisher) was used to determine the final result; data presented here are  
324 the final results obtained after re-extraction and re-amplification, in cases where this was  
325 necessary.

## 326 **Validation of RT-qPCR miniaturization and research workflow**

327 A technical validation of the RT-qPCR miniaturization was performed by comparing the  
328 miniaturization reactions to full-scale reactions. RT-qPCR performance of the miniaturized  
329 reactions was compared to published results for full-scale reactions to evaluate equivalency (Fig  
330 S1). The limit of detection (LOD) was calculated for the miniaturized reactions using two  
331 different methods: (1) SARS-CoV-2 viral RNA was spiked into the RT-qPCR reaction in different  
332 concentrations (1-128 viral genome equivalents per reaction) along with RNA extracted from  
333 negative NP control samples; (2) SARS-CoV-2 viral RNA was spiked into negative NP control  
334 samples in lysis buffer, before RNA extraction, in different concentrations (1-100,000 viral  
335 genome equivalents/mL input sample) (Fig S2). RT-qPCR performance of the miniaturized  
336 reactions were found to be equivalent to the full-scale reactions (Fig S1). The limit of detection  
337 for the miniaturized reactions (using the evaluation criteria recommended by the manufacturer,

338 and requiring all three replicates to show a positive result) was found to be 500 viral RNA  
339 copies/mL input sample, with >4 viral RNA copies per RT-qPCR reaction (Fig S2).

340 Samples that tested positive through the research pipeline were subjected to  
341 confirmatory clinical tests by a collaborating Clinical Laboratory Improved Amendments (CLIA)  
342 lab at UCSD. A number of negative samples were also sent to the collaborating CLIA lab to  
343 confirm their negative status as determined through the research pipeline. In total, 21 positive  
344 and 141 negative samples obtained through the research pipeline were re-tested by the  
345 collaborating CLIA lab: all 141 negative samples were confirmed negative, and 18/21 positive  
346 samples were confirmed as true positives, with 3/21 samples returning a false-positive result.  
347 The true positives were reported to the study participants and the SD County Public Health  
348 Department.

## 349 **EXCITE Lab**

350 After the SEARCH study (the initial proof-of-concept study) was complete, the  
351 methodology developed by the SEARCH team was adapted to establish the Expedited COVID-  
352 19 Identification Environment (EXCITE) lab, a CLIA-certified laboratory at UCSD dedicated to  
353 COVID-19 testing. The EXCITE lab was developed to provide rapid, asymptomatic population  
354 screening for UCSD students/faculty/staff, and also partnered with local public and private  
355 preschool-grade 12 schools and SDFD to test their populations. The UCSD Institutional Review  
356 Boards (IRB) provided human subject protection oversight of the data obtained by the EXCITE  
357 lab (IRB approval #210817X).

## 358 **Translation of the research workflow into the CLIA environment**

359 The research workflow from the SEARCH study was adapted for clinical use by the  
360 EXCITE lab, with the goal of repeated screening of large populations as a component of  
361 programs developed to safely increase educational and business activities during the COVID-19  
362 pandemic. Five major changes to the SEARCH pipeline were implemented by the EXCITE lab

363 to improve patient acceptability, enhance the safety of testing personnel, increase assay  
364 throughput, ensure compliance with College of American Pathologists (CAP) and CLIA  
365 regulations, and enable reporting of clinical results to patients' medical records and to the  
366 required public health agencies.

367 First, we validated anterior nares (AN) sample collection via self-swabbing. NP swabs  
368 are considered the gold standard sample type used to test for SARS-CoV-2. However, these  
369 swabs are uncomfortable for the patient and require collection by a clinical provider at close  
370 proximity, which decreases compliance and increases cost and risk, making it infeasible for  
371 large-scale repeated screening programs. Anterior nares swabs can be self-collected with  
372 minimal discomfort, while providing comparable test results.

373 Second, to enable safer handling of large numbers of samples, we changed from sample  
374 collection in VTM, in which viral particles remain infectious, to PrimeStore® Molecular Transport  
375 Medium (MTM), which immediately inactivates the SARS-CoV-2 virus. Following validation with  
376 MTM, we additionally validated sample collection in Mawi DNA Technologies iSWAB  
377 Microbiome buffer (Mawi) as well as 5% sodium dodecyl sulfate (SDS). AN swabs in MTM,  
378 Mawi, and SDS are referred to here as "ANM", "ANW", and "AND", respectively. All three media  
379 types inactivate the virus, allowing for self-collection and safer handling, but Mawi and SDS  
380 have the additional benefit of being non-toxic substances, allowing for unsupervised self-  
381 collection of samples.

382 Third, to increase assay throughput, we centralized our operations from three research  
383 laboratories located ~10 min drive apart into two adjacent rooms in the same building, and  
384 obtained and integrated two Hamilton® Microlab STAR liquid handling systems for automated  
385 accessioning and transfer of samples from collection tubes to 96-well plates prior to RNA  
386 extraction (see "EXCITE sample accessioning, RNA extraction, and RT-qPCR" section below).

387 Fourth, we obtained a CLIA extension from the existing Biochemical Genetics high-  
388 complexity CLIA laboratory in the Department of Pediatrics at UCSD, and established Standard  
389 Operating Procedures for each aspect of the workflow.

390 Finally, we built secure links between the INSPECT application and the UCSD instance  
391 of the EPIC electronic health record, as well as the California Reportable Disease Information  
392 Exchange (CalREDIE) Electronic Lab Reporting (ELR) system, using Redox as the integration  
393 application programming interface (API).

394 These changes were implemented in parallel, allowing us to translate the research  
395 workflow into a clinical assay in only forty days. The EXCITE lab was designed to accommodate  
396 up to 6,000 samples per day with next-day results.

### 397 **Validation of anterior nares samples**

398 We clinically validated our clinical workflow using AN swabs collected in MTM (“ANM”),  
399 Mawi (“ANW”), and 5% SDS (“AND”). First, we performed a technical validation by determining  
400 the LOD of all three sample types using contrived samples with a range of SARS-CoV-2 viral  
401 particle (VP) concentrations, from 250 VP/mL up to 32,000 VP/mL, with each test performed in  
402 triplicate. We demonstrated that the sensitivity of our clinical workflow is excellent, with a  
403 technical LOD of 500 VP/mL for MTM and 250 VP/mL for Mawi and SDS (Table S2). Next, a  
404 second technical validation was performed using contrived samples containing 1,000 VP/mL; a  
405 minimum of 20 replicate samples were run per sample type, and a minimum of 19/20 were  
406 required to return a positive result via RT-qPCR (see “EXCITE sample accessioning, RNA  
407 extraction, and RT-qPCR” section below). All ANM and AND replicates returned a positive  
408 result, and 19/20 ANW replicates returned a positive result (Table S3). Last, we performed  
409 clinical validation on all three sample types, first validating ANM samples and then using the  
410 validated ANM as a comparator to clinically validate ANW and AND. We used remnant AN  
411 samples collected in MTM from 30 positive cases and 32 negative cases, kindly provided by



412 Helix OpCo, LLC (San Diego, CA, USA). These samples had previously been tested/validated  
413 by Helix under their EUA (<https://www.fda.gov/media/140420/download>), and the test results  
414 obtained from Helix were used as the comparator for our results (Table S4). Following ANM  
415 validation and EUA authorization, we validated ANW and AND sample types with clinically-  
416 obtained positive and negative cases for SARS-CoV-2, and using the recently-validated ANM  
417 sample type as the comparator. Clinical validation required a minimum of 90% compliance  
418 between the EUA authorized comparator and the experimental sample types on the same  
419 samples. For ANW, 34 positives and 54 negatives were tested, and for AND, 38 positives and  
420 55 negatives were tested (Table S4). The sensitivity (the ability of the test to correctly identify  
421 positives), specificity (the ability of the test to correctly identify negatives), and accuracy (overall  
422 probability that a test is correct) for each sample type can be seen in Table 1.

423  
424 **Table 1.** Sensitivity, specificity, and accuracy of anterior nares swabs in MTM (ANM), Mawi  
425 (ANW), or 5% SDS (AND) media, tested for the presence of SARS-CoV-2 during clinical  
426 validation. Numbers in brackets are 95% confidence intervals.

|            | <b>Sensitivity</b>     | <b>Specificity</b> | <b>Accuracy</b>        |
|------------|------------------------|--------------------|------------------------|
| <b>ANM</b> | 100% (88.43 - 100)     | 100% (89.11 - 100) | 100% (94.22 - 100)     |
| <b>ANW</b> | 100% (89.11 - 100)     | 100% (93.40 - 100) | 100% (95.80 - 100)     |
| <b>AND</b> | 94.59% (81.81 - 99.34) | 100% (93.40 - 100) | 97.80% (92.29 - 99.73) |

## 427 428 **EXCITE sample collection**

429 Self-swabbed anterior nares (AN) samples were collected using nylon flocked swabs  
430 ([https://renonlab.en.made-in-china.com/product/zKEnIjuyEdrC/China-Medical-Virus-Test-  
431 Collection-Nylon-Flocked-Nasopharyngeal-Nasal-Swabs.html](https://renonlab.en.made-in-china.com/product/zKEnIjuyEdrC/China-Medical-Virus-Test-Collection-Nylon-Flocked-Nasopharyngeal-Nasal-Swabs.html)), which were placed in tubes  
432 containing 1 mL of either MTM, Mawi, or 5% SDS. All participants >12 years of age self-  
433 collected samples, and children 12 years of age or younger in participating schools had samples  
434 collected by trained staff at each school. Sample collection occurred on-site at participating fire  
435 departments and schools, and all samples were sent daily to the EXCITE lab for testing. For  
436 UCSD participants, sample test kits were available in dedicated vending machines throughout

437 campus, with sample drop sites located next to the vending machines that were collected  
438 multiple times per day for testing by the EXCITE lab. EXCITE samples reported in this study  
439 were collected between September 15, 2020 and February 5, 2021.

## 440 **EXCITE sample accessioning, RNA extraction, and RT-qPCR**

441 The workflow of the EXCITE lab was modeled after the SEARCH study, but updated and  
442 further automated to increase throughput. Sample accessioning was performed using  
443 Hamilton® Microlab STAR liquid handling systems. RNA was extracted using the MagMax Viral  
444 Pathogen (MVPII) kit, and extraction was semi-automated via the use of an epMotion® 5075  
445 liquid handling workstation (Eppendorf) and a KingFisher™ Flex purification system (Thermo  
446 Fisher). A detailed protocol of the semi-automated sample accessioning and RNA extraction  
447 process used by the EXCITE lab is available on protocols.io (23).

448 Viral RNA was detected using the TaqPath COVID-19 Combo Kit (ThermoFisher  
449 Scientific, Waltham, MA, USA). RT-qPCR reaction preparation was performed using a  
450 Mosquito® HV Genomics robotic liquid handler (SPT LabTech), and miniaturized 3 µL RT-  
451 qPCR reactions were performed on a QuantStudio™ 7 Pro Real-Time PCR System (Applied  
452 Biosystems). A detailed protocol of the miniaturized and automated RT-qPCR process used by  
453 the EXCITE lab is available on protocols.io (22). Test results were determined as described  
454 above in the “SEARCH sample processing, RNA extraction, and RT-qPCR” section. Samples  
455 that tested positive through the EXCITE pipeline were re-extracted and re-amplified to confirm  
456 the positive result, and then reported to SD County. EXCITE participants received the results of  
457 every test they submitted, regardless of positivity.

## 458 **Data analysis and visualization**

459 Data curation was conducted in R (version 4.0.3) using the ‘tidyverse’ (version 1.3.0)  
460 package (24) and the associated ‘readr’ (version 1.4.0) package. Statistical analyses including *t*-  
461 tests and Kruskal-Wallis tests were performed in R (version 4.0.3) or Python (version 3.6.11).

462 Chi-square tests and data summaries from Tables 5 and 6 were performed/created using SAS  
463 (version 9.4).

464 Data visualization was accomplished using a combination of R (version 4.0.3), Python  
465 (version 3.6.11), Tableau (Desktop version 2019.2.5 and Server version 2019.2.0), Excel 2010  
466 (version 2103), Inkscape (version 1.0), and Leaflet (version 0.7.7). Figs 1C; S1; S2; S3; and S6  
467 were created in Excel and edited in Inkscape. Figs 1A; 1B; 2; and 4 were created in Tableau  
468 and edited in Inkscape. Figs 3 and 5 were created in Python. Figs 6; 8; S4; S5; and S6 were  
469 created in R using the following packages: 'lubridate' (version 1.7.9.2) (25); 'ggstatsplot' (version  
470 0.7.0) (26); 'ggpubr' (version 0.4.0); 'tidyverse' (version 1.3.0) (24) and the associated packages  
471 'readr' (version 1.4.0), 'readxl' (version 1.3.1), 'ggplot2' (version 3.3.3), and 'ggpubr' (version  
472 0.4.0). Figs 6 and 8 were created in Leaflet (<https://leafletjs.com/>) and OpenStreetMap  
473 (<https://www.openstreetmap.org/copyright>), using coordinate data from zipcodeR package  
474 (<https://cran.r-project.org/web/packages/zipcodeR/index.html>) and Google Maps  
475 (<https://maps.google.com>).

476 Full datasets, as well as scripts for data analysis and visualization used in this  
477 publication, are made available at <https://osf.io/3fguz/>.

478

## 479 **Results and Discussion**

### 480 **Overall Testing Results**

481 Samples were collected for the SEARCH study between April 17 and June 30, 2020,  
482 and by the EXCITE lab between September 15, 2020 and February 5, 2021. The SEARCH  
483 study was designed to screen healthcare workers and first responders from San Diego County  
484 (SD County); in particular, employees from Rady Children's Hospital San Diego (RCHSD), Rady  
485 Children's Institute for Genomic Medicine (RCIGM), Scripps Health, and the San Diego Fire-  
486 Rescue Department (SDFD) were screened, along with a small number of employees from

487 other institutions who heard of the study by word of mouth and were allowed to participate. The  
488 EXCITE lab was designed for repeated screening of UCSD students and employees, but has  
489 also partnered with a number of private and public preschool-grade 12 schools and SDFD to  
490 provide repeated testing of their members. A recent study highlighted the potential positive  
491 implications of institutions expanding their COVID-19 testing efforts to include members of  
492 surrounding communities, which can benefit the institution itself as well as the community as a  
493 whole (27).

494 Both SEARCH and EXCITE included repeat testing of participants; in total, 8,066  
495 nasopharyngeal (NP) swabs were obtained from 6,376 individuals via the SEARCH study, and  
496 153,516 anterior nares (AN) swabs were obtained from 28,293 individuals via the EXCITE lab.  
497 During the time period of this study, the EXCITE lab processed an average of 1,124 samples  
498 per day. Additionally, the average total time from sample barcode scan to return of results was  
499  $15.2 \pm 0.03$  h, with an average of  $6.6 \pm 0.01$  h of in-lab processing time (Fig S3). Results were  
500 returned within 24 h of receipt at the lab for 98.1% of samples, and between 24-60 h for 1.2% of  
501 samples. The latter were largely samples that returned with Inconclusive or Invalid results on  
502 the first analysis run, and were analyzed a second time before reporting a clinical result. We  
503 note that there was a small proportion (0.7%) of samples with processing times >60 h; these  
504 were primarily samples for which the lab did not initially receive the required patient-level  
505 demographic information to report a clinical result, and therefore needed to request additional  
506 information from the ordering healthcare provider prior to returning results.

507 The breakdown of test results by sample type is presented in Table 2. In the SEARCH  
508 study, 21 samples initially returned a positive result based on the RT-qPCR performed by the  
509 collaborating SEARCH research labs. Samples from all positive tests based on the research  
510 testing pipeline were sent to a CLIA-certified lab for validation using their clinical testing pipeline  
511 before results were returned to participants. Of the 21 initial positive tests, 18 were validated as  
512 true positives, and three were returned as false positives. Therefore, the false-positive rate for

513 the SEARCH study was 0.037%. Because the EXCITE lab is itself a CLIA-certified lab, positive  
 514 results were reported directly without external validation. Of the 752 true positive results  
 515 identified through both SEARCH and EXCITE, 715 tests were obtained from unique individuals,  
 516 with 35 individuals testing positive on two different occasions and one individual testing positive  
 517 on three different occasions. The average time between positive tests for the same individual  
 518 was 5 days; no individuals from this study were identified to be re-infected after recovering from  
 519 COVID-19.

520 While the SEARCH study only collected NP swabs in VTM, the EXCITE lab used AN  
 521 swabs in three different preservation media; MTM, Mawi, and 5% SDS, corresponding to ANM,  
 522 ANW, and AND sample types, respectively. All three media inactivate the SARS-CoV-2 virus,  
 523 enabling self-collection. The ANM sample type was validated first, but was soon replaced by  
 524 ANW and AND, which are non-toxic, allowing for unobserved self-collection. AND samples  
 525 produced invalid results significantly more often than samples collected in other preservation  
 526 media (Table 2); AND samples comprised only 4.7% of all samples, but 67.8% of all invalid test  
 527 results. As a consequence, the EXCITE lab quickly discontinued the use of AND samples,  
 528 focusing instead on ANW samples.

529 **Table 2.** SARS-CoV-2 RT-qPCR test results obtained from SEARCH and EXCITE, by sample  
 530 type: AND (anterior nares swab in 5% SDS); ANM (anterior nares swab in MTM); ANW (anterior  
 531 nares swab in Mawi); NPV (nasopharyngeal swab in VTM). All NPV samples were obtained  
 532 from SEARCH, and all AND, ANM, and ANW samples were obtained from EXCITE. Samples  
 533 where no viral target genes amplified but the internal control did amplify were considered  
 534 negative. Samples where at least two out of three viral target genes amplified were considered  
 535 positive. Samples where neither the viral target genes nor the internal control amplified were  
 536 considered invalid. Samples where only one out of three viral target genes amplified were  
 537 considered inconclusive.

|              | AND          | ANM           | ANW            | NPV          | Total          |
|--------------|--------------|---------------|----------------|--------------|----------------|
|              | n (%)        | n (%)         | n (%)          | n (%)        | n (%)          |
| Negative     | 7288 (96.56) | 20959 (99.90) | 124182 (99.35) | 8032 (99.58) | 160461 (99.31) |
| Positive     | 38 (0.50)    | 15 (0.07)     | 681 (0.54)     | 18 (0.22)    | 752 (0.47)     |
| Invalid      | 221 (2.93)   | 3 (0.01)      | 90 (0.07)      | 12 (0.15)    | 326 (0.20)     |
| Inconclusive | 1 (0.01)     | 2 (0.01)      | 36 (0.03)      | 4 (0.05)     | 43 (0.03)      |

|              |                   |                    |                     |                   |                     |
|--------------|-------------------|--------------------|---------------------|-------------------|---------------------|
| <i>Total</i> | <i>7548 (100)</i> | <i>20979 (100)</i> | <i>124989 (100)</i> | <i>8066 (100)</i> | <i>161582 (100)</i> |
|--------------|-------------------|--------------------|---------------------|-------------------|---------------------|

538  
539           The percentage of positive tests from the SEARCH study was very low: only 17  
540 participants (0.27%) had a positive COVID-19 test throughout the 2.5 month duration of the  
541 study (one of these participants submitted two positive samples, resulting in the count of 18  
542 positive NPV test results in Table 2), and positive cases were spread relatively evenly  
543 throughout the timeframe of the study, with the rolling average always below 1% positivity (Fig  
544 1A). Comparatively, SD County testing reported much higher positivity, with rolling average  
545 positivity ranging from ~2-7% over the same time period (Fig 1C). In the EXCITE lab, positivity  
546 changed over time, starting low from mid-September through mid-November, and then rising  
547 following the Thanksgiving holiday (Nov 26, 2020), and rising again to a peak in early January  
548 2021, after the winter holidays (Fig 1B). The number of tests performed per day increased  
549 throughout the fall, as the program was ramped up to test students residing in campus-owned  
550 housing or coming to campus every two weeks, and then decreased in late December 2020  
551 when many students left the UCSD campus for the holidays. Overall testing was highest in early  
552 January 2021, when students residing in campus-owned housing or coming to campus were  
553 required to participate in intensive testing upon their return to campus (at days 1, 5, and 10 after  
554 return), and then went to a weekly testing cadence thereafter (see “Return to Learn at UCSD”  
555 section below for more details). The EXCITE data show a similar trend in positive test rates to  
556 the data from data from SD County (Fig 1C), except that the increase in positive cases in the fall  
557 started later (at the end of November 2020 for EXCITE, compared to the beginning of  
558 November for SD County) and show a slightly earlier drop in positive cases in January 2021 at  
559 EXCITE. The positivity rate of the SD County data was much higher than the rates reported by  
560 both SEARCH and EXCITE over the same time frame; the rolling average positivity rate for  
561 SEARCH never rose above 1%, and for EXCITE was less than 2% at its peak, as compared to  
562 the SD County data, where test positivity ranged from 2-15% across the same time period (April

563 17, 2020 - February 5, 2021). We note that the populations being tested by SD County are  
564 different from those tested in our study. Our data collection involved repeated screening of  
565 asymptomatic populations, while samples collected by SD County are more often from  
566 individuals who exhibit symptoms or have been exposed to a known COVID-19 case, likely  
567 explaining the large discrepancy in positivity rates. In particular, students at UCSD who were  
568 experiencing symptoms were referred to the Center for Advanced Laboratory Medicine (CALM),  
569 a separate CLIA-certified laboratory on campus, to be tested. Similarly, students and staff at the  
570 preschool-grade 12 partner schools were asked to stay home and obtain testing at SD County  
571 testing sites if they experienced any symptoms.

572         The winter holidays are typically a very social time for people living in the US, and  
573 despite the COVID-19 pandemic, millions of Americans traveled during the holidays in late  
574 2020, contributing to a sharp increase in cases reflected both in our data and in the SD County  
575 data. The decline in UCSD cases throughout January 2021 was due to early detection of cases  
576 after return from winter break, minimal transmission on campus, and reduced community  
577 transmission in SD County. The decline in SD County cases observed in January 2021 is likely  
578 due to people returning to their homes following the winter holiday and the subsequent  
579 decrease in travel and social gatherings, and to a lesser extent, an increase in vaccination  
580 rates, which began in late 2020. Countries with higher vaccination rates in early 2021, including  
581 the UK and Israel, saw sharp declines in new COVID-19 cases and hospital admissions in  
582 February 2021, highlighting the remarkable efficacy of these vaccines, even after one dose  
583 (28,29).

584



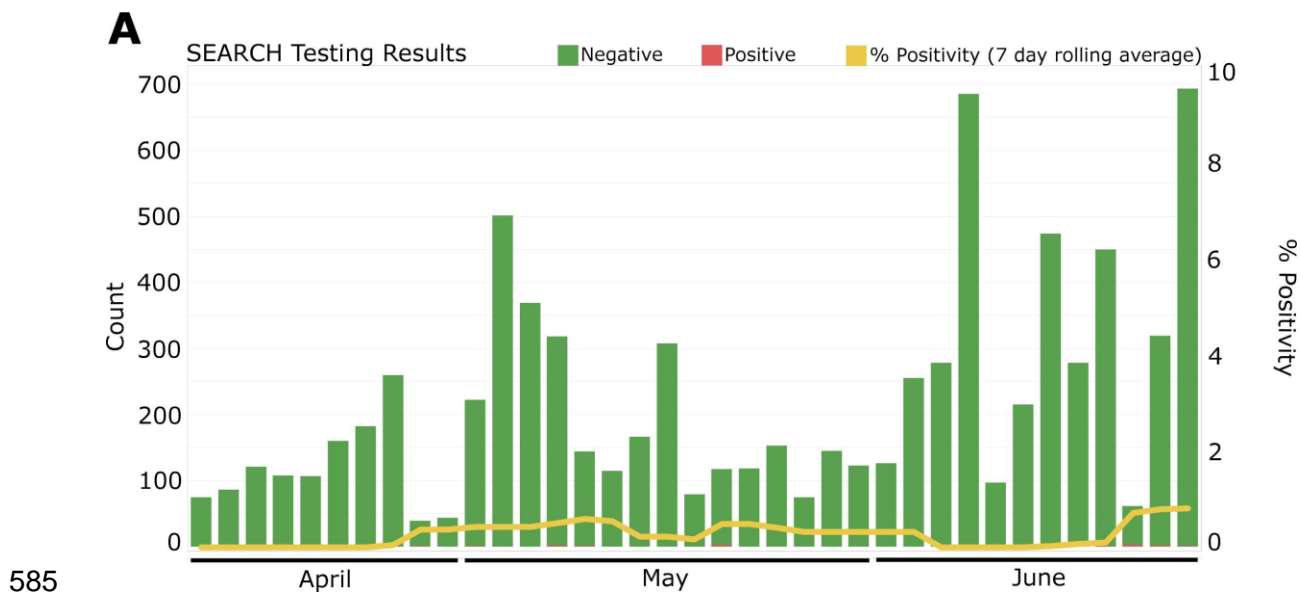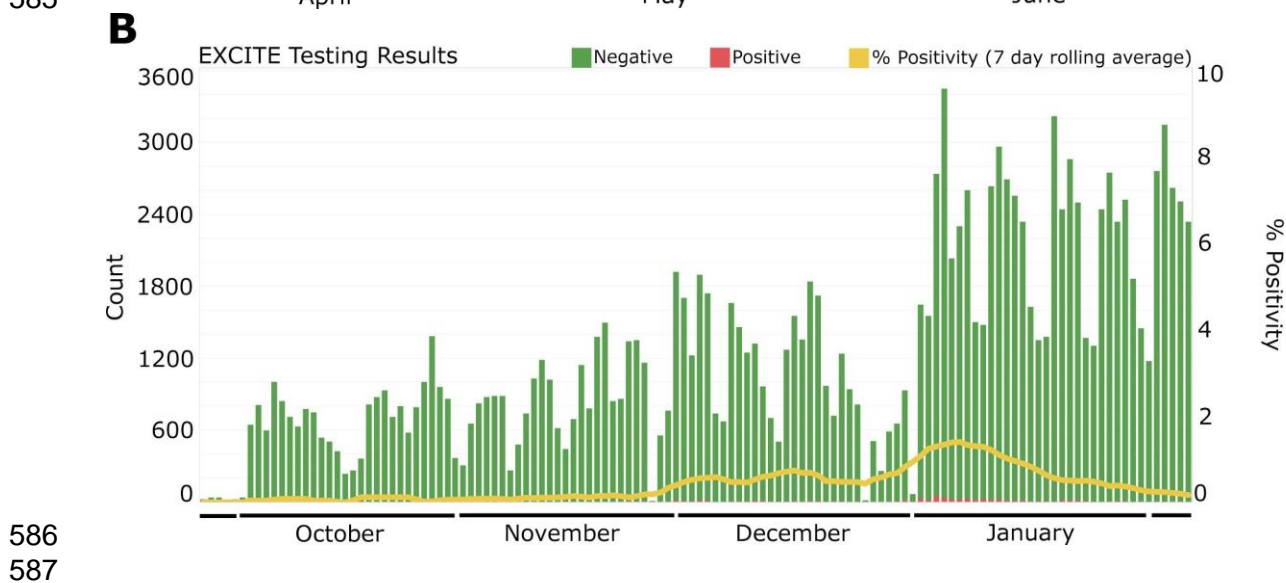

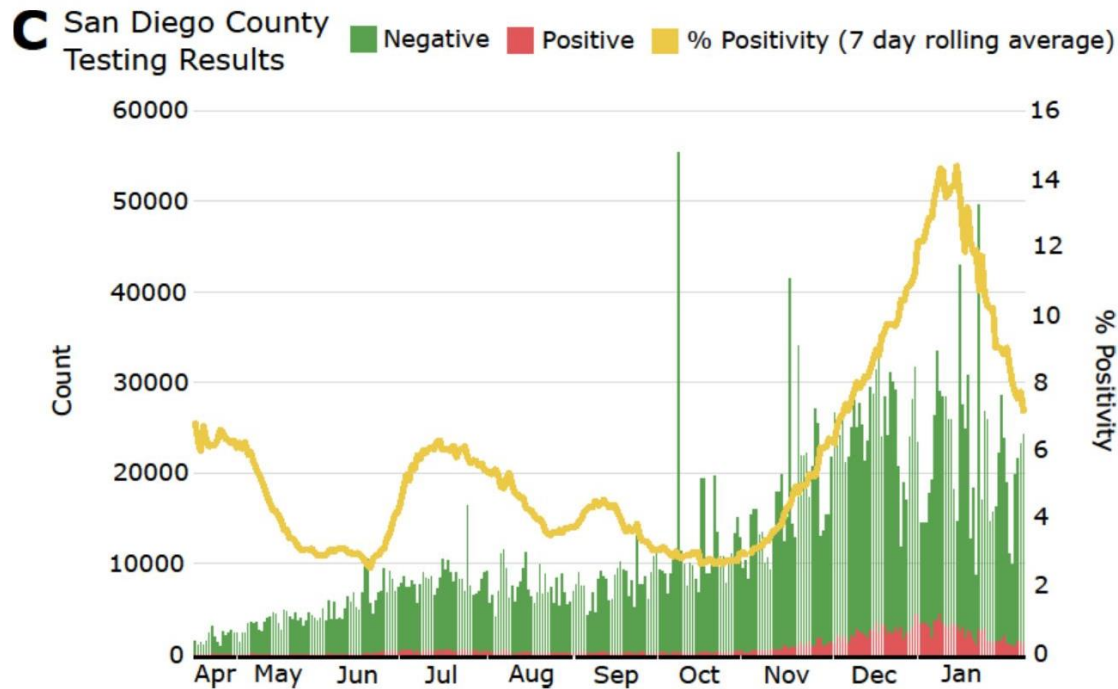

588  
589 **Fig 1.** COVID-19 test results and rolling average of positivity rate for (A) SEARCH study  
590 participants (Apr 17 - Jun 30, 2020), (B) EXCITE lab participants (Sep 15, 2020 - Feb 5, 2021),  
591 and (C) San Diego County testing results (Apr 17, 2020 - Feb 5, 2021).  
592

593 Almost all of the positive tests for this study came from the EXCITE lab dataset, and  
594 most positive tests were obtained between mid-November, 2020, and mid-January, 2021.  
595 UCSD participants made up most of the positive tests, which was expected because most of the  
596 EXCITE testing was conducted on UCSD students and staff (Fig 2). Only SDFD and UCSD  
597 participants were tested by both SEARCH and EXCITE (Fig 2). However, the UCSD population  
598 tested during the SEARCH study was different than that tested by the EXCITE lab. During the  
599 SEARCH study, some UCSD employees involved in the study chose to participate in testing.  
600 While these employees likely also participated in testing through the EXCITE lab, they were not  
601 the main targets of either testing effort; the SEARCH study was designed to screen healthcare  
602 workers and first responders, and the EXCITE lab was established to screen students, faculty,  
603 and staff at UCSD and some partner institutions, with a focus on testing schools.  
604

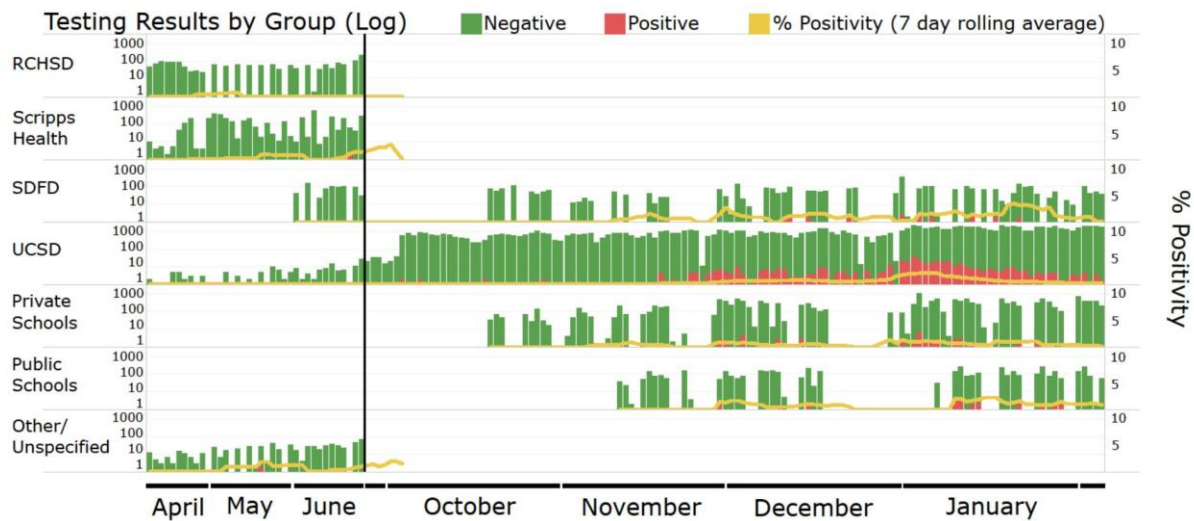

605  
606 **Fig 2.** Log-transformed graph of COVID-19 testing results over time (by day), separated by  
607 source group. Participants being tested belonged to one of seven groups: RCHSD (Rady  
608 Children’s Hospital San Diego); Scripps Health (Scripps HealthCare); SDFD (San Diego Fire-  
609 Rescue Department); UCSD (University of California, San Diego); Private Schools (preschool-  
610 grade 12); Public Schools (preschool-grade 12); Other/Unspecified (healthcare workers from  
611 other locations).

612  
613 COVID-19 case data from SD County show that the 20-39 age group represents the  
614 highest number of cases (and case rates), followed by the 40-59 age group (Fig 3). The age  
615 groups represented by children (0-9 and 10-19) reported the lowest number of cases in the  
616 County. Within the EXCITE data from this study, participants in the 20-39 age group also made  
617 up the majority of cases, with all other age groups falling well below (Fig 3). This is largely due  
618 to the demographics of the EXCITE testing population, where the majority of participants were  
619 university students. We note that the 10-19 age range represents a higher proportion of cases in  
620 the EXCITE data than in the County data, also likely because of the large number of university  
621 students in the 18-19 age range in our study.

622

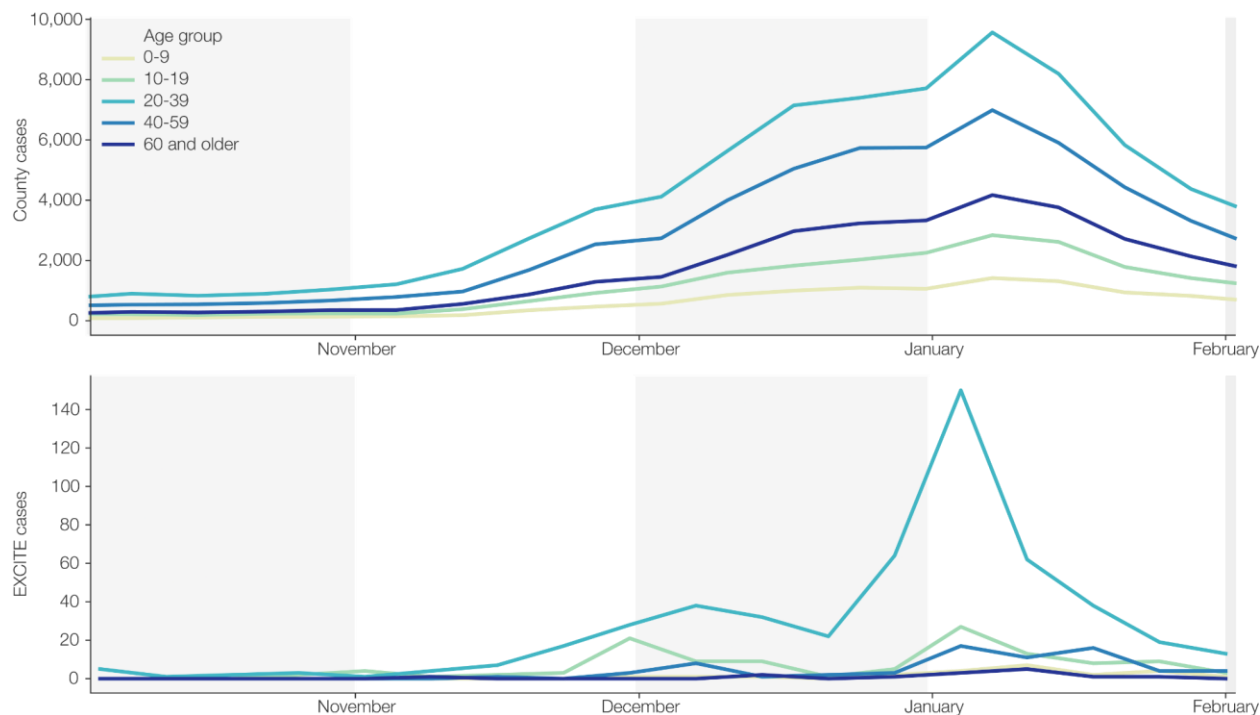

623  
624 **Fig 3.** Number of positive cases per week, separated by age group. Top: San Diego County  
625 COVID-19 cases over time (Sep 15, 2020 to Feb 5, 2021). Bottom: EXCITE lab COVID-19  
626 cases over the same timeframe.

627  
628 No significant differences in viral load (estimated by Ct value) were observed for  
629 participants from different age groups (Fig S4). Previous studies have varied in their reports of  
630 viral loads in patients of different age groups. Some, like this current study, have not found any  
631 significant correlation between viral load and age groups (30–33), while others have (34–37). In  
632 the studies that did observe a difference, the results are conflicting: Euser et al. (37) reported  
633 that children <12 years had lower viral loads than adults, while Heald-Sargent et al. (36)  
634 reported children <5 years had higher viral loads than older children and adults. Additionally,  
635 Hasanoglu et al. (35) reported decreasing viral load with increasing age in adults, while To et al.  
636 (34) reported the opposite trend. Consistent with previous reports (10,31), we did not find any  
637 significant difference in viral load between male and female participants ( $t = 0.02$ ,  $df = 645.7$ ,  $p$   
638  $= 0.98$ ).

639 Only two of the three SARS-CoV-2 target genes were required to amplify for a test to be  
640 considered positive. The S-gene was the most common 'dropout' (i.e. the gene that failed to

641 amplify), occurring in approximately 10% of positive cases; N-gene and ORF1ab dropouts  
642 occurred in approximately 1-2% of positive cases, respectively. With the exception of the cases  
643 in this study infected with the B.1.1.7 SARS-CoV-2 variant of concern, which show a  
644 characteristic S-gene dropout with low Ct values (<30) for the other two viral genes (38),  
645 samples with viral gene dropouts had higher average Ct values (i.e. lower viral load) as  
646 compared to samples without dropouts (Fig S5); samples containing gene dropouts had an  
647 average Ct value of  $32.3 \pm 1.1$ , while samples without dropouts averaged  $23.0 \pm 5.3$  ( $t = -29.7$ ,  
648  $df = 2.2$ ,  $p = 0.001$ ). Seven cases were identified that were consistent with the B.1.1.7 variant  
649 (9.2% of all cases with S-gene dropouts), and the average Ct value for these seven cases was  
650  $21.9 \pm 5.5$ .

## 651 **Symptom Reporting**

652 Symptom reporting differed between SEARCH and EXCITE (Fig 4). In total, SEARCH  
653 participants filled out 7,489 symptom questionnaires (Table 3), and EXCITE participants filled  
654 out 18,318 (Table 4). Therefore, 92.8% of SEARCH samples were accompanied by symptom  
655 reporting, compared with just 11.9% of EXCITE samples. This discrepancy is due to the  
656 different nature of each screening system. The SEARCH study was designed as a prospective  
657 research study, so occupation and symptom information was requested from all participants.  
658 The EXCITE lab was designed for high-throughput screening of asymptomatic populations, with  
659 no UCSD participants being asked to report symptoms at the time of testing, and participants  
660 from other partners being asked an abbreviated set of questions. Additionally, EXCITE  
661 participants were generally assumed to be asymptomatic, because any symptomatic individuals  
662 were encouraged to stay home and seek other means of testing. Conversely, at the time when  
663 SEARCH was implemented (April 2020), it was the only means of obtaining a COVID-19 test for  
664 many participants, resulting in a number of participants seeking out testing through SEARCH  
665 specifically because they were exhibiting symptoms they felt might be related to COVID-19. The

666 timing of the SEARCH study also overlapped with the end of flu season, potentially explaining  
667 the higher number of participants reporting symptoms at the beginning of the study as  
668 compared to later in the study (Fig 4A). Indeed, when SEARCH participants waiting in line to be  
669 tested were asked why they chose to participate, their reasons mostly fell within four common  
670 themes: (1) early in the study, many believed their symptoms could represent COVID-19 illness  
671 but were unable to qualify for clinical testing because they were “not sick enough” per the  
672 testing triage protocols in place at the time; (2) later in the study, others believed their symptoms  
673 more likely represented seasonal allergies than COVID-19 but wanted to confirm, and  
674 understood the importance of reporting these symptoms nonetheless; (3) some reported intense  
675 stress regarding the pandemic and believed their symptoms of headache, fatigue, or muscle  
676 aches might be due to worry or poor sleep, but again wanted to confirm; (4) finally, several said  
677 they sought the privacy of testing outside their own healthcare workplaces. These unanticipated  
678 explanations for study participation illuminate some unmet needs for frontline workers in  
679 healthcare environments during the uncertainties of an unprecedented pandemic.

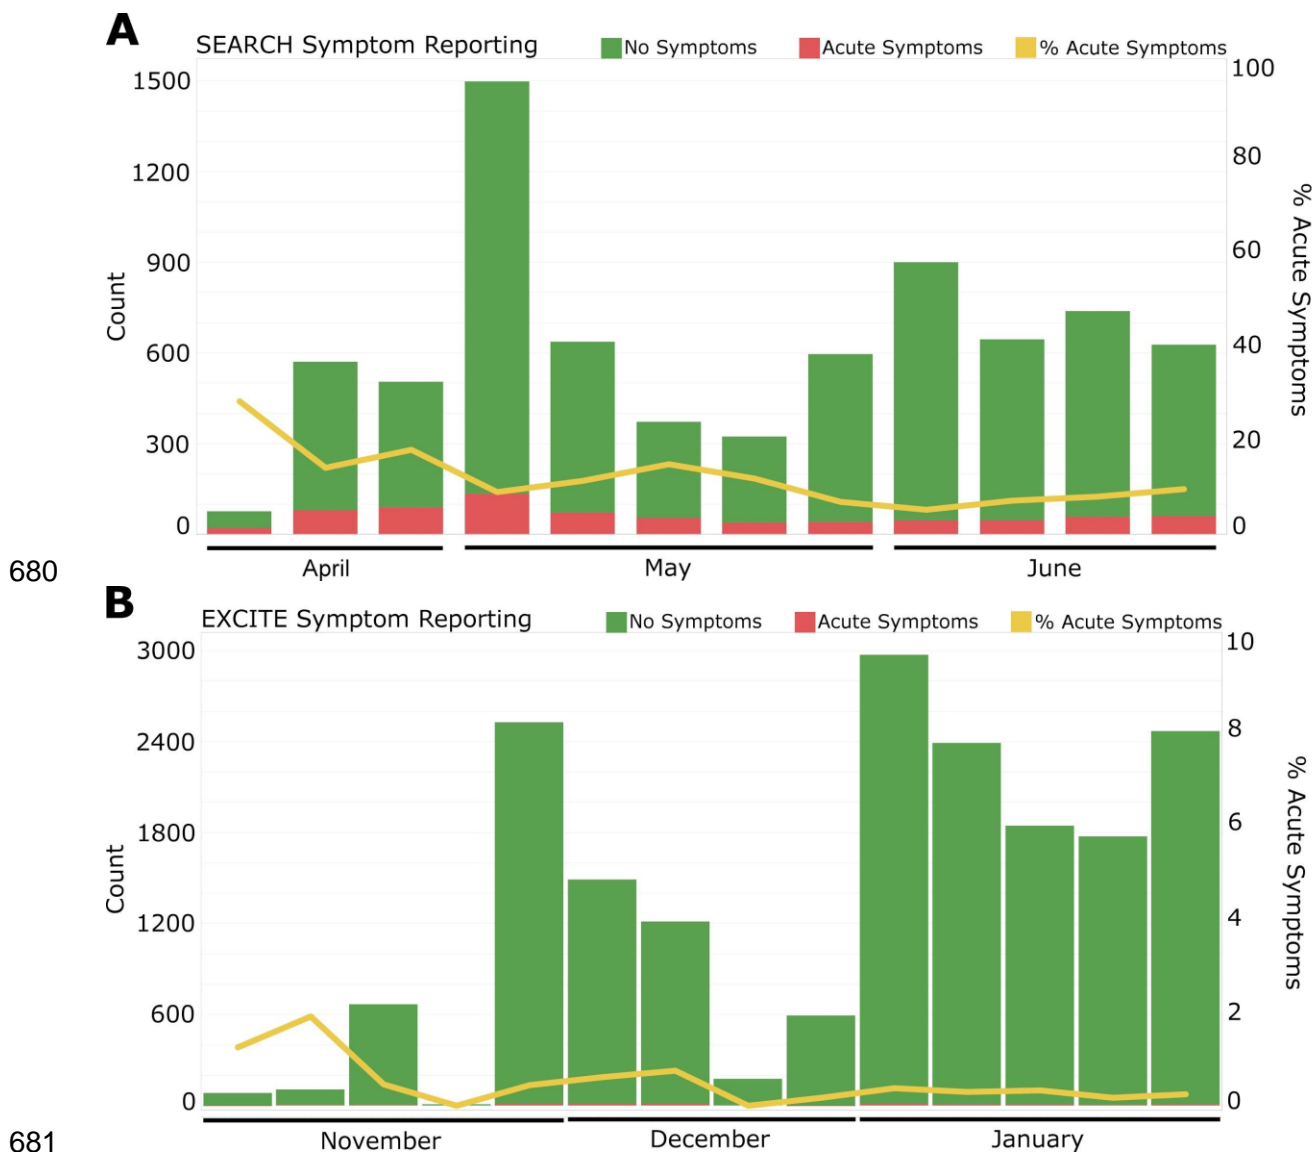

680

681

682 **Fig 4.** Symptom reporting by (A) SEARCH participants and (B) EXCITE participants over time.

683

684 **Table 3.** Symptom reporting by SEARCH participants who completed a symptom questionnaire  
 685 at the time of testing. Results are per test, not per participant, in the case of participants testing  
 686 on multiple occasions. Invalid and Inconclusive tests are included in the “All Tests” column but  
 687 are not represented in subsequent columns.

| Symptoms     | All Tests<br>n (%) | Negative Tests<br>n (%) | Positive Tests<br>n (%) |
|--------------|--------------------|-------------------------|-------------------------|
| No symptoms  | 6746 (90.08)       | 6723 (90.17)            | 10 (55.56)              |
| Any symptoms | 743 (9.92)         | 733 (9.83)              | 8 (44.44)               |
| Fever        | 18 (0.24)          | 15 (0.20)               | 3 (16.67)               |
| Chills       | 47 (0.63)          | 43 (0.58)               | 4 (22.22)               |
| Cough        | 152 (2.03)         | 147 (1.97)              | 4 (22.22)               |
| Sore throat  | 177 (2.36)         | 173 (2.32)              | 4 (22.22)               |



|                   |                   |                   |                 |
|-------------------|-------------------|-------------------|-----------------|
| Trouble breathing | 45 (0.60)         | 44 (0.59)         | 1 (5.56)        |
| Stuffy nose       | 205 (2.74)        | 200 (2.68)        | 5 (27.78)       |
| Runny nose        | 190 (2.54)        | 185 (2.48)        | 5 (27.78)       |
| Nausea            | 77 (1.03)         | 74 (0.99)         | 3 (16.67)       |
| Vomiting          | 13 (0.17)         | 13 (0.17)         | 0 (0)           |
| Diarrhea          | 61 (0.81)         | 58 (0.78)         | 3 (16.67)       |
| Fatigue           | 169 (2.26)        | 165 (2.21)        | 4 (22.22)       |
| Myalgia           | 149 (1.99)        | 143 (1.92)        | 5 (27.78)       |
| Rash              | 24 (0.32)         | 24 (0.32)         | 0 (0)           |
| <i>Total</i>      | <i>7489 (100)</i> | <i>7456 (100)</i> | <i>18 (100)</i> |

688  
689 **Table 4.** Symptom reporting by EXCITE participants who completed a symptom questionnaire  
690 at the time of testing. Results are per test, not per participant, in the case of participants testing  
691 on multiple occasions.

| <b>Symptoms</b>   | <b>All Tests</b>   | <b>Negative Tests</b> | <b>Positive Tests</b> |
|-------------------|--------------------|-----------------------|-----------------------|
|                   | <b>n (%)</b>       | <b>n (%)</b>          | <b>n (%)</b>          |
| No symptoms       | 18249 (99.62)      | 18093 (99.68)         | 90 (89.11)            |
| Any symptoms      | 69 (0.38)          | 58 (0.32)             | 11 (10.89)            |
| Fever             | 7 (0.04)           | 2 (0.01)              | 5 (4.95)              |
| Cough             | 11 (0.06)          | 8 (0.04)              | 3 (2.97)              |
| Trouble breathing | 2 (0.01)           | 2 (0.01)              | 0 (0)                 |
| Fatigue           | 10 (0.05)          | 6 (0.03)              | 4 (3.96)              |
| Headache          | 25 (0.14)          | 20 (0.11)             | 5 (4.95)              |
| Anosmia           | 4 (0.02)           | 2 (0.01)              | 2 (1.98)              |
| Sore throat       | 9 (0.05)           | 8 (0.04)              | 1 (0.99)              |
| Stuffy/runny nose | 28 (0.15)          | 23 (0.13)             | 5 (4.95)              |
| Nausea            | 8 (0.04)           | 8 (0.04)              | 0 (0)                 |
| Diarrhea          | 6 (0.03)           | 6 (0.03)              | 0 (0)                 |
| <i>Total</i>      | <i>18318 (100)</i> | <i>18151 (100)</i>    | <i>101 (100)</i>      |

692  
693 Among all SEARCH participants, the most common symptoms reported at the time of  
694 testing were stuffy nose, runny nose, sore throat, fatigue, and cough (Table 3). The least  
695 common symptoms reported were vomiting, trouble breathing, and fever. Among the  
696 participants who tested positive and also completed a symptom questionnaire, the most  
697 common symptoms at the time of testing were stuffy nose, runny nose, and myalgia (muscle  
698 pain), and the least common symptoms were rash, vomiting, and trouble breathing (Table 3).  
699 More than 90% of participants who tested negative reported no symptoms, compared with  
700 ~55% of participants who tested positive; nearly 45% of participants who tested positive

701 reported at least one symptom at the time of their test, with five being the average number of  
702 symptoms reported per person, out of a possible 14. The average age of SEARCH participants  
703 who completed symptom questionnaires was  $42.9 \pm 12.2$ . Of the 18 positive tests, 17 belonged  
704 to different individuals. One participant tested positive twice, reporting symptoms at the time of  
705 their first positive test, and reporting no symptoms at the time of their second positive test, nine  
706 days later. This participant tested negative on their third test, 16 days after their first positive  
707 test.

708         Among the EXCITE participants who completed symptom questionnaires, the most  
709 common symptoms reported at the time of testing were headache and stuffy/runny nose (Table  
710 4). The least common symptoms reported were trouble breathing and anosmia (loss of sense of  
711 smell). Among the participants who tested positive and also completed a symptom  
712 questionnaire, the most common symptoms at the time of testing were fever, headache, and  
713 stuffy/runny nose, and the least common symptoms were trouble breathing, nausea, and  
714 diarrhea (Table 4). More than 99% of participants who tested negative reported no symptoms,  
715 compared with 89% of participants who tested positive; nearly 11% of participants who tested  
716 positive reported at least one symptom at the time of their test, with two being the average  
717 number of symptoms reported per person, out of a possible 10. The average age of EXCITE  
718 participants who completed symptom questionnaires was  $24.1 \pm 16.4$ .

719         Different symptom questions were asked of SEARCH and EXCITE participants. Some  
720 symptoms characteristic of COVID-19, such as anosmia (loss of sense of smell), were not  
721 included in the SEARCH study because sample collection began before this symptom was  
722 recognized as an indicator of COVID-19. Other symptoms, such as myalgia (muscle soreness)  
723 and rash, were included in the SEARCH questionnaire but not the EXCITE questionnaire. This  
724 is because only the most common cold, flu, and COVID-19 symptoms were included in the  
725 EXCITE questionnaire.

726           Of the 17 SEARCH patients who tested positive for SARS-CoV-2, 11 were available for  
727 regular telephone follow-ups, undertaken for 2-3 weeks in order to gain an understanding of  
728 symptom progression. Only three of these 11 people reported symptoms at the time of testing:  
729 one reported fever, one reported fatigue, muscle aches, and chills, and one reported cough,  
730 nasal congestion, and sore throat. Among the eight who did not report symptoms at the time of  
731 testing, five developed symptoms within 24 h of participating in the study, ranging from ageusia  
732 (loss of sense of taste) ( $n = 2$ ) to sore throat with rhinorrhea (runny nose) ( $n = 1$ ) to fever and  
733 cough ( $n = 2$ ). One patient developed anosmia within 72 h, followed by severe fatigue and later  
734 a cough. Finally, two patients reported no symptoms of illness by two and three weeks,  
735 respectively. None of the ill participants required hospitalization, though one had an extended  
736 productive cough that began two days after testing positive and was placed on work leave for  
737 three weeks. While more than half of the SEARCH participants who tested positive for SARS-  
738 CoV-2 in our study did not report any symptoms at the time of testing, most went on to develop  
739 symptoms within 2-3 days of their first positive test, suggesting that within our study, being pre-  
740 symptomatic at the time of testing was more common than having an asymptomatic infection.  
741 Interestingly, shortness of breath/trouble breathing, which is considered a hallmark symptom of  
742 COVID-19, was reported by only one positive participant at the time of testing across both  
743 SEARCH and EXCITE, suggesting that this symptom may typically develop later on in the  
744 progression of the disease, as noted by some previous studies (39,40), and may not be a good  
745 screening question to determine whether a person qualifies for a COVID-19 test. Reporting of  
746 the prevalence of shortness of breath/trouble breathing as a major symptom is inconsistent: one  
747 study also found shortness of breath to be a less common symptom (41), but other studies have  
748 reported shortness of breath to be one of the most common symptoms (42–44). However, it  
749 should be noted that these studies involved assessing symptoms in hospitalized patients, or  
750 even patients who suffered fatal cases of COVID-19, which represents a small fraction of  
751 infections.

752 Viral load was significantly correlated with the presence of symptoms for all three target  
753 genes (Fig 5), and only one of the 19 positive tests that were accompanied by a positive  
754 reporting of symptoms contained a gene dropout, suggesting that presentation of symptoms  
755 may indicate higher viral load in the body. Some previous studies have identified a correlation  
756 between viral load and symptom severity (45,46), but most of these studies were conducted on  
757 hospitalized patients. Conversely, other studies have found viral loads to be unchanged (13) or  
758 even higher (35) in asymptomatic patients as compared to symptomatic patients. Interestingly,  
759 overall Ct values from SEARCH positives were higher than those from EXCITE positives,  
760 regardless of symptom reporting ( $t = -2.7$ ,  $df = 18.1$ ,  $p = 0.01$ ) (Fig 5). It is possible that  
761 differences in the tested populations, sample type (nasopharyngeal versus anterior nares  
762 swabs), collection media, or RNA extraction kits used in SEARCH compared to EXCITE  
763 contributed to this observation.

764  
765

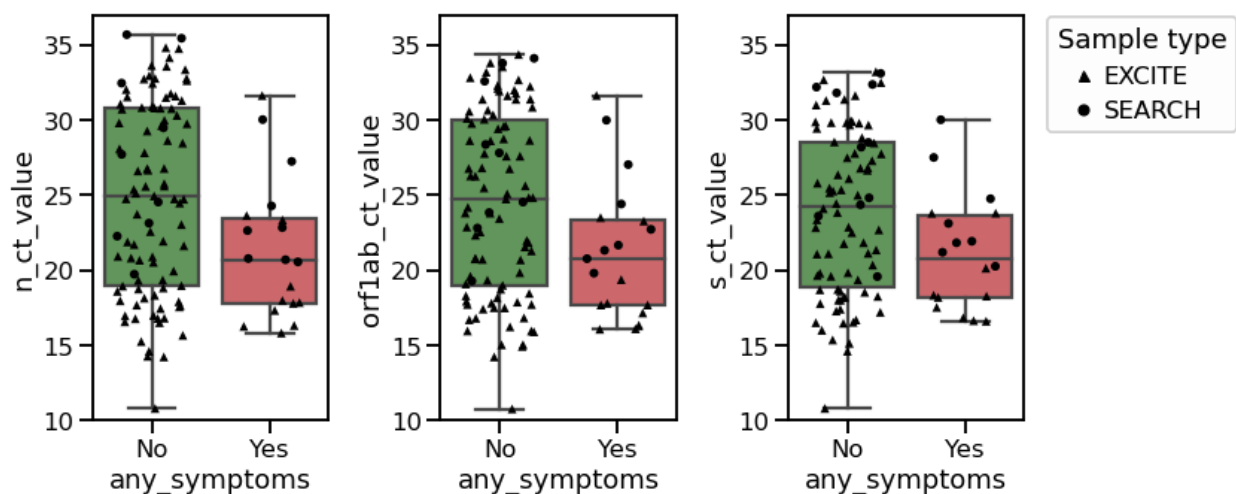

766  
767 **Fig 5.** Ct values of three SARS-CoV-2 gene targets as a function of symptom reporting ( $n =$   
768 119). Samples from positive participants who also reported having symptoms had significantly  
769 lower Ct values (i.e. higher viral load) for all three gene targets, as compared with samples from  
770 positive participants who reported no symptoms (independent  $t$ -test  $p$ -value for N-gene,  
771 ORF1ab, and S-gene = 0.023, 0.031, 0.044, respectively).

772

773

## 774 **Healthcare Workers and First Responders**

775 In order to keep the healthcare worker and first responder data together, we have  
776 included the SDFD first responders who were tested through the EXCITE lab in this section.  
777 Therefore, this section contains data from 6,786 individuals, while the SEARCH study itself only  
778 included 6,376 individuals. Of 11,964 total swabs, 3,935 were collected at RCHSD, 4,138 were  
779 collected at Scripps Health locations, and 3,891 were collected by the EXCITE lab. A proportion  
780 of study participants (1,167) chose to be tested on multiple occasions, some as many as 22  
781 times, although the majority of high-repeat participants were those from SDFD who were tested  
782 routinely through the EXCITE lab (Fig S6a). Of the 12,143 eligible Scripps employees who  
783 received an invitation to participate in this study, 3,838 (31.6%) participated at least once. Of the  
784 1,470 eligible SDFD employees, 1,162 (79.0%) participated in testing at least once: 120 (8.2%)  
785 participated only in SEARCH, 410 (27.9%) participated only in EXCITE, and 632 (43.0%)  
786 participated in both. Approximately 8,000 Rady employees received an email inviting them to  
787 participate, but only approximately 6,000 opened the email. Additionally, this email was sent to  
788 employees of Rady Children’s Hospital San Diego (RCHSD), Rady Children’s Institute for  
789 Genomic Medicine (RCIGM), and Rady Children’s Specialists of San Diego (RCSSD), but on  
790 the intake form, only RCHSD was one of the pre-specified options, meaning employees of  
791 RCIGM and RCSSD likely would have selected the “Other” option as their employer, or simply  
792 not specified. A conservative estimate of participation, therefore, suggests that out of  
793 approximately 8,000 eligible Rady employees, 1,220 RCHSD employees (15.3%) participated.  
794 A more liberal estimate of participation would include both RCHSD and “Other” employees, and  
795 only those employees who opened their invitation email, resulting in 1,562 employees being  
796 tested out of an estimated possible 6,000 (26.0%). However, a small number of employees from  
797 Sharp HealthCare were informed of this study by word-of-mouth and were allowed to  
798 participate; these employees would likely have chosen “Other” or “Unspecified” as their

799 organization as well. The true proportion of the target population tested is therefore likely  
800 somewhere between 15.3-26.0% for Rady employees. For simplicity, tables and Figs in this  
801 section combine the employees who selected “RCHSD” and “Other/Unspecified” into a single  
802 category, “Rady”. A small number of UCSD Health employees (112) also opted to be tested one  
803 or more times. These participants selected “UCSD” as their employer, but because UCSD  
804 employees were not targeted by the SEARCH study, we cannot estimate the proportion of  
805 employees tested for this population.

806 Participants were asked to add a job description on their intake forms. Because these  
807 job descriptions were free-text and not pre-specified categories, a wide range of occupations  
808 were reported. These occupations were manually combined into 14 major categories with the  
809 remainder being assigned to “Other/Unspecified” (Table 5). Approximately one-third (34.0%) of  
810 healthcare worker participants from Scripps and Rady were employed as nurses, with the next  
811 most common job category being general healthcare worker (24.2%), followed by doctor  
812 (11.9%). The proportions of nurses and doctors in this study is similar to their actual proportions  
813 at the hospitals and clinics from this study. The most common occupation among COVID-19  
814 positive participants was first responder (66.7%) - this is because SDFD members additionally  
815 participated in repeated screening through the EXCITE lab in late 2020 and early 2021, and the  
816 entirety of the positive first responder cases came from that later time period, when cases in SD  
817 County were markedly higher. During the SEARCH study timeframe (April - June 2020), no  
818 SDFD members tested positive through our pipeline, and the most common occupations testing  
819 positive at that time were general healthcare workers and nurses (5 participants each). While  
820 some of these participants were presumed to have contracted the virus from work, others were  
821 able to trace their infection to other sources, such as a family gathering or a spouse with a  
822 public-facing job.

823

824 **Table 5.** Occupations of healthcare workers and first responders.

| <b>Occupation</b>           | <b>All Participants</b> | <b>Positive Participants</b> |
|-----------------------------|-------------------------|------------------------------|
|                             | <b>n (%)</b>            | <b>n (%)</b>                 |
| Administrative              | 302 (4.45)              | 1 (1.96)                     |
| Dental worker               | 23 (0.34)               |                              |
| Dentist                     | 30 (0.44)               |                              |
| Dietitian                   | 34 (0.50)               |                              |
| Doctor                      | 689 (10.15)             | 1 (1.96)                     |
| First Responder             | 1242 (18.30)            | 34 (66.67)                   |
| Food Service                | 37 (0.55)               | 1 (1.96)                     |
| Healthcare worker (general) | 1340 (19.75)            | 5 (9.80)                     |
| IT                          | 43 (0.63)               |                              |
| Management                  | 332 (4.89)              | 2 (3.92)                     |
| Nurse                       | 1884 (27.76)            | 5 (9.80)                     |
| Pharmacist                  | 76 (1.12)               |                              |
| Pharmacy worker             | 29 (0.43)               |                              |
| Student                     | 35 (0.52)               | 1 (1.96)                     |
| Other/Unspecified           | 690 (10.17)             | 1 (1.96)                     |
| <i>Total</i>                | <i>6786 (100)</i>       | <i>51 (100)</i>              |

825 Demographic questions were asked of the participants; these questions were not  
826 mandatory for participation, but the majority of participants responded to most or all of the  
827 questions. The median age of healthcare workers was 41 for all target populations (Scripps  
828 Health, Rady, and SDFD) (Fig 6, Table 6). The median age of those participants who tested  
829 positive was significantly lower overall (35 years) and for healthcare workers (32 and 28 years  
830 for Scripps Health and Rady participants, respectively), but not significantly lower for SDFD  
831 participants (38.5 years) (Table 6). The overall data are consistent with CDC observations that  
832 the median age of COVID-19 infections has declined over time, from >40 years to <36 years  
833 between the months of March and July 2020 (47), and are in line with the median age (36  
834 years) of confirmed COVID-19 cases among SD County residents at large  
835 ([https://www.sandiegocounty.gov/content/dam/sdc/hhsa/programs/phs/Epidemiology/COVID-  
836 19%20Watch.pdf](https://www.sandiegocounty.gov/content/dam/sdc/hhsa/programs/phs/Epidemiology/COVID-19%20Watch.pdf)). Greene et al. (47) suggest that this decrease in the median age of confirmed  
837 COVID-19 cases is a result of changing testing patterns, not changes in the epidemiology of  
838 SARS-CoV-2 infection.



839 Female participants made up 74.0% of healthcare workers, which is representative of  
840 the makeup of the workforce at the hospitals and clinics involved in this study, which are  
841 approximately 74% female across Scripps Health and approximately 83% female at RCHSD.  
842 Conversely, male participants made up 84.9% of first responders from SDFD, which is slightly  
843 lower than the national proportion of male firefighters (96%) (<https://nfpa.org>). Of the  
844 participants who tested positive for SARS-CoV-2, 70.6% of healthcare employees were female,  
845 while 85.7% of SDFD employees were male. Overall, males were significantly more likely to test  
846 positive than females (Table 6); however, when separated by source (Scripps Health, Rady,  
847 SDFD), no differences were observed. This is because the majority of the positive tests came  
848 from SDFD workers, who were predominantly male. Previous studies have suggested that  
849 males may be more susceptible to this virus (48), but our results are proportional to the  
850 populations tested in this study.

851 The majority of participants (72.1%) did not report their ethnicity, and almost one third  
852 (28.4%) did not report their race (Table 6). For the SEARCH study, race and ethnicity were  
853 presented as a single “check all that apply” question, which resulted in many people choosing  
854 only a race, only an ethnicity, or neither. Most participants did not select an ethnicity, and those  
855 that did select an ethnicity overwhelmingly selected Hispanic and did not also select a race. For  
856 the SDFD participants who were tested through the EXCITE lab, race and ethnicity were  
857 included as separate questions, which we believe improved reporting compliance. The EXCITE  
858 demographic data are presented for every SDFD participant who was tested through EXCITE,  
859 regardless of whether they were also originally tested through SEARCH. As a result, fewer  
860 SDFD participants did not specify their ethnicity or race, as compared to healthcare workers  
861 from Scripps Health and Rady (Table 6). SD County is ethnically diverse, with 34.1% of the  
862 population identifying as Hispanic (<https://www.census.gov/>). However, only 15.3% of the  
863 participants in this study selected Hispanic as their ethnicity. It is possible that the population in  
864 our study is not representative of the population of SD County, but it is also possible that

865 Hispanic participants were less likely to report their ethnicity. There are many reasons why  
866 people choose not to divulge this information in their medical or employment records, or when  
867 participating in studies, including confusion over what category they fall into (especially when  
868 there are limited and pre-specified categories from which to choose) as well as fear of  
869 marginalization or receiving unequal quality of care (49). Additionally, both race and ethnicity  
870 having been combined into a single “check all that apply” question for the SEARCH study likely  
871 caused additional confusion. Most people who selected both a race and an ethnicity identified  
872 as White and Hispanic. In the case of the SEARCH study, it may not have been clear to  
873 participants that they were meant to select more than one option, and therefore most  
874 participants selected the one answer they identified most strongly with.

875 More healthcare workers identified as Asian (16.9% for Scripps Health and 11.9% for  
876 Rady, as compared to 2.7% for SDFD), while more SDFD participants identified as Other/Mixed  
877 Race (9.0% for SDFD, compared to 2.0% for Scripps Health and 1.6% for Rady). In all three  
878 populations, the majority of participants identified as White (44.8%, 47.7%, and 72.9% for  
879 Scripps Health, Rady, and SDFD, respectively). However, direct comparisons between  
880 healthcare workers and SDFD first responders may be inappropriate, since the methods used to  
881 obtain demographic information were different for these populations. Overall, participants  
882 identifying as White, Black/African American, and Other/Mixed Race were more likely to test  
883 positive ( $p = 0.03$ ), but no differences were observed when separated by source (Table 6). Non-  
884 Hispanic SDFD participants were more likely to test positive than Hispanic or Unspecified  
885 participants ( $p = 0.02$ ), but no similar differences were observed among healthcare workers.

886

**A** Age distribution of participants (n=6672)

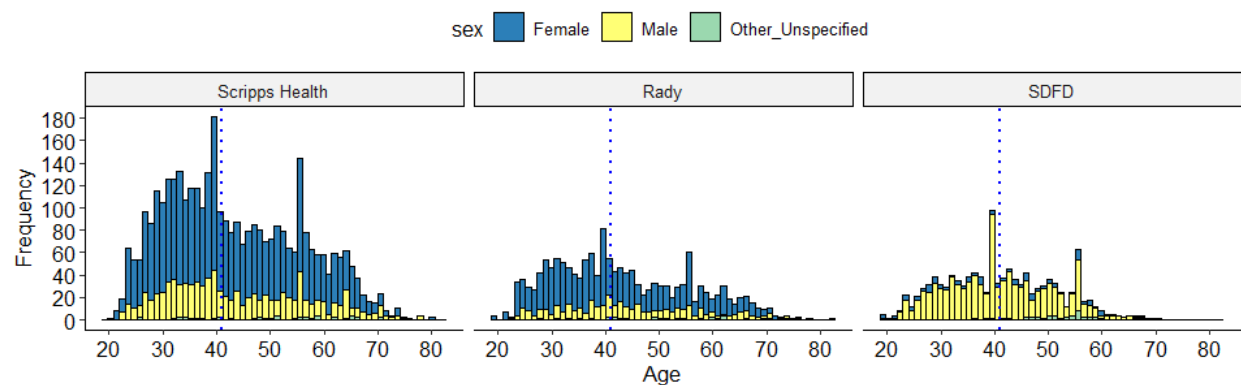

**B** Age distribution of positive participants (n=51)

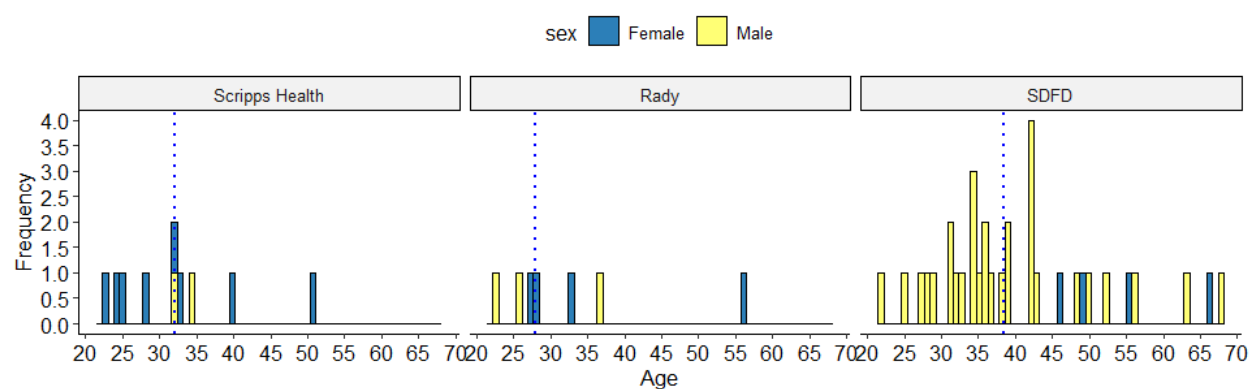

887  
888 **Fig 6.** Age and sex distribution of (A) all participants and (B) positive participants from Scripps  
889 Health and Rady healthcare systems, and from the San Diego Fire-Rescue Department  
890 (SDFD). SEARCH participants who selected UCSD as their employer were excluded from this  
891 Fig because they were not a targeted population for the SEARCH study. The dotted line in each  
892 plot represents the median age.

893 **Table 6.** Demographic information of SEARCH healthcare worker participants (Scripps Health, Rady) and the San Diego Fire-  
894 Rescue Department (SDFD) first responders. Participants who selected UCSD as their employer are included in the Overall  
895 category. The Positive column includes individuals who tested positive for COVID-19 at least once, while the Negative column  
896 includes individuals who never tested positive. Chi-square and *t*-tests were performed to test for differences among groups.  
897 Differences were considered significant at  $p \leq 0.05$  and are indicated in bold. The first column (Total) was not included in statistical  
898 analysis and was included to show the demographics of the entire population, regardless of test result.

|                        | Total             | Overall           |                   |                    | Scripps          |                   |                 | Rady              |                   |                 | SDFR                |                   |                 |
|------------------------|-------------------|-------------------|-------------------|--------------------|------------------|-------------------|-----------------|-------------------|-------------------|-----------------|---------------------|-------------------|-----------------|
|                        |                   | Positive          | Negative          | <i>p</i> -value    | Positive         | Negative          | <i>p</i> -value | Positive          | Negative          | <i>p</i> -value | Positive            | Negative          | <i>p</i> -value |
| Age, mean (SD), median | 42.7 (12.1)<br>41 | 38.0 (11.4)<br>35 | 42.7 (12.1)<br>41 | <b>0.005</b>       | 32.2 (8.4)<br>32 | 43.3 (12.4)<br>41 | <b>0.005</b>    | 32.9 (11.2)<br>28 | 43.1 (12.5)<br>41 | <b>0.03</b>     | 40.7 (11.5)<br>38.5 | 41.2 (10.2)<br>41 | 0.79            |
| Age, n (%)             |                   |                   |                   |                    |                  |                   |                 |                   |                   |                 |                     |                   |                 |
| < 30                   | 947 (14.6)        | 13 (1.4)          | 934 (98.6)        | 0.07               | 4 (0.8)          | 494 (99.2)        | 0.15            | <b>4 (1.7)</b>    | 229 (98.3)        | <b>0.04</b>     | 5 (2.9)             | 165 (97.1)        | 0.14            |
| 30-39                  | 2027 (31.3)       | 20 (1.0)          | 2007 (99.0)       |                    | 4 (0.3)          | 1156 (99.7)       |                 | 2 (0.4)           | 471 (99.6)        |                 | 14 (3.9)            | 345 (96.1)        |                 |
| 40-49                  | 1562 (24.2)       | 9 (0.6)           | 1553 (99.4)       |                    | 1 (0.1)          | 815 (99.9)        |                 | 0 (0.0)           | 381 (100.0)       |                 | 8 (2.3)             | 345 (97.7)        |                 |
| 50-59                  | 1224 (18.9)       | 6 (0.5)           | 1218 (99.5)       |                    | 1 (0.1)          | 702 (99.9)        |                 | 1 (0.4)           | 271 (99.6)        |                 | 4 (1.7)             | 235 (98.3)        |                 |
| 60+                    | 707 (10.9)        | 3 (0.4)           | 704 (99.6)        |                    | 0 (0.0)          | 466 (100.0)       |                 | 0 (0.0)           | 204 (100.0)       |                 | 3 (8.6)             | 32 (91.4)         |                 |
| Race, n (%)            |                   |                   |                   |                    |                  |                   |                 |                   |                   |                 |                     |                   |                 |
| Unspecified            | 1926 (28.4)       | 10 (0.5)          | 1916 (99.5)       | <b>0.03</b>        | 6 (0.5)          | 1183 (99.5)       | 0.19            | 4 (0.7)           | 586 (99.3)        | 0.70            | 0 (0.0)             | 114 (100.0)       | 0.06            |
| White                  | 3432 (50.6)       | <b>30 (0.9)</b>   | 3402 (99.1)       |                    | 1 (0.1)          | 1719 (99.9)       |                 | 3 (0.4)           | 795 (99.6)        |                 | 26 (3.1)            | 821 (96.9)        |                 |
| Black/AA               | 173 (2.6)         | <b>4 (2.3)</b>    | 169 (97.7)        |                    | 0 (0.0)          | 102 (100.0)       |                 | 0 (0.0)           | 32 (100.0)        |                 | 4 (10.3)            | 35 (89.7)         |                 |
| Other/mixed            | 210 (3.1)         | <b>4 (1.9)</b>    | 206 (98.1)        |                    | 0 (0.0)          | 77 (100.0)        |                 | 0 (0.0)           | 27 (100.0)        |                 | 4 (3.9)             | 100 (96.1)        |                 |
| Asian                  | 892 (13.1)        | 3 (0.3)           | 889 (99.7)        |                    | 3 (0.5)          | 647 (99.5)        |                 | 0 (0.0)           | 199 (100.0)       |                 | 0 (0.0)             | 31 (100.0)        |                 |
| Indigenous/NA          | 20 (0.3)          | 0 (0.0)           | 20 (100.0)        |                    | 0 (0.0)          | 13 (100.0)        |                 | 0 (0.0)           | 4 (100.0)         |                 | 0 (0.0)             | 3 (100.0)         |                 |
| Pacific Islander       | 133 (2.0)         | 0 (0.0)           | 133 (100.0)       |                    | 0 (0.0)          | 88 (100.0)        |                 | 0 (0.0)           | 21 (100.0)        |                 | 0 (0.0)             | 24 (100.0)        |                 |
| Ethnicity, n (%)       |                   |                   |                   |                    |                  |                   |                 |                   |                   |                 |                     |                   |                 |
| Unspecified            | 4891 (72.1)       | 11 (0.2)          | 4880 (99.8)       | <b>&lt; 0.0001</b> | 6 (0.2)          | 3254 (99.8)       | 0.10            | 5 (0.4)           | 1361 (99.6)       | 0.39            | 0 (0.0)             | 169 (100.0)       | <b>0.02</b>     |
| Hispanic               | 1036 (15.3)       | <b>11 (1.1)</b>   | 1025 (98.9)       |                    | 4 (0.7)          | 554 (99.3)        |                 | 2 (0.7)           | 294 (99.3)        |                 | 5 (3.0)             | 161 (97.0)        |                 |
| Non-Hispanic           | 859 (12.7)        | <b>29 (3.4)</b>   | 830 (96.6)        |                    | 0 (0.0)          | 21 (100.0)        |                 | 0 (0.0)           | 9 (100.0)         |                 | <b>29 (3.5)</b>     | 798 (96.5)        |                 |
| Sex, n (%)             |                   |                   |                   |                    |                  |                   |                 |                   |                   |                 |                     |                   |                 |
| Female                 | 4270 (62.9)       | 16 (0.4)          | 4254 (99.6)       | <b>&lt; 0.0001</b> | 8 (0.3)          | 2822 (99.7)       | 1.00            | 4 (0.3)           | 1244 (99.7)       | 0.47            | 4 (3.0)             | 129 (97.0)        | 0.78            |
| Male                   | 2373 (35.0)       | <b>35 (1.5)</b>   | 2338 (98.5)       |                    | 2 (0.2)          | 950 (99.8)        |                 | 3 (0.8)           | 380 (99.2)        |                 | 30 (3.0)            | 957 (97.0)        |                 |
| Other/unspecified      | 143 (2.1)         | 0 (0.0)           | 143 (100.0)       |                    | 0 (0.0)          | 57 (100.0)        |                 | 0 (0.0)           | 40 (100.0)        |                 | 0 (0.0)             | 42 (100.0)        |                 |

900 Participant-provided zip codes of residence were overlaid on a map of SD County (Fig  
901 7). Study participants were spread throughout the County, with the highest concentration in San  
902 Diego and the communities slightly further north towards La Jolla, which was expected given  
903 that many of the healthcare systems monitored in this study are located in or near these  
904 regions. However, the broad distribution of participants across SD County suggests that the  
905 mobile testing sites were successful in enabling a more representative population to participate.  
906 The distribution of positive participants largely matched the overall distribution of participants,  
907 with concentrations in more heavily tested/populated areas. We note that even when  
908 participants chose to be tested multiple times, they are represented only once in Fig 7.

909 (A)

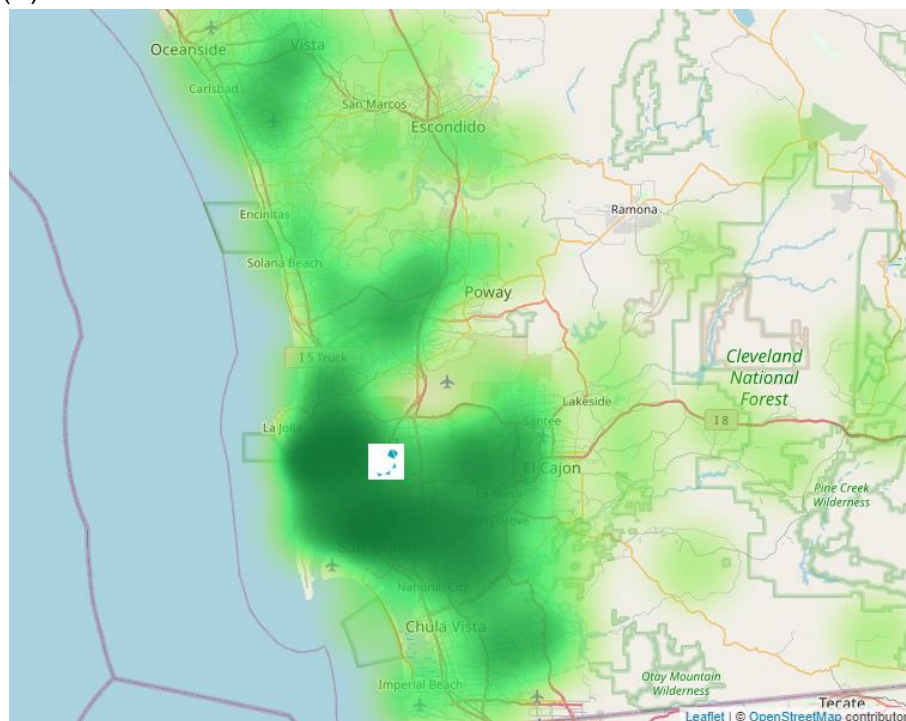

910  
911 (B)

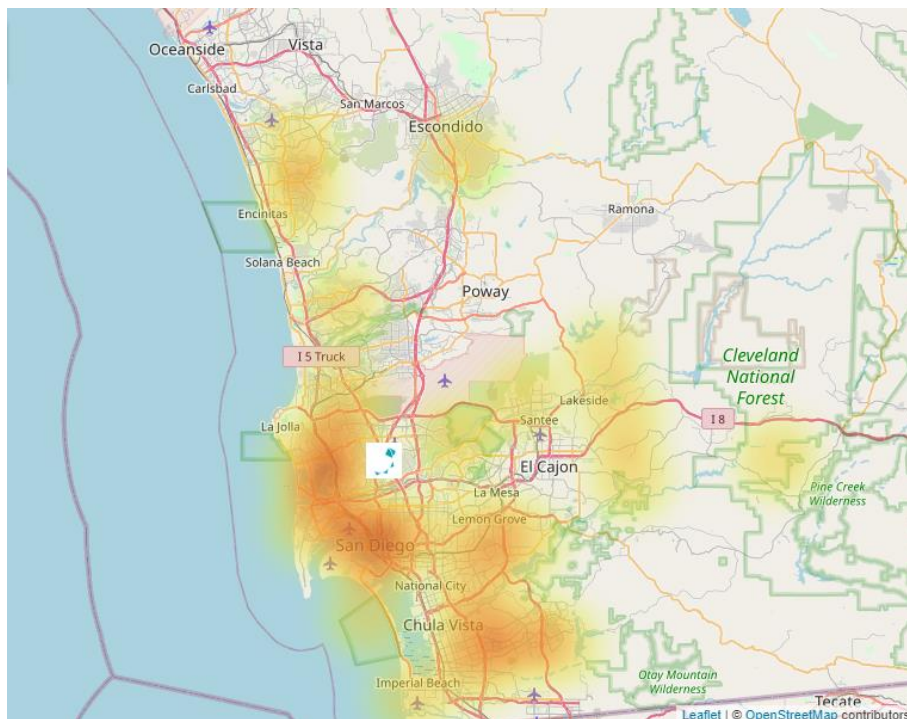

912  
913 **Fig 7.** Zip codes of residence of (A) all healthcare worker and first responder participants tested  
914 through the SEARCH study and EXCITE lab, and (B) all healthcare worker and first responder  
915 participants who tested positive for COVID-19. The deepness of color is proportionate to the  
916 number of participants who chose that zip code as their area of residence. The icon on both  
917 images represents the location of Rady Children's Hospital San Diego, where the permanent  
918 testing location was established during the SEARCH study.

919

## 920 **UCSD and Preschool-Grade 12 Schools**

### 921 **Population Demographics**

922 Data from UCSD, 11 private preschool-grade 12 (P-12) schools, and a group of 13  
923 public P-12 schools located in SD County are included in this section. All participants were  
924 tested via the EXCITE lab at UCSD, and this section contains data from 27,252 individuals, with  
925 21,221 coming from UCSD, 1,281 coming from public P-12 schools, and 4,750 coming from  
926 private P-12 schools. Because EXCITE was designed for repeated testing of asymptomatic  
927 populations, the majority of participants (81.7%) were tested on multiple occasions, some over  
928 40 times (Fig S6b). The participants who tested most frequently were likely a combination of

929 EXCITE lab employees and UCSD student athletes, who were required to test frequently to  
930 decrease the chance that their activities would be interrupted due to COVID-19 infections.

931 Demographic information was obtained from the participants. In this section, each  
932 participant was counted once, regardless of how many times they participated in testing; for  
933 positivity status, “positive” participants are those who tested positive through EXCITE at least  
934 once, while “negative” participants are those who never tested positive. For UCSD participants,  
935 demographic information was gathered from pre-existing student/employee records. For P-12  
936 school participants, demographic information was gathered either as part of the consent  
937 process for participation in this testing program, from student/employee records, or a  
938 combination of the two. The median age was 22 for UCSD participants, 11 for public school  
939 participants, and 16 for private school participants (Fig 8, Table 7). Most participants from each  
940 group belonged to the ‘student’ age ranges appropriate for each educational facility. Overall,  
941 participants were evenly split between male and female; however, within the P-12 schools, sex  
942 was evenly split for student age ranges but skewed female for adult (teachers and staff) age  
943 ranges (Fig 8). We found no differences in positivity rate by sex, overall or within any of the  
944 three populations studied. Our finding was similar to the overall case reporting by sex by SD  
945 County (<https://www.sandiegocounty.gov/>). However, SD County did report a higher fatality rate  
946 for males than for females, and previous research investigating sex disparities also found that  
947 while males are not more likely to test positive, they are more likely to be hospitalized or die  
948 from COVID-19 (50). We have no information on whether any of the participants testing positive  
949 through the EXCITE lab were hospitalized.

950 Adults 19+ were overall more likely to test positive than younger age groups ( $p <$   
951  $0.0001$ ), partly because the majority of the participants were adults from UCSD (Table 7). While  
952 almost all UCSD participants were aged 19+, the average age of people testing positive at  
953 UCSD was slightly lower than those testing negative (25.2 vs. 26.4, respectively;  $p = 0.002$ ). For  
954 private school participants, we found that students tested positive less frequently than adults,



955 but this trend was not extended to public school participants. At private schools, adults were  
956 more likely to test positive than children (2.3% of adults as compared to 1.0% of children,  $p =$   
957 0.002), but at public schools, children aged 11-13 were the most likely to test positive ( $p = 0.04$ ).  
958 This could be due to differences in testing uptake by the schools: for most private schools,  
959 students and staff who attended in-person learning at school were required to participate in  
960 regular testing, but for public schools, participation was voluntary. This testing program was  
961 designed for asymptomatic screening, and participants who felt sick were discouraged from  
962 coming to school and were encouraged to seek testing from SD County testing sites or primary  
963 care providers. Therefore, these data do not show the complete picture, but they do show that  
964 with proper protective measures, students attending in-person schooling are not testing positive  
965 more frequently than the general population (Fig 3), and in the case of the private schools in this  
966 study, may be testing positive less frequently than adults in the same settings. Our private  
967 school results are similar to other studies, which have also shown that transmission rates in  
968 schools are low (5,6), and that students were less likely to test positive than staff in educational  
969 settings (8). Also of note, there were no outbreaks in participating schools in this study that were  
970 attributable to in-school transmission. The low positivity among school-aged children provides  
971 an argument for opening P-12 schools for in-person learning; with teachers and some school-  
972 aged children eligible for vaccination across the US, and children representing the age group  
973 that is currently least likely to test positive, our study and others suggest that schools can re-  
974 open with minimal risk of community transmission (5–8). However, it should be noted that the  
975 low rate of positivity among children observed at the County level (Fig 2) could be a result of  
976 school closures during this time, which would have drastically reduced the number of contacts  
977 each child would have.  
978

**A** Age distribution of participants (n=27252)

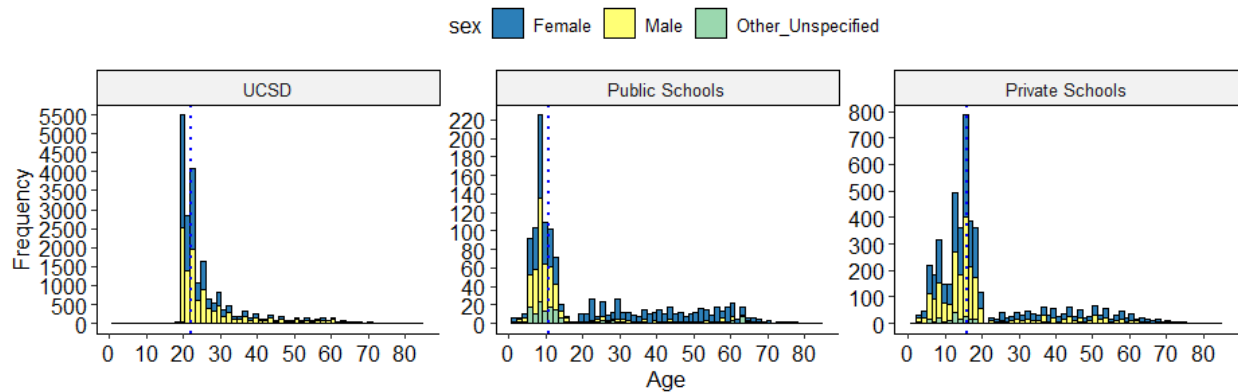

**B** Age distribution of positive participants (n=664)

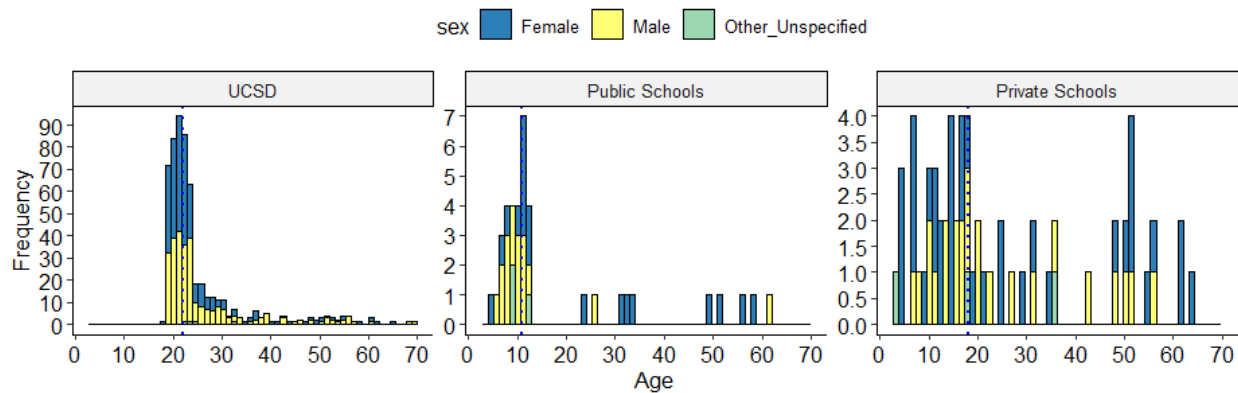

979  
980 **Fig 8.** Age and sex distribution of (A) all EXCITE UCSD/school participants, and (B) all COVID-  
981 19 positive participants from the same population. The dotted line in each plot represents the  
982 median age.

983  
984 A large proportion of participants chose not to identify their race (39.9%) or ethnicity  
985 (60.9%) (Table 7). Across all three populations studied, approximately 40% of participants did  
986 not report their race, but the reporting of ethnicity varied by population: two-thirds (67%) of  
987 UCSD participants did not report their ethnicity, compared to ~40% of private school participants  
988 and just ~20% of public school participants. Because UCSD student/employee records default  
989 to unspecified race and ethnicity unless a participant changes their status themselves, or their  
990 status is changed by a healthcare worker during a medical visit, this could account for a  
991 significant proportion of the participants who did not report a race or ethnicity. However, the  
992 discrepancy between race reporting and ethnicity reporting at UCSD suggests that there is a  
993 portion of this population reporting race, but declining to report ethnicity. Similar proportions of

994 participants did not report their race at both public and private schools, but twice as many  
995 private school participants (proportionally) declined to report their ethnicity. As with the  
996 SEARCH study, legal status in the US was not a requirement for participation in the EXCITE  
997 testing program, nor was it a question asked of potential participants.

998 More UCSD participants identified as Asian (22.4%, as compared to 7.6% and 4.1% for  
999 private and public schools, respectively), while more P-12 school participants identified as White  
1000 (44.9% and 46.7% for private and public schools, respectively, as compared to 22.9% for  
1001 UCSD). While the overall number of participants identifying as Black/African American,  
1002 Indigenous/Native American, or Pacific Islander was comparatively low, more public school  
1003 participants selected these options as their race identity (Table 7). Additionally, approximately  
1004 half of public school participants identified as Hispanic, compared to just 6.8% of UCSD and  
1005 private school participants (Table 7). Overall, participants identifying as Black/African American  
1006 or Other/Mixed Race were more likely to have a positive test, as well as those with an  
1007 unspecified race ( $p < 0.0001$ ), although when separated by group the result was not statistically  
1008 significant for P-12 schools. Additionally, participants identifying as Hispanic were also more  
1009 likely to test positive, although this difference was only statistically significant for UCSD  
1010 participants ( $p < 0.0001$ ), not for P-12 schools. Even though the result was not statistically  
1011 significant, there was a trend toward a larger proportion of Black/African American and Hispanic  
1012 participants from the public schools testing positive for COVID-19 (Table 7). Similar racial and  
1013 ethnic disparities have been noted previously by other researchers, highlighting the  
1014 disproportionate toll the COVID-19 pandemic has had on already-marginalized population in the  
1015 US (51–55). In particular, Gil et al. (51) identified potential reasons why Hispanic people may  
1016 test positive for COVID-19 more frequently, including: higher rates of coexisting medical  
1017 conditions; lower rates of health insurance; immigration status; and language barriers. Similarly,  
1018 Millett et al. (54) note that counties with a larger Black population were also more likely to have  
1019 higher rates of air pollution, comorbidities, and lower rates of health insurance. Factors such as

1020 language barriers and lack of health insurance prevent access to testing or hospital care, while  
1021 factors such as air pollution and comorbidities can increase the severity of an infection.

1022 **Table 7.** Demographic information of EXCITE participants. The Positive column includes individuals who tested positive for COVID-  
 1023 19 at least once, while the Negative column includes individuals who never tested positive. Chi-square and *t*-tests were performed to  
 1024 test for differences among groups. Differences were considered significant at  $p \leq 0.05$  and are indicated in bold. The first column  
 1025 (Total) was not included in statistical analysis and was included to show the demographics of the entire population, regardless of test  
 1026 result.

|                        | Total             | Overall           |                   |                    | UCSD             |                   |                    | Public Schools    |                   |                 | Private Schools   |                   |                 |
|------------------------|-------------------|-------------------|-------------------|--------------------|------------------|-------------------|--------------------|-------------------|-------------------|-----------------|-------------------|-------------------|-----------------|
|                        |                   | Positive          | Negative          | <i>p</i> -value    | Positive         | Negative          | <i>p</i> -value    | Positive          | Negative          | <i>p</i> -value | Positive          | Negative          | <i>p</i> -value |
| Age, mean (SD), median | 25.1 (11.9)<br>22 | 24.8 (10.9)<br>22 | 25.2 (11.9)<br>22 | 0.95               | 25.2 (9.1)<br>22 | 26.4 (10.1)<br>22 | <b>0.002</b>       | 18.1 (16.3)<br>11 | 21.8 (18.9)<br>11 | 0.63            | 25.1 (17.8)<br>18 | 20.7 (15.3)<br>16 | <b>0.05</b>     |
| Age group, n (%)       |                   |                   |                   |                    |                  |                   |                    |                   |                   |                 |                   |                   |                 |
| 2-10                   | 1497 (5.5)        | 30 (2.0)          | 1467 (98.0)       | <b>&lt; 0.0001</b> | --               | --                | 1.00               | 17 (3.1)          | 535 (96.9)        | <b>0.04</b>     | 13 (1.4)          | 932 (98.6)        | <b>0.002</b>    |
| 11-13                  | 814 (3.0)         | 18 (2.2)          | 796 (97.8)        |                    | --               | --                |                    | <b>11 (6.4)</b>   | 162 (93.6)        |                 | 7 (1.1)           | 634 (98.9)        |                 |
| 14-18                  | 1989 (7.3)        | 15 (0.8)          | 1974 (99.2)       |                    | 1 (1.7)          | 57 (98.3)         |                    | 0 (0.0)           | 32 (100.0)        |                 | 14 (0.7)          | 1885 (99.3)       |                 |
| 19+                    | 22829 (84.2)      | <b>597 (2.6)</b>  | 22232 (97.4)      |                    | 558 (2.6)        | 20574 (97.4)      |                    | 10 (2.2)          | 445 (97.8)        |                 | <b>29 (2.3)</b>   | 1213 (97.7)       |                 |
| Race, n (%)            |                   |                   |                   |                    |                  |                   |                    |                   |                   |                 |                   |                   |                 |
| Unspecified            | 10866 (39.9)      | <b>294 (2.7)</b>  | 10572 (97.3)      | <b>&lt; 0.0001</b> | <b>253 (2.9)</b> | 8329 (97.1)       | <b>&lt; 0.0001</b> | 17 (3.2)          | 519 (96.8)        | 0.35            | 24 (1.4)          | 1724 (98.6)       | 0.54            |
| White                  | 7601 (27.9)       | 149 (2.0)         | 7452 (98.0)       |                    | 102 (2.1)        | 4766 (97.9)       |                    | 17 (2.8)          | 581 (97.2)        |                 | 30 (1.4)          | 2105 (98.6)       |                 |
| Black/AA               | 497 (1.8)         | <b>14 (2.8)</b>   | 483 (97.2)        |                    | 9 (2.6)          | 339 (97.4)        |                    | 5 (8.5)           | 54 (91.5)         |                 | 0 (0.0)           | 90 (100.0)        |                 |
| Other/mixed            | 2940 (10.8)       | <b>109 (3.7)</b>  | 2831 (96.3)       |                    | <b>103 (4.0)</b> | 2454 (96.0)       |                    | --                | --                |                 | 6 (1.6)           | 377 (98.4)        |                 |
| Asian                  | 5166 (19.0)       | 96 (1.9)          | 5070 (98.1)       |                    | 91 (1.9)         | 4659 (98.1)       |                    | 1 (1.9)           | 52 (98.1)         |                 | 4 (1.1)           | 359 (98.9)        |                 |
| Indigenous/NA          | 108 (0.4)         | 2 (1.8)           | 106 (98.2)        |                    | 1 (1.4)          | 70 (98.6)         |                    | 0 (0.0)           | 19 (100.0)        |                 | 1 (5.6)           | 17 (98.4)         |                 |
| Pacific Islander       | 74 (0.3)          | 0 (0.0)           | 74 (100.0)        |                    | 0 (0.0)          | 45 (100.0)        |                    | 0 (0.0)           | 16 (100.0)        |                 | 0 (0.0)           | 13 (100.0)        |                 |
| Ethnicity, n (%)       |                   |                   |                   |                    |                  |                   |                    |                   |                   |                 |                   |                   |                 |
| Unspecified            | 16601 (60.9)      | 403 (2.4)         | 16198 (97.6)      | <b>&lt; 0.0001</b> | 372 (2.6)        | 14100 (97.4)      | <b>&lt; 0.0001</b> | 8 (2.8)           | 278 (97.2)        | 0.35            | 23 (1.3)          | 1820 (98.7)       | 0.13            |
| Hispanic               | 2398 (8.8)        | <b>103 (4.3)</b>  | 2295 (95.7)       |                    | <b>71 (4.9)</b>  | 1376 (95.1)       |                    | 24 (3.8)          | 606 (96.2)        |                 | 8 (2.5)           | 313 (97.5)        |                 |
| Non-Hispanic           | 8253 (30.3)       | 158 (1.9)         | 8095 (98.1)       |                    | 116 (2.2)        | 5186 (97.8)       |                    | 8 (2.2)           | 357 (97.8)        |                 | 34 (1.3)          | 2552 (98.7)       |                 |
| Sex, n (%)             |                   |                   |                   |                    |                  |                   |                    |                   |                   |                 |                   |                   |                 |
| Female                 | 13367 (49.1)      | 336 (2.5)         | 13031 (97.5)      | 0.50               | 279 (2.7)        | 9904 (97.3)       | 0.65               | 20 (2.8)          | 688 (97.2)        | 0.33            | 37 (1.5)          | 2439 (98.5)       | 0.73            |
| Male                   | 13332 (48.9)      | 318 (2.4)         | 13014 (97.6)      |                    | 276 (2.5)        | 10597 (97.5)      |                    | 17 (4.1)          | 399 (95.9)        |                 | 25 (1.2)          | 2018 (98.8)       |                 |
| Other/unspecified      | 553 (2.0)         | 10 (1.8)          | 543 (98.2)        |                    | 4 (2.4)          | 161 (97.6)        |                    | 3 (1.9)           | 154 (98.1)        |                 | 3 (1.3)           | 228 (98.7)        |                 |

1027

1028 Participant-provided zip codes of residence were overlaid on a map of SD County (Fig  
1029 9). Participants involved in testing through the EXCITE lab came from all across SD County. For  
1030 P-12 schools, testing was conducted on-site at each school, and for UCSD participants, testing  
1031 was conducted on campus. Participant density was highest in regions surrounding UCSD in La  
1032 Jolla, with densely tested regions extending north and south along the coast away from UCSD,  
1033 and decreasing in density when moving inland and when approaching the US-Mexico border  
1034 (Fig 9a). Interestingly, participants who tested positive did not necessarily follow the same  
1035 density pattern as overall testing (Fig 9b). The highest density of positive participants was  
1036 located around UCSD, which was expected given the large proportion of on-campus students  
1037 participating in testing through the EXCITE lab. Apart from the UCSD campus, the areas with  
1038 the highest proportion of positive participants included San Diego, National City, and Chula  
1039 Vista, all located south of UCSD. Areas such as Encinitas and Solana Beach, to the north of  
1040 UCSD, were heavily tested, but represented a disproportionately small portion of positive  
1041 participants. Conversely, Chula Vista was not heavily tested, but represented a  
1042 disproportionately large portion of positive participants. There are many possible explanations  
1043 for this discrepancy. Median household income (2019) in Encinitas and Chula Vista was  
1044 \$116,022 and \$81,272, respectively (<https://www.census.gov/>). A previous study found that a  
1045 decrease of \$10,000 median household income in New York City was correlated with a 1.6%  
1046 increase in COVID-19 positivity rate (55). If this correlation is applied to San Diego County, we  
1047 would expect positivity rates to be approximately 5.4% higher in Chula Vista as compared to  
1048 Encinitas. This same study found an increase in COVID-19 positivity in more densely populated  
1049 areas (55); these areas are more likely to have multi-family housing such as apartment  
1050 buildings, where physical distancing is more challenging. In Encinitas, population density in  
1051 2010 was 3,164 people per square mile, while in Chula Vista, population density was 4,915/sq  
1052 mi (<https://www.census.gov/>). Chula Vista also has significantly more Black/African American

1053 and Hispanic residents as compared to Encinitas, and both of these communities have been  
1054 identified by previous studies as being at higher risk for COVID-19, as discussed above.

1055 (A)

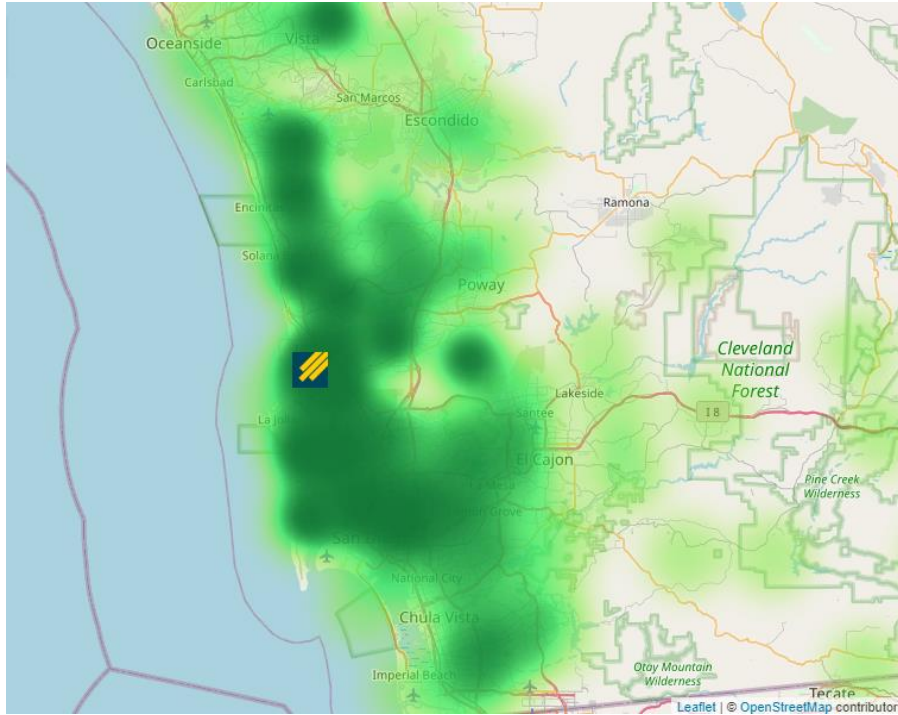

1056  
1057

(B)

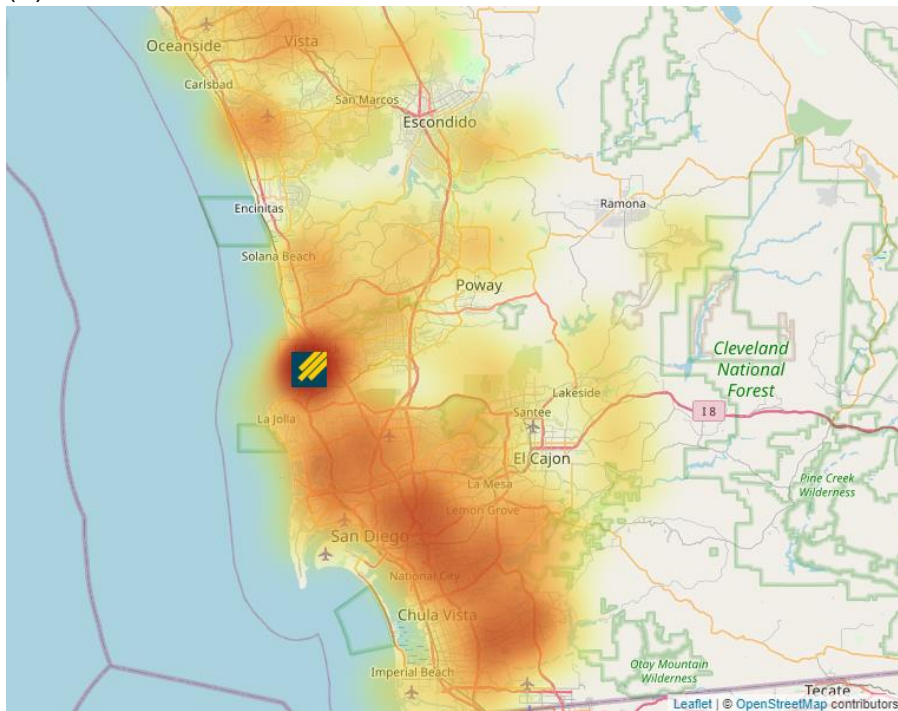

1058  
1059  
1060

**Fig 9.** Zip codes of residence of (A) all UCSD/P-12 school participants tested through the EXCITE lab, and (B) UCSD/P-12 school participants who tested positive for COVID-19 through



1061 the EXCITE lab. The deepness of color is proportionate to the number of participants who chose  
1062 that zip code as their area of residence. Zip codes from outside of San Diego County were  
1063 assumed to belong to UCSD students living on-campus who provided their home address, and  
1064 were re-assigned as such. The icon on both images represents the location of the UCSD  
1065 campus.  
1066

## 1067 **Return to Learn at UCSD**

1068         During the fall 2020 quarter, UCSD housed 9,129 on-campus students, and COVID-19  
1069 testing on a bi-weekly basis was mandatory for any students who lived in campus owned  
1070 housing or came to campus for classes. Student athletes were tested weekly when training, and  
1071 more often when competing. During the fall quarter, 6% of classes were taught in-person, with a  
1072 maximum in-person class size of 50, but this was reduced to 2% of classes in-person mid-  
1073 quarter as SD County restrictions on indoor teaching were implemented. Following County  
1074 restrictions on indoor teaching, all in-person classes were moved to outdoor settings, with large  
1075 tents acting as outdoor classrooms. Testing was provided free-of-charge to students, faculty,  
1076 and staff, and while testing was not mandatory for faculty and staff, it was recommended. High-  
1077 volume testing sites for students moving on-campus were set up at the beginning of each  
1078 quarter, and student move-in was staggered to allow for adequate testing and social distancing.  
1079 Testing at term start among students moving/returning to campus-owned housing was provided  
1080 at days 1 and 10 in the fall quarter. Sequestration (masking in all areas including in residences  
1081 with the exception of when inside a single bedroom or bathroom) was implemented during the  
1082 move in testing period.

1083         Students living on-campus who tested positive at term start or at any point thereafter  
1084 were given options on how to self-isolate for the required 14 days before being allowed to move  
1085 into/return to their residential suites. Many students availed themselves of the temporary  
1086 isolation housing that was provided on campus, while others chose to return home to isolate,  
1087 and some, mainly graduate students, chose to isolate in their campus residence with their

1088 families or alone (this option was not presented to students living in shared housing). Students  
1089 living off-campus who tested positive could remain in their homes if they could effectively isolate  
1090 themselves from others, or were provided isolation housing on campus if desired.

1091 Masking was required in all public spaces on campus, both indoors and outdoors, and  
1092 beginning mid-way through the fall quarter, students were allowed to gather in groups of three  
1093 for up to two hours at a time, provided everyone was outdoors, masked, and socially distanced.  
1094 At certain points throughout the quarter, cases rose and students were required to sequester  
1095 temporarily. Bi-weekly asymptomatic testing was accomplished via the installation of vending  
1096 machines throughout campus that supplied COVID-19 testing kits containing a collection tube  
1097 pre-filled with media, a swab, and instructions on how to self-collect, as well as drop-off bins,  
1098 from which samples were collected multiple times per day for processing by the EXCITE lab. If  
1099 at any point a student developed symptoms characteristic of COVID-19, they were tested via  
1100 the CALM lab on campus and asked to self-isolate until their test results were returned.

1101 Integration of the testing program with two smartphone applications - the UCSD  
1102 student/employee app and the UCSD Health EPIC Electronic Health Record MyChart app -  
1103 allowed for an easy method for linking test tube barcodes with student/employee ID numbers,  
1104 and provided students and employees with their test results, whether they were negative or  
1105 positive. Individuals with positive test results also received a telephone call from a clinical  
1106 provider at UCSD Health, and were contacted daily during the isolation period. Most results  
1107 were returned the day after sample collection. We believe this combination of quick turnaround  
1108 time and the return of results for every sample increased compliance, because it provided  
1109 continuous feedback to students and employees.

1110 The number of students residing on campus decreased after the Thanksgiving 2020  
1111 weekend, because students who left for the holiday were incentivized (with partial refunds of  
1112 housing costs) to remain at home until the winter quarter started in January 2021. This measure  
1113 aimed to reduce an influx of new COVID-19 cases from students who gathered with other

1114 households over the Thanksgiving weekend. Students returning to campus from fall break were  
1115 tested at days 1, 5, and 10 after return. Between Thanksgiving and the beginning of the winter  
1116 quarter, weekly testing was encouraged but not mandatory, while bi-weekly testing remained  
1117 mandatory.

1118         When the winter quarter began in early January 2021, student move-in was again  
1119 staggered to allow for all students to get tested and to prevent crowding; students were also  
1120 asked to test themselves on days 1, 3, and 5 after move-in, after which time weekly testing was  
1121 mandatory for those residing in campus owned housing or coming to campus. During the winter  
1122 quarter, UCSD housed 8700 on-campus students who were required to test weekly, in addition  
1123 to 1850 off-campus students who came to campus for classes, not including student athletes  
1124 who came to campus for training and were required to test more frequently. During the winter  
1125 quarter, 2% of classes were taught in-person, all of which were taught in an outdoor classroom  
1126 setting. In addition to asymptomatic screening by the EXCITE lab, UCSD also offered  
1127 symptomatic and exposure testing via the CALM lab. Together, the EXCITE and CALM labs  
1128 made up the entirety of COVID-19 testing conducted on-campus at UCSD. Testing data from  
1129 the CALM lab were not included in this study.

## 1130 **Return to Learn at Preschool-Grade 12 Schools**

1131         The EXCITE lab collaborated with 11 private schools and a group of 13 public schools in  
1132 SD County to provide repeated screening of students, teachers, and staff. These schools  
1133 offered different in-person learning schedules, with some offering in-person learning five days a  
1134 week and others alternating between in-person and remote learning, with a portion of students  
1135 attending in-person learning on different days. During the timeframe this study took place, the  
1136 large majority of public schools in SD County were fully remote. However, some schools were  
1137 allowed to remain open for in-person learning on a limited basis, based on the CDC's social  
1138 vulnerability index and the California Department of Public Health's (CDPH) Healthy Places

1139 Index (HPI). Public schools that were in the lowest HPI quartile were selected, as they  
1140 represented students from low socio-economic status communities, including many immigrant,  
1141 refugee, and other socially vulnerable communities. Not all students from these communities  
1142 participated in on-site learning; schools offered this choice to children who were struggling with  
1143 remote learning due to their housing situation (homelessness, overcrowded housing, poor wifi)  
1144 and/or those who were struggling academically. For public schools, testing was offered weekly  
1145 but was not mandatory, and compliance was lower for students than for staff at these schools,  
1146 with an average of 68% of students and 92% of staff who consented to testing. For most private  
1147 schools, testing was mandatory in order to attend in-person learning, but remote learning was  
1148 also available to students. The testing schedule varied for each private school, from weekly  
1149 testing to exposure-based testing, but most schools required students and staff to provide a  
1150 negative test before returning to school after breaks and holidays (Table S5). Schools used a  
1151 variety of safety and risk mitigation measures to attempt to ensure the health of those  
1152 participating in in-person learning. We were provided general information for the public schools,  
1153 and more specific information for most participating private schools, detailed in Table S5 and  
1154 summarized below.

1155         At the private schools for which we obtained details of their risk mitigation strategies,  
1156 cohort size ranged from 9-14 students up to the entire grade level. For at least one private  
1157 school, a single positive test within a cohort meant that the entire cohort stayed at home for  
1158 remote learning for two weeks, and contact tracing was used to determine any possible  
1159 exposures outside the cohort. Because this method was quite disruptive for the students,  
1160 administrative staff at this school recommend creating smaller cohort sizes. Desks in  
1161 classrooms were placed at a distance of 4-6 ft (1.2-1.8 m), and while the established  
1162 recommended distance is 6 ft (1.5 m), a recent report that has been adopted by the CDC  
1163 suggests that a 3 ft (0.9 m) spacing may be just as effective at preventing the spread of SARS-  
1164 CoV-2, as long as everyone is masked (56). Masking was required at all times, with exceptions

1165 for very young children and when eating (physically distanced, outside) and napping (for young  
1166 children). For most schools, indoor classrooms were either retrofitted with portable home-made  
1167 HEPA air filtration systems or had upgraded HVAC systems installed with higher-quality air  
1168 filters. Different schools employed different indoor/outdoor instruction methods, with some  
1169 schools teaching exclusively indoors, some teaching almost exclusively in outdoor classrooms,  
1170 and others using a combination, emphasizing mandatory time outdoors. We note that outdoor  
1171 instruction or mandatory outdoor time may not be feasible everywhere, especially in the winter  
1172 months. One private school described one-way walking traffic set up throughout the campus, as  
1173 well as staggering student drop-off and pick-up to prevent crowding. Different schools used  
1174 different methods of contact tracing and daily symptom checking, and all six private schools that  
1175 provided details of their symptom screening policies mentioned using dedicated applications,  
1176 including Eموcha, SchoolPass, and ProCare. These schools also implemented temperature  
1177 checks upon arrival on campus. At the presence of any symptoms of illness, students and staff  
1178 were required to switch to remote teaching until symptoms resolved.

1179         At the public schools, the following extra measures were taken to ensure the health and  
1180 safety of students and staff, following CDC and CDPH guidance: mandatory masking for  
1181 students and staff; grouping students into cohorts to minimize interactions; 6 ft (1.5 m) distance  
1182 between desks; scheduled drop-off and pick-up times; heightened ventilation in classrooms;  
1183 increased sanitization and hand-washing protocols; daily symptom checks and mandatory two-  
1184 week at-home quarantines for students who present symptoms of illness; restricting  
1185 parents/guardians and volunteers from campus; restricting the sharing of materials between  
1186 students. For most of the public schools, a single positive test within a cohort resulted in the  
1187 entire cohort returning to remote learning for two weeks.

1188

1189

## 1190 **Conclusions**

1191           In this study, we developed a high-throughput semi-automated pipeline for RT-qPCR  
1192 detection of SARS-CoV-2, with scalable capacity and rapid turnaround times that was used for  
1193 large-scale repeated asymptomatic screening on an individual basis. This pipeline was first  
1194 used to test more than 6,000 healthcare workers and first responders in San Diego, California in  
1195 the spring of 2020. The pipeline was then modified in the fall of 2020 and used to establish a  
1196 dedicated CLIA-certified COVID-19 testing lab at the University of California, San Diego,  
1197 allowing students and staff to return to campus safely by providing repeated asymptomatic  
1198 screening. Testing was expanded to include firefighters and some preschool-grade 12 schools  
1199 across San Diego County. Thus far, we have tested more than 150,000 nasal swabs from over  
1200 28,000 individuals. More than half of participants who tested positive reported no symptoms at  
1201 the time of testing, highlighting the importance of asymptomatic/pre-symptomatic screening. The  
1202 presence of symptoms was significantly correlated with higher viral load. Hispanic and  
1203 Black/African American participants from UCSD and partnering schools were more likely to test  
1204 positive, highlighting the disproportionate toll the COVID-19 pandemic has had on already-  
1205 marginalized populations within the US. At UCSD and at public schools, students were more  
1206 likely to test positive for COVID-19 than staff. However, in private schools, students were less  
1207 likely to test positive than staff. No correlation between age/sex and viral load was observed.  
1208 We note that the results reported here were obtained during a time period (April 17, 2020 to  
1209 February 5, 2021) when COVID-19 vaccination rates in San Diego were less than 10%. Our  
1210 results suggest that schools ranging from preschool to university may be opened safely, even  
1211 without vaccination, when proper health and safety measures are implemented, such mandatory  
1212 masking, increased desk spacing, reduced cohort size, and repeat testing.

1213

1214

## 1215 **Acknowledgements**

1216 We would like to acknowledge the San Diego COVID Research Enterprise Network (SCREEN)  
1217 Initiative for engineering a 3D printable NP swab and scaling to meet the immediate diagnostic  
1218 demands of the SEARCH study. We thank the RCHSD employees and leadership who  
1219 supported the SEARCH initiative by providing their time and effort to test participants at multiple  
1220 testing sites. We would like to thank the following members of the Altman Clinical &  
1221 Translational Research Institute (ACTRI) for their assistance creating Figs: Melissa Generoso,  
1222 Perry Shipman, Nguyen Trieu. We would like to thank the following people from the University  
1223 of California San Diego (UCSD): Dr. Mana Parast from the Sanford Consortium of Regenerative  
1224 Medicine for the use of her QuantStudio 5 qPCR machine; the members of the UCSD Return to  
1225 Learn (RTL) program; Stosh Ozog, Joanna Coker, and Denis Smirnov from the UCSD School of  
1226 Medicine. We would like to thank the following people from our partnering healthcare facilities  
1227 during the SEARCH study: Cassidy Callahan, Joey Principato, and Kyle McBride from Rady  
1228 Children's Hospital, San Diego; Rowena Carino from the Department of Pathology, Scripps  
1229 Clinic; Aaron Fort, Andrew Ruoff, Jessica Malley, Jamie Rullman, Amanda Beggs, and Gracie  
1230 Gagliano from the Department of Surgery, Division of Transplantation, Scripps Clinic.

## 1231 **Funding**

1232 Funding for the SEARCH study was provided by: the Scripps Health COVID-19 Research Fund  
1233 to CM and Scripps Health collaborators (<https://www.scripps.org/>); a personal donation by the  
1234 Shekhter Family to the SEARCH study initiative, A Centers for Disease Control and Prevention  
1235 (CDC) Broad Agency Announcement (BAA) contract to KGA (contract #75D30120C09795), and  
1236 departmental funds from the UCSD Department of Obstetrics, Gynecology, and Reproductive  
1237 Sciences to LCL (<https://medschool.ucsd.edu/som/obgyn/Pages/default.aspx>). The funders had



1238 no role in study design, data collection and analysis, decision to publish, or preparation of the  
1239 manuscript.

## 1240 **Competing Interests**

1241 Anterior nares swab samples for clinical validation of the Expedited COVID-19 Identification  
1242 Environment (EXCITE) Laboratory Developed Tests (LDT) were donated by Helix Opco, LLC.  
1243 We disclose that Dr. Laurent's spouse is an employee of Helix Opco, LLC.

1244

## 1245 **References**

- 1246 1. Roser M, Ritchie H, Ortiz-Ospina E, Hasell J. Coronavirus Pandemic (COVID-19)  
1247 [Internet]. Our World In Data. 2020 [cited 2020 Jul 7]. Available from:  
1248 <https://ourworldindata.org/coronavirus>
- 1249 2. Sen S, Karaca-Mandic P, Georgiou A. Association of stay-at-home orders with COVID-19  
1250 hospitalization in 4 states. *J Am Med Assoc.* 2020;323(24):2522–3.
- 1251 3. Juneau CE, Pueyo T, Bell M, Gee G, Collazzo P, Potvin L. Evidence-based, cost-  
1252 effective interventions to suppress the COVID-19 pandemic: A systematic review.  
1253 *medRxiv.* 2020;1–27.
- 1254 4. Fowler JH, Hill SJ, Levin R, Obradovich N. The effect of stay-at-home orders on COVID-  
1255 19 cases and fatalities in the United States. *arXiv.* 2020;1–16.
- 1256 5. Dawson P, Worrell MC, Malone S, Tinker SC, Fritz S, Maricque B, et al. Pilot  
1257 Investigation of SARS-CoV-2 Secondary Transmission in Kindergarten Through Grade  
1258 12 Schools Implementing Mitigation Strategies — St. Louis County and City of  
1259 Springfield, Missouri, December 2020. *Morb Mortal Wkly Rep.* 2021;70(12):449–55.
- 1260 6. Macartney K, Quinn HE, Pillsbury AJ, Koirala A, Deng L, Winkler N, et al. Transmission of  
1261 SARS-CoV-2 in Australian educational settings: a prospective cohort study. *Lancet Child  
1262 Adolesc Heal.* 2020;4:807–16.
- 1263 7. Panovska-Griffiths J, Kerr CC, Stuart RM, Mistry D, Klein DJ, Viner RM, et al.  
1264 Determining the optimal strategy for reopening schools, the impact of test and trace  
1265 interventions, and the risk of occurrence of a second COVID-19 epidemic wave in the UK:  
1266 a modelling study. *Lancet Child Adolesc Heal.* 2020;4:817–27.
- 1267 8. Ladhani SN, Baawuah F, Beckmann J, Okike IO, Ahmad S, Garstang J, et al. SARS-  
1268 CoV-2 infection and transmission in primary schools in England in June-December, 2020  
1269 (sKIDs): an active, prospective surveillance study. *Lancet Child Adolesc Heal* [Internet].  
1270 2021;1–11. Available from: [https://doi.org/10.1016/S2352-4642\(21\)00061-4](https://doi.org/10.1016/S2352-4642(21)00061-4)
- 1271 9. Gandhi M, Yokoe DS, Havlir D V. Asymptomatic Transmission, the Achilles' heel of  
1272 current strategies to control Covid-19. *N Engl J Med.* 2020;382(22):2158–60.
- 1273 10. Benefield AE, Skrip LA, Clement A, Althouse RA, Chang S, Althouse BM. SARS-CoV-2  
1274 viral load peaks prior to symptom onset: a systematic review and individual-pooled  
1275 analysis of coronavirus viral load from 66 studies. *medRxiv.* 2020;1–23.
- 1276 11. Oran DP, Topol EJ. Prevalence of Asymptomatic SARS-CoV-2 Infection. *Ann Intern Med.*  
1277 2020;1–7.
- 1278 12. Gudbjartsson DF, Helgason A, Jonsson H, Magnusson OT, Melsted P, Norddahl GL, et  
1279 al. Spread of SARS-CoV-2 in the Icelandic population. *N Engl J Med.*

- 1280 2020;382(24):2302–15.
- 1281 13. Lavezzo E, Franchin E, Ciavarella C, Cuomo-Dannenburg G, Barzon L, Del Vecchio C, et al. Suppression of COVID-19 outbreak in the municipality of Vo, Italy. medRxiv [Internet]. 1282 2020;1–23. Available from:
- 1283 <https://www.medrxiv.org/content/10.1101/2020.04.17.20053157v1>
- 1284
- 1285 14. Arons MM, Hatfield KM, Reddy SC, Kimball A, James A, Jacobs JR, et al.
- 1286 Presymptomatic SARS-CoV-2 Infections and Transmission in a Skilled Nursing Facility. N
- 1287 Engl J Med. 2020;382(22):2081–90.
- 1288 15. Rothe C, Schunk M, Sothmann P, Bretzel G, Froeschl G, Wallrauch C, et al.
- 1289 Transmission of 2019-nCoV Infection from an Asymptomatic Contact in Germany. N Engl
- 1290 J Med. 2020;382(10):970–1.
- 1291 16. Daley P, Castriciano S, Chernesky M, Smieja M. Comparison of flocked and rayon swabs
- 1292 for collection of respiratory epithelial cells from uninfected volunteers and symptomatic
- 1293 patients. J Clin Microbiol. 2006;44(6):2265–7.
- 1294 17. Ryan J, Coufal N, Aronson S, Ladt K, Andersen C, Zeller M, et al. 3D printed
- 1295 nasopharyngeal swabs with wrapped rayon fibers developed and validated by SCREEN
- 1296 (San Diego Covid 19 Research Enterprise Network) [Internet]. Protocols.io. 2020. p. 1–9.
- 1297 Available from: <https://dx.doi.org/10.17504/protocols.io.bemxjc7n>
- 1298 18. Harris PA, Taylor R, Thielke R, Payne J, Gonzalez N, Conde JG. Research electronic
- 1299 data capture (REDCap) - A metadata-driven methodology and workflow process for
- 1300 providing translational research informatics support. J Biomed Inform. 2009;42(2):377–
- 1301 81.
- 1302 19. Harris PA, Taylor R, Minor BL, Elliott V, Fernandez M, O’Neal L, et al. The REDCap
- 1303 Consortium: building an international community of software platform partners. J Biomed
- 1304 Inform. 2019;95:103208.
- 1305 20. Sathe S, Mah C, Ahmed N, Ragsac MF, Williams J, Yeo G. INSPECT sample tracking
- 1306 system [Internet]. protocols.io. 2020 [cited 2021 May 26]. p. 1–8. Available from:
- 1307 <https://www.protocols.io/view/inspect-sample-tracking-system-bis8kehww>
- 1308 21. Marotz L, Belda-Ferre P, Zeller M, Anderson C, Morgan SC, Knight R, et al. Semi-
- 1309 Automated Extraction of Viral RNA using the Omega Bio-tek Mag-Bind Viral DNA / RNA
- 1310 96 Kit for SARS- CoV-2 Detection [Internet]. protocols.io. 2021 [cited 2021 May 26]. p. 1–
- 1311 15. Available from: [dx.doi.org/10.17504/protocols.io.brqhm5t6](https://dx.doi.org/10.17504/protocols.io.brqhm5t6)
- 1312 22. De Hoff P, Morgan SC, Laurent LC. Semi-Automated and Miniaturized SARS-CoV-2
- 1313 Detection using TaqPath COVID-19 Multiplex Real-Time RT-PCR Assay [Internet].
- 1314 protocols.io. 2021 [cited 2021 May 26]. p. 1–14. Available from:
- 1315 [dx.doi.org/10.17504/protocols.io.brhvm366](https://dx.doi.org/10.17504/protocols.io.brhvm366)
- 1316 23. Belda-Ferre P, Marotz L, Humphrey G, Morgan SC, Knight R. Semi-Automated Extraction
- 1317 of Viral RNA using the MagMax Viral Pathogen ( MVPII ) 96 Kit for SARS-CoV-2
- 1318 Detection [Internet]. protocols.io. 2021 [cited 2021 May 26]. p. 1–15. Available from:
- 1319 [dx.doi.org/10.17504/protocols.io.brcvm2w6](https://dx.doi.org/10.17504/protocols.io.brcvm2w6)
- 1320 24. Wickham H, Averick M, Bryan J, Chang W, McGowan LD, François R, et al. Welcome to
- 1321 the Tidyverse. J Open Source Softw. 2019;4(43):1686.
- 1322 25. Golemund G, Wickham H. Dates and times made easy with lubridate. J Stat Softw.
- 1323 2011;40(3):1–25.
- 1324 26. Patil I. Visualizations with statistical details: the “ggstatsplot” approach. J Open Source
- 1325 Softw. 2021;6(59):1–10.
- 1326 27. Specht I, Sani K, Botti-Lodovico Y, Hughes M, Heumann K, Bronson A, et al. The Case
- 1327 for Altruism in Institutional Diagnostic Testing. medRxiv [Internet]. 2021;1–18. Available
- 1328 from: <http://medrxiv.org/content/early/2021/03/25/2021.03.16.21253669.abstract>
- 1329 28. Dagan N, Barda N, Kepten E, Miron O, Perchik S, Katz MA, et al. BNT162b2 mRNA
- 1330 Covid-19 Vaccine in a Nationwide Mass Vaccination Setting. N Engl J Med. 2021;1–12.

- 1331 29. Dean N. Hospital admissions due to COVID-19 in Scotland after one dose of vaccine.  
1332 Lancet. 2021;397:1601–3.
- 1333 30. Baggio S, L'Huillier AG, Yerly S, Bellon M, Wagner N, Rohr M, et al. Severe Acute  
1334 Respiratory Syndrome Coronavirus 2 (SARS-CoV-2) Viral Load in the Upper Respiratory  
1335 Tract of Children and Adults With Early Acute Coronavirus Disease 2019 (COVID-19).  
1336 Clin Infect Dis. 2020;1–3.
- 1337 31. Jacot D, Greub G, Jatou K, Opota O. Viral load of SARS-CoV-2 across patients and  
1338 compared to other respiratory viruses. Microbes Infect [Internet]. 2020;22(10):617–21.  
1339 Available from: <https://doi.org/10.1016/j.micinf.2020.08.004>
- 1340 32. Mahallawi WH, Alsamiri AD, Dabbour AF, Alsaedi H, Al-Zalabani AH. Association of  
1341 Viral Load in SARS-CoV-2 Patients With Age and Gender. Front Med. 2021;8:1–5.
- 1342 33. Madera S, Crawford E, Langelier C, Tran NK, Thornborrow E, Miller S, et al.  
1343 Nasopharyngeal SARS-CoV-2 viral loads in young children do not differ significantly from  
1344 those in older children and adults. Sci Rep [Internet]. 2021;11(3044):1–4. Available from:  
1345 <https://doi.org/10.1038/s41598-021-81934-w>
- 1346 34. To KK-W, Tsang OT-Y, Leung W-S, Tam AR, Wu T-C, Lung DC, et al. Temporal profiles  
1347 of viral load in posterior oropharyngeal saliva samples and serum antibody responses  
1348 during infection by SARS-CoV-2: an observational cohort study. Lancet Infect Dis.  
1349 2020;20:565–74.
- 1350 35. Hasanoglu I, Korukluoglu G, Asilturk D, Cosgun Y, Kalem AK, Altas AB, et al. Higher viral  
1351 loads in asymptomatic COVID-19 patients might be the invisible part of the iceberg.  
1352 Infection [Internet]. 2021;49:117–26. Available from: [https://doi.org/10.1007/s15010-020-](https://doi.org/10.1007/s15010-020-01548-8)  
1353 [01548-8](https://doi.org/10.1007/s15010-020-01548-8)
- 1354 36. Heald-Sargent T, Muller WJ, Zheng X, Rippe J, Patel AB, Kociolek LK. Age-related  
1355 differences in nasopharyngeal Severe Acute Respiratory Syndrome Coronavirus 2  
1356 (SARS-CoV-2) levels in patients with mild to moderate Coronavirus Disease 2019  
1357 (COVID-19). JAMA Pediatr. 2020;174(11):902–3.
- 1358 37. Euser S, Aronson S, Manders I, Lelyveld S Van, Herpers B, Sinnige J, et al. SARS-CoV-2  
1359 viral load distribution reveals that viral loads increase with age: a retrospective cross-  
1360 sectional cohort study. medRxiv [Internet]. 2021;1–25. Available from:  
1361 <https://doi.org/10.1101/2021.01.15.21249691>
- 1362 38. Washington NL, Gangavarapu K, Zeller M, Bolze A, Cirulli ET, Schiabor Barrett KM, et al.  
1363 Emergence and rapid transmission of SARS-CoV-2 B.1.1.7 in the United States. med.  
1364 2021;1–19.
- 1365 39. Wang D, Hu B, Hu C, Zhu F, Liu X, Zhang J, et al. Clinical characteristics of 138  
1366 hospitalized patients with 2019 novel coronavirus-infected pneumonia in Wuhan, China. J  
1367 Am Med Assoc. 2020;323(11):1061–9.
- 1368 40. Huang C, Wang Y, Li X, Ren L, Zhao J, Hu Y, et al. Clinical features of patients infected  
1369 with 2019 novel coronavirus in Wuhan, China. Lancet. 2020;395:497–506.
- 1370 41. Chen J, Qi T, Liu L, Ling Y, Qian Z, Li T, et al. Clinical progression of patients with  
1371 COVID-19 in Shanghai, China. J Infect [Internet]. 2020;80:e1–6. Available from:  
1372 <https://doi.org/10.1016/j.jinf.2020.03.004>
- 1373 42. Arentz M, Yim E, Klaff L, Lokhandwala S, Riedo FX, Chong M, et al. Characteristics and  
1374 outcomes of 21 critically ill patients with COVID-19 in Washington state. J Am Med  
1375 Assoc. 2020;323(16):1612–4.
- 1376 43. Qin C, Zhou L, Hu Z, Zhang S, Yang S, Tao Y, et al. Dysregulation of Immune Response  
1377 in Patients With Coronavirus 2019 (COVID-19) in Wuhan, China. Clin Infect Dis.  
1378 2020;71(15):762–8.
- 1379 44. Du Y, Tu L, Zhu P, Mu M, Wang R, Yang P, et al. Clinical features of 85 fatal cases of  
1380 COVID-19 from Wuhan: A retrospective observational study. Am J Respir Crit Care Med.  
1381 2020;201(11):1372–9.

- 1382 45. Liu Y, Yan LM, Wan L, Xiang TX, Le A, Liu JM, et al. Viral dynamics in mild and severe  
1383 cases of COVID-19. *Lancet Infect Dis* [Internet]. 2020;20:656–7. Available from:  
1384 [http://dx.doi.org/10.1016/S1473-3099\(20\)30232-2](http://dx.doi.org/10.1016/S1473-3099(20)30232-2)
- 1385 46. Wang Y, Zhang L, Sang L, Ye F, Ruan S, Zhong B, et al. Kinetics of viral load and  
1386 antibody response in relation to COVID-19 severity. *J Clin Invest*. 2020;130(10):5235–44.
- 1387 47. Greene DN, Jackson ML, Hillyard DR, Delgado JC, Schmidt R. Decreasing median age  
1388 of COVID-19 cases in the United States - changing epidemiology or changing  
1389 surveillance? *PLoS One* [Internet]. 2020;15(10):e0240783. Available from:  
1390 <https://doi.org/10.1101/2020.07.22.20160119>
- 1391 48. Bwire GM. Coronavirus: Why men are more vulnerable to COVID-19 than women? *SN*  
1392 *Compr Clin Med*. 2020;1–3.
- 1393 49. Egede LE. Race, ethnicity, culture, and disparities in health care. *J Gen Intern Med*.  
1394 2006;21(6):667–9.
- 1395 50. Peckham H, de Grijter NM, Raine C, Radziszewska A, Ciurtin C, Wedderburn LR, et al.  
1396 Male sex identified by global COVID-19 meta-analysis as a risk factor for death and ICU  
1397 admission. *Nat Commun* [Internet]. 2020;11(6317):1–10. Available from:  
1398 <http://dx.doi.org/10.1038/s41467-020-19741-6>
- 1399 51. Gil RM, Marcelin JR, Zuniga-Blanco B, Marquez C, Mathew T, Piggott DA. COVID-19  
1400 pandemic: Disparate health impact on the Hispanic/Latinx population in the United  
1401 States. *J Infect Dis*. 2020;222:1592–5.
- 1402 52. Rodriguez-Diaz CE, Guilamo-Ramos V, Mena L, Hall E, Honermann B, Crowley JS, et al.  
1403 Risk for COVID-19 infection and death among Latinos in the United States: examining  
1404 heterogeneity in transmission dynamics. *Ann Epidemiol* [Internet]. 2020;52:1–10.  
1405 Available from: <https://doi.org/10.1016/j.annepidem.2020.07.007>
- 1406 53. DiMaggio C, Klein M, Berry C, Frangos S. Black/African American Communities are at  
1407 highest risk of COVID-19: spatial modeling of New York City ZIP Code-level testing  
1408 results. *Ann Epidemiol* [Internet]. 2020;51:7–13. Available from:  
1409 <https://doi.org/10.1016/j.annepidem.2020.08.012>
- 1410 54. Millett GA, Jones AT, Benkeser D, Baral S, Mercer L, Beyrer C, et al. Assessing  
1411 differential impacts of COVID-19 on black communities. *Ann Epidemiol* [Internet].  
1412 2020;47:37–44. Available from: <https://doi.org/10.1016/j.annepidem.2020.05.003>
- 1413 55. Whittle RS, Diaz-Artiles A. An ecological study of socioeconomic predictors in detection  
1414 of COVID-19 cases across neighborhoods in New York City. *BMC Med*. 2020;18(271):1–  
1415 17.
- 1416 56. van den Berg P, Schechter-Perkins EM, Jack RS, Epshtein I, Nelson R, Oster E, et al.  
1417 Effectiveness of 3 versus 6 ft of physical distancing for controlling spread of Coronavirus  
1418 Disease 2019 among primary and secondary students and staff: A retrospective,  
1419 statewide cohort study. *Clin Infect Dis*. 2021;1–8.

1420  
1421

1422

1423

1424

1425

1426

1427

## Supplemental Figs

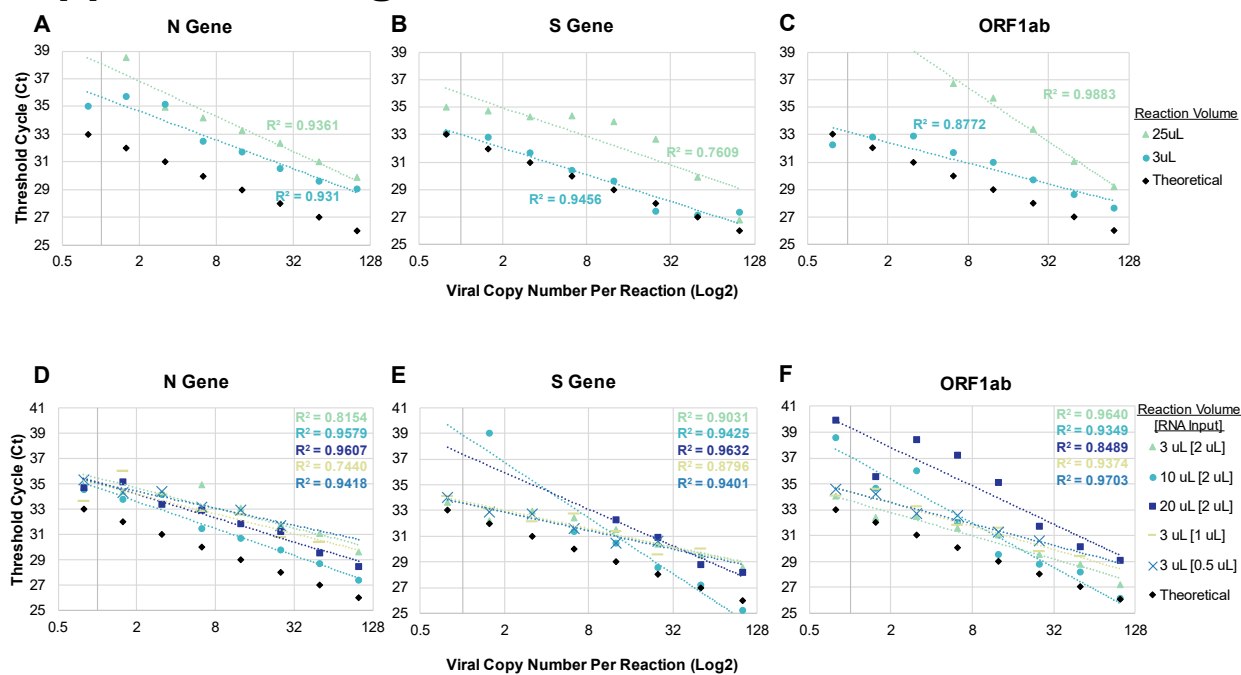

1428

1429

**Fig S1.** (A-C) RT-qPCR performance of miniaturized (3  $\mu$ L) and full-scale (25  $\mu$ L) reactions as compared to theoretical results, for three targeted regions of the SARS-CoV-2 genome: (A) N Gene; (B) S Gene; (C) ORF1ab. (D-F) RT-qPCR performance of different reactions (varied total reaction volume and RNA input volume) as compared to theoretical results, for three targeted

1430

regions of the SARS-CoV-2 genome: (A) N Gene; (B) S Gene; (C) ORF1ab. Every point in each graph represents the average of 3 technical replicates.

1431

1432

1433

1434

1435

1436

1437

1438

1439

1440

1441



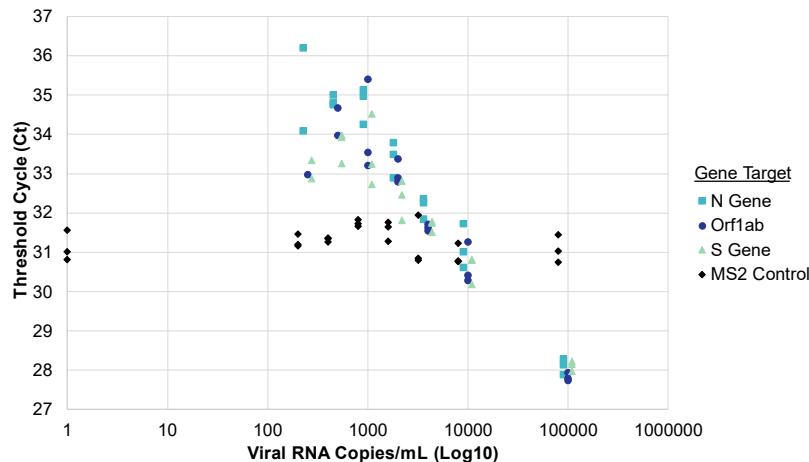

1442  
1443 **Fig S2.** Limit of detection of SARS-CoV-2 viral RNA at different concentrations, with viral RNA  
1444 spiked into negative NP control samples prior to RNA extraction. Each point represents a single  
1445 replicate reaction.  
1446

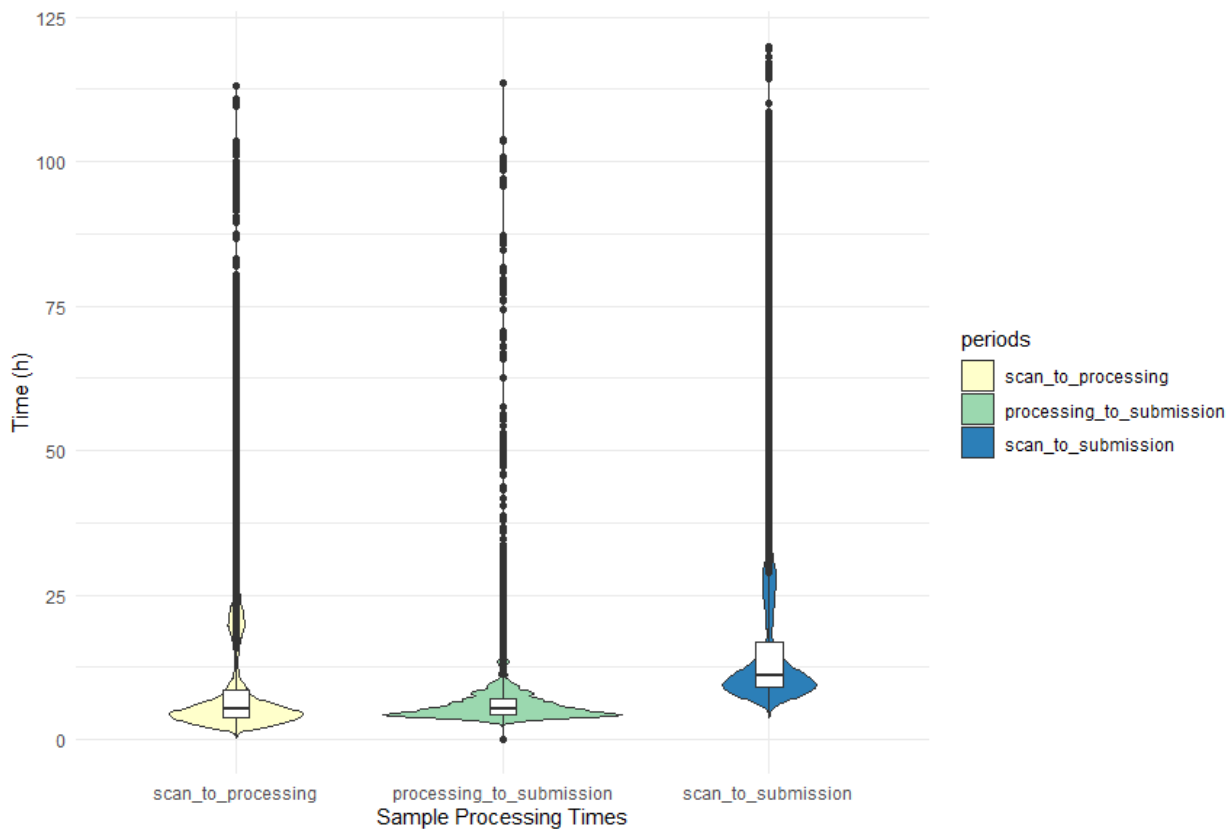

1447  
1448 **Fig S3.** Sample processing times for samples at the EXCITE lab (n = 144,971).  
1449 “Scan\_to\_processing” refers to the time from when a participant scans a tube barcode for self-  
1450 collection to when the sample is received by the EXCITE lab and begins processing.  
1451 “Processing\_to\_submission” refers to the time it takes to process the sample by the EXCITE  
1452 lab, from the time the sample is received to the time the result is returned.  
1453 “Scan\_to\_submission” refers to the sum of the two previous times, the total time it takes to

1454 receive results. Samples that were recorded as taking longer than five days to process were  
1455 considered technical errors and were removed from this plot, along with samples with missing  
1456 data for one or more of the timepoints.

1457

1458

1459

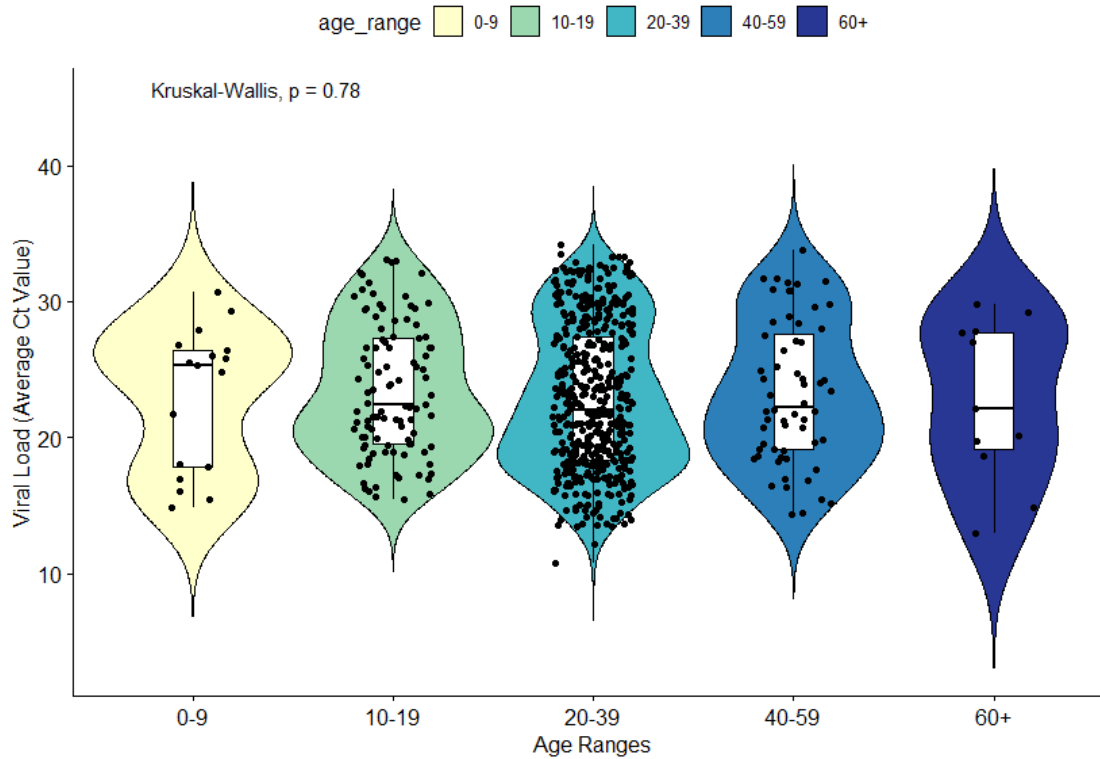

1460

1461 **Fig S4.** Viral load (estimated by average Ct value) of COVID-19 positive individuals, separated  
1462 by age group. A Kruskal-Wallis test indicated no significant difference in viral load among age  
1463 groups ( $p = 0.78$ ).

1464



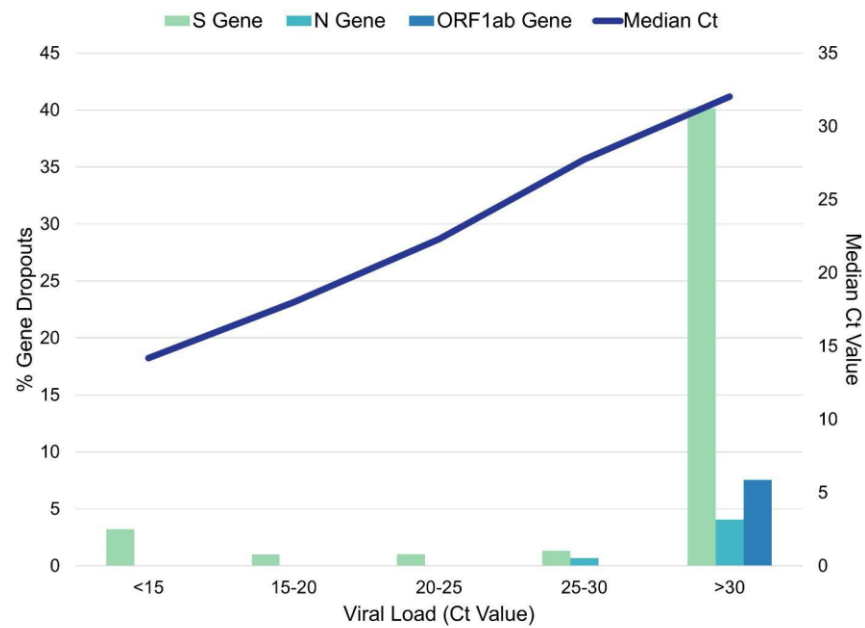

1465  
1466  
1467  
1468  
1469  
1470

**Fig S5.** SARS-CoV-2 viral gene dropouts during RT-qPCR detection as a function of median viral load (Ct value).

**A** Number of times participants were tested (n=6672)

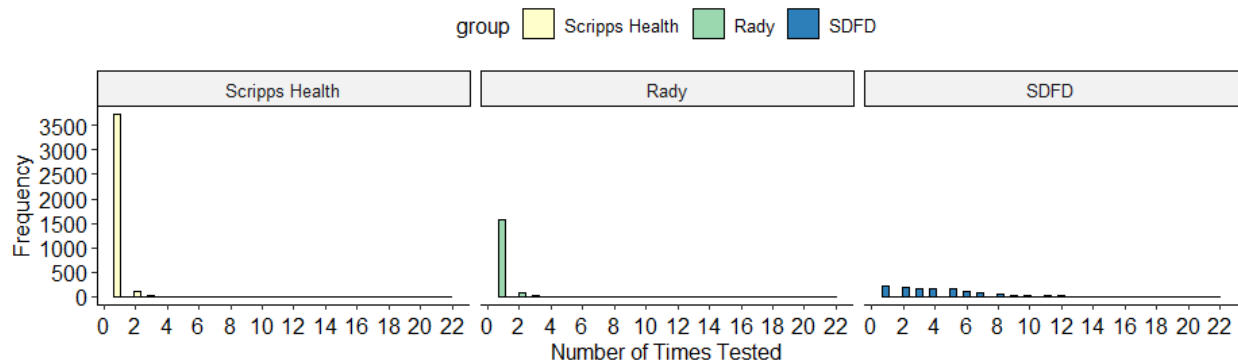

**B** Number of times participants were tested (n=27252)

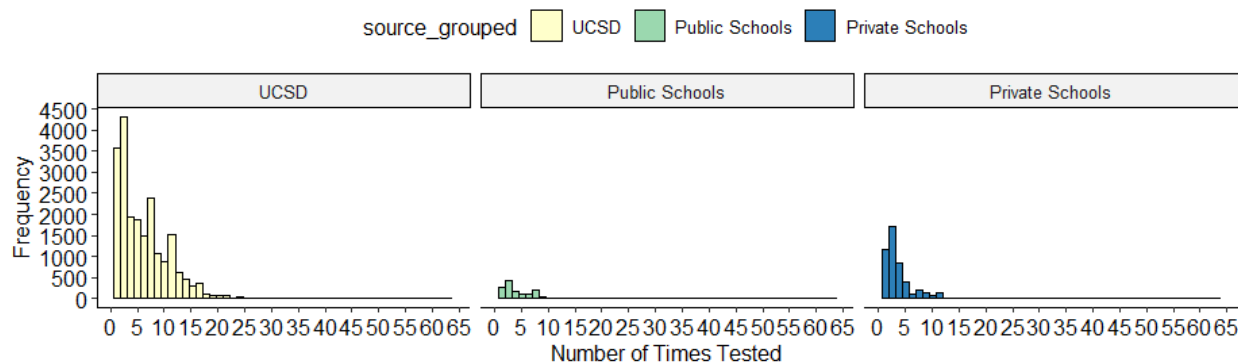

1471  
1472 **Fig S6.** The number of times (A) SEARCH study participants and (B) EXCITE lab participants  
1473 chose to be tested for SARS-CoV-2. Healthcare workers from Scripps Health and Rady systems  
1474 were tested between April 17 and June 30, 2020 via the SEARCH study. Students, faculty, and  
1475 staff from the University of California, San Diego (UCSD) and from public and private schools in  
1476 San Diego County were tested between Sept 15, 2020 and February 5, 2021 via the EXCITE  
1477 lab. San Diego Fire-Rescue Department (SDFD) participants were tested via both the SEARCH  
1478 study and the EXCITE lab during the same timeframes.

1479  
1480

1481

1482

1483

1484

1485

1486

1487

1488

## 1489 Supplemental Tables

1490 **Table S1.** Comparison of 3D-printed and commercially-sourced nasopharyngeal swabs. In total,  
1491 25 pediatric patients and nine adult patients were swabbed to perform the validation of the 3D-  
1492 printed swabs. Of the 25 pediatric samples, 22 were tested using a viral respiratory panel, and  
1493 three were tested using a COVID-19 test. All nine adult samples were COVID-19 positive;  
1494 however, only four had both 3D-printed and commercial swabs.

|                                  | Commercial Swab | 3D-Printed Swab |
|----------------------------------|-----------------|-----------------|
| <b>Pediatric</b>                 |                 |                 |
| Respiratory Viral Panel          |                 |                 |
| Negative                         | 16/16 (100%)    | 16/16 (100%)    |
| Positive (single)                | 3/5 (60%)       | 5/5 (100%)      |
| Positive (multiple)              | 1/1 (100%)      | 1/1 (100%)      |
| COVID-19 negative                | 2/2 (100%)      | 2/2 (100%)      |
| COVID-19 positive                | 1/1 (100%)      | 1/1 (100%)      |
| <b>Adult</b>                     |                 |                 |
| COVID-19 positive (in parallel)  | 2/4 (50%)       | 4/4 (100%)      |
| COVID-19 positive (3D swab only) | Not available   | 5/5 (100%)      |

1495

496  
497  
498  
499  
500  
501

**Table S2.** Technical validation of anterior nares swabs in different media for SARS-CoV-2 detection: PrimeStore® Molecular Transport Medium (MTM media/ANM sample type); Mawi DNA Technologies iSWAB Microbiome buffer (Mawi media/ANW sample type), and 5% sodium dodecyl sulfate (SDS media/AND sample type). Limit of detection for triplicate contrived samples containing different concentrations of viral particles (VP) per mL (250 - 32,000). Rows in bold indicate the limit of detection for that media type. Three SARS-CoV-2 viral genes were targeted for amplification (N gene, Orf1ab, and S gene), as well as an internal control (MS2). A minimum of 2/3 viral gene targets were required to amplify within each replicate to be considered a positive result.

|            | VP/mL      | N Gene          |                 |                 | Orf1ab          |                 |                 | S Gene          |                 |                 | MS2             |                 |                 |
|------------|------------|-----------------|-----------------|-----------------|-----------------|-----------------|-----------------|-----------------|-----------------|-----------------|-----------------|-----------------|-----------------|
|            |            | 1               | 2               | 3               | 1               | 2               | 3               | 1               | 2               | 3               | 1               | 2               | 3               |
| <b>ANM</b> | 32000      | 28.56724        | 27.30496        | 29.05796        | 28.123          | 26.74671        | 28.40087        | 28.23621        | 26.90927        | 28.74655        | 30.88804        | 30.39208        | 31.40189        |
|            | 16000      | 28.59086        | 29.10027        | 30.37453        | 27.87927        | 28.2653         | 29.04837        | 28.28125        | 28.63926        | 30.22964        | 30.47556        | 30.3301         | 32.33632        |
|            | 8000       | 29.622          | 29.6161         | 31.03946        | 28.8252         | 28.9988         | 30.13729        | 29.59232        | 29.40543        | 30.42216        | 30.80075        | 30.81684        | 32.18524        |
|            | 4000       | 30.55292        | 29.34379        | 31.57382        | 29.06067        | 28.92757        | 30.08623        | 30.36565        | 30.0086         | 30.64664        | 30.94963        | 31.10299        | 32.24866        |
|            | 2000       | 29.79179        | 30.78633        | 32.3596         | 29.65664        | 29.51823        | 30.53481        | 30.80253        | 30.60761        | 32.05163        | 30.91378        | 30.87834        | 32.21166        |
|            | 1000       | 31.95534        | 31.63872        | 32.23191        | 30.48554        | 30.74818        | 31.60106        | 31.6986         | 30.66024        | 31.82981        | 31.09695        | 30.54766        | 31.51518        |
|            | <b>500</b> | <b>31.8007</b>  | <b>32.17833</b> | <b>32.93955</b> | <b>31.25087</b> | <b>30.67037</b> |                 | <b>31.43116</b> | <b>31.69549</b> | <b>32.06826</b> | <b>31.05981</b> | <b>31.16852</b> | <b>31.70178</b> |
|            | 250        | 32.91542        | 32.62193        |                 | 31.56975        | 31.78306        | 32.0334         | 32.01559        | 31.93159        |                 | 30.60415        | 30.89187        | 32.10643        |
| <b>ANW</b> | 32000      | 27.6949         | 27.62062        | 28.6829         | 26.75763        | 27.07014        | 27.86881        | 27.33813        | 27.60611        | 28.84602        | 29.7765         | 29.94439        | 30.21699        |
|            | 16000      | 27.77016        | 27.98963        | 30.38937        | 27.51569        | 27.56042        | 28.88784        | 28.21654        | 28.12109        | 29.61706        | 30.10374        | 30.00491        | 30.40088        |
|            | 8000       | 29.58683        | 28.77404        | 29.10565        | 28.46152        | 28.83664        | 28.64296        | 29.12567        | 29.02891        | 29.54257        | 30.49041        | 30.77581        | 30.56796        |
|            | 4000       | 30.67838        | 30.55936        | 30.49048        | 28.79253        | 29.14261        | 29.4781         | 30.15295        | 29.68094        | 29.89257        | 30.60305        | 30.637          | 30.54589        |
|            | 2000       | 30.89805        | 31.18324        | 32.13199        | 30.06639        | 29.95144        | 30.58552        | 31.16762        | 30.60806        | 31.78862        | 30.70745        | 30.53986        | 31.03023        |
|            | 1000       | 30.69853        | 31.70212        | 33.70245        | 30.83089        | 31.16146        | 31.39502        | 31.41211        | 31.37258        | 32.74824        | 30.87244        | 30.66293        | 31.0696         |
|            | 500        | 33.08861        | 32.74819        | 33.7467         | 31.24067        | 31.50742        | 32.27259        | 32.32956        | 31.97728        | 32.70442        | 30.81637        | 30.69168        | 31.30658        |
|            | <b>250</b> | <b>32.69856</b> |                 | <b>33.85752</b> | <b>31.97604</b> | <b>31.24246</b> | <b>32.41334</b> | <b>31.77786</b> | <b>31.17495</b> |                 | <b>30.5527</b>  | <b>30.24898</b> | <b>30.31604</b> |
| <b>AND</b> | 32000      | 26.56684        | 26.48251        | 26.43064        | 26.01545        | 25.92576        | 25.85998        | 26.34711        | 26.31556        | 26.20625        | 30.40321        | 30.30017        | 30.44547        |
|            | 16000      | 27.63647        | 27.65226        | 27.66501        | 26.83035        | 26.90872        | 27.02284        | 27.21644        | 27.42337        | 27.63582        | 30.42951        | 30.16785        | 30.07215        |
|            | 8000       | 28.48938        | 28.46131        | 28.30104        | 27.79799        | 27.74197        | 27.61454        | 27.76735        | 28.23767        | 27.80854        | 30.27699        | 30.45726        | 30.03353        |
|            | 4000       | 28.95999        | 28.80925        | 28.81392        | 28.00529        | 28.47926        | 28.04047        | 28.37351        | 28.91348        | 28.77715        | 30.12698        | 30.34609        | 29.99662        |
|            | 2000       | 30.77094        | 30.59611        | 29.90652        | 29.35722        | 29.33499        | 29.5718         | 29.733          | 29.9439         | 29.90099        | 30.43141        | 30.74416        | 30.84527        |
|            | 1000       | 30.85673        | 30.78722        | 31.12153        | 29.11394        | 29.77203        | 29.98141        | 29.87768        | 29.8279         | 30.48528        | 30.46241        | 30.82404        | 30.39688        |
|            | 500        | 31.41748        | 32.30139        | 31.82398        | 29.82488        | 30.51586        | 30.76725        | 30.77686        | 30.89876        | 30.61647        | 30.47791        | 30.87041        | 30.89983        |
|            | <b>250</b> | <b>32.77331</b> | <b>33.0288</b>  | <b>32.94244</b> | <b>29.98244</b> | <b>30.56765</b> | <b>30.93435</b> | <b>31.60111</b> | <b>31.51474</b> | <b>31.75622</b> | <b>30.88731</b> | <b>30.77039</b> | <b>30.52082</b> |

502  
503

504  
505  
506  
507  
508  
509

**Table S3.** Technical validation of anterior nares swabs in different media for SARS-CoV-2 detection: PrimeStore® Molecular Transport Medium (MTM media/ANM sample type); Mawi DNA Technologies iSWAB Microbiome buffer (Mawi media/ANW sample type), and 5% sodium dodecyl sulfate (SDS media/AND sample type). A minimum of 20 contrived samples all containing the same concentration of viral particles (1000 VP/mL) were tested for each media type. Three SARS-CoV-2 viral genes were targeted for amplification (N gene, Orf1ab, and S gene), as well as an internal control (MS2). A minimum of 2/3 viral gene targets were required to amplify within each replicate to be considered a positive result, and a minimum of 19/20 samples were required to return a positive result for this technical validation step.

|              | ANM      |          |          |          | ANW    |          |          |          | AND      |          |          |          |
|--------------|----------|----------|----------|----------|--------|----------|----------|----------|----------|----------|----------|----------|
|              | N Gene   | Orf1ab   | S Gene   | MS2      | N Gene | Orf1ab   | S Gene   | MS2      | N Gene   | Orf1ab   | S Gene   | MS2      |
| Replicate 1  | 33.20503 | 31.2742  | 33.32748 | 32.13901 | 32.328 | 29.96588 | 31.68405 | 30.2813  | 30.36313 | 28.84117 | 29.74154 | 29.97011 |
| Replicate 2  | 33.11781 | 31.22991 | 31.90709 | 31.49288 | 32.665 | 30.83412 | 32.83377 | 30.47811 | 30.81601 | 30.43513 | 30.74937 | 30.34116 |
| Replicate 3  | 32.15603 | 30.20218 | 31.47673 | 31.44101 | 33.419 | 30.95764 | 31.92202 | 30.8268  | 31.02649 | 30.16447 | 30.39575 | 30.27942 |
| Replicate 4  | 32.12903 | 30.85151 | 31.2922  | 31.45474 | 33.009 | 30.14325 | 31.71588 | 30.55374 | 31.50233 | 30.96156 | 30.56672 | 30.63448 |
| Replicate 5  | 32.66456 | 30.69429 | 31.49954 | 31.66452 | 33.065 | 30.48087 | 32.26574 | 30.59831 | 30.90308 | 29.73466 | 29.95023 | 29.85332 |
| Replicate 6  |          | 30.76613 | 31.83545 | 31.09046 |        |          | 32.32624 | 30.43625 | 30.81576 | 29.68443 | 29.94711 | 29.85306 |
| Replicate 7  | 31.54116 | 30.99806 | 30.75484 | 31.44883 | 31.949 | 30.05961 | 31.15406 | 30.01067 | 31.22313 | 28.91922 | 29.96547 | 30.3383  |
| Replicate 8  | 31.26402 | 30.47032 | 30.82045 | 31.08399 | 30.934 | 30.81955 | 30.36134 | 29.98146 | 31.09156 | 29.31754 | 30.72157 | 30.03009 |
| Replicate 9  | 31.64176 | 30.93807 | 30.8849  | 30.83263 | 31.736 | 31.03576 | 31.92403 | 30.77339 | 31.06431 | 30.29006 | 30.41665 | 30.08424 |
| Replicate 10 | 32.00396 | 31.02591 | 31.52836 | 31.55012 | 33.078 | 30.57624 | 31.86759 | 30.87953 | 30.85805 | 30.70002 | 30.23393 | 30.21832 |
| Replicate 11 | 32.84344 | 30.4075  | 31.35707 | 31.26224 | 33.776 | 30.80046 | 31.88817 | 30.70583 | 30.83426 | 30.12243 | 30.41913 | 30.12273 |
| Replicate 12 | 31.63306 | 30.15641 | 31.23138 | 31.56804 | 32.900 | 30.88295 | 31.94054 | 31.03309 | 31.44029 | 30.38277 | 30.81528 | 30.20662 |
| Replicate 13 | 31.4435  | 30.99032 | 30.90512 | 31.36599 | 32.569 | 30.44113 | 32.60187 | 30.92437 | 30.65612 | 30.03494 | 29.91626 | 29.9131  |
| Replicate 14 | 31.06826 | 30.82614 | 30.56917 | 30.77931 | 33.554 | 31.75565 | 32.11547 | 30.57389 | 30.29833 | 29.73377 | 29.77454 | 29.81347 |
| Replicate 15 | 31.12846 | 30.33739 | 30.75388 | 30.90927 | 31.823 | 30.77881 | 30.93723 | 30.43053 | 31.29008 | 28.71616 | 30.271   | 29.92114 |
| Replicate 16 | 32.10682 | 30.81051 | 31.40603 | 30.78367 | 33.312 | 30.96995 | 31.25103 | 30.42333 | 30.91602 | 29.76852 | 29.95509 | 31.00376 |
| Replicate 17 | 31.30213 | 30.68539 | 31.46759 | 30.47551 | 32.177 | 30.40417 | 32.03503 | 31.32467 | 30.81853 | 30.25693 | 30.90988 | 30.38307 |
| Replicate 18 | 31.28477 | 30.36862 | 30.79565 | 30.63984 | 32.393 | 30.88316 | 31.48466 | 31.36795 | 30.81384 | 29.5703  | 30.3437  | 30.28908 |
| Replicate 19 | 31.48638 | 30.27696 | 30.66186 | 30.81963 | 32.470 | 30.78672 | 31.53987 | 31.22123 | 30.9675  | 30.30584 | 30.77847 | 29.92241 |
| Replicate 20 | 30.9396  | 30.73603 |          | 30.78493 | 32.968 | 30.75034 | 31.76518 | 31.39022 | 30.77984 | 29.19349 | 30.61045 | 30.16572 |
| Replicate 21 | N/A      | N/A      | N/A      | N/A      | N/A    | N/A      | N/A      | N/A      | 31.18732 | 30.29526 | 30.71653 | 30.28227 |
| Replicate 22 | N/A      | N/A      | N/A      | N/A      | N/A    | N/A      | N/A      | N/A      | 31.24267 | 30.011   | 30.23237 | 30.0241  |

510  
511  
512  
513

514  
515  
516  
517  
518  
519  
520  
521  
522  
523

**Table S4.** Clinical validation of anterior nares swabs in different media for SARS-CoV-2 detection: PrimeStore® Molecular Transport Medium (MTM media/ANM sample type); Mawi DNA Technologies iSWAB Microbiome buffer (Mawi media/ANW sample type), and 5% sodium dodecyl sulfate (SDS media/AND sample type). A minimum of 30 positive and 30 negative clinical samples were tested for each media type. Clinical validation involved testing each sample twice, once using the experimental test to be validated and once with an FDA Emergency Use Authorization (EUA) validated comparator. For ANM validation, the comparator was an EUA-authorized test developed by Helix LLC that also used MTM media; for ANW and AND validation, the newly-validated ANM test was used as the comparator. Three SARS-CoV-2 viral genes were targeted for amplification (N gene, Orf1ab, and S gene), as well as an internal control (MS2). A minimum of 2/3 viral gene targets were required to amplify within each replicate to be considered a positive result, and a minimum 90% sensitivity/specificity (positive/negative agreement between samples tested with the experimental and comparator tests, respectively) was required for clinical validation. Numbers in brackets represent 95% confidence intervals.

|                            | ANM                |          | ANW                |          | AND                    |          |
|----------------------------|--------------------|----------|--------------------|----------|------------------------|----------|
|                            | Positive           | Negative | Positive           | Negative | Positive               | Negative |
| <b>Comparator Positive</b> | 30                 | 0        | 32                 | 0        | 35                     | 2        |
| <b>Comparator Negative</b> | 0                  | 32       | 0                  | 54       | 0                      | 54       |
| <b>Sensitivity</b>         | 100% (88.43 - 100) |          | 100% (89.11 - 100) |          | 94.59% (81.81 - 99.34) |          |
| <b>Specificity</b>         | 100% (89.11 - 100) |          | 100% (93.40 - 100) |          | 100% (93.40 - 100)     |          |
| <b>Accuracy</b>            | 100% (94.22 - 100) |          | 100% (95.80 - 100) |          | 97.80% (92.29 - 99.73) |          |

524  
525

**Table S5.** Private school partners - health and safety modifications for in-person learning.

| School_ID                                 | School 01                                                    | School 02 | School 03                                             | School 04                                                                                                                           | School 05                                                                                                                  | School 06                                                                                                           | School 07                                                                                                          | School 08                                                                                                      | School 09                                                                                                             | School 10                                                                                                                               | School 11                                                                                                                                                           |
|-------------------------------------------|--------------------------------------------------------------|-----------|-------------------------------------------------------|-------------------------------------------------------------------------------------------------------------------------------------|----------------------------------------------------------------------------------------------------------------------------|---------------------------------------------------------------------------------------------------------------------|--------------------------------------------------------------------------------------------------------------------|----------------------------------------------------------------------------------------------------------------|-----------------------------------------------------------------------------------------------------------------------|-----------------------------------------------------------------------------------------------------------------------------------------|---------------------------------------------------------------------------------------------------------------------------------------------------------------------|
| <b>Students</b>                           | 750                                                          | 219       | 124                                                   | 1300                                                                                                                                | 261                                                                                                                        | 1118                                                                                                                | 620                                                                                                                | 349                                                                                                            | 800                                                                                                                   | 110                                                                                                                                     | 169                                                                                                                                                                 |
| <b>Staff</b>                              | 100                                                          | no data   | 33                                                    | 410                                                                                                                                 | 65                                                                                                                         | 250                                                                                                                 | 150                                                                                                                | 85                                                                                                             | 200                                                                                                                   | 18                                                                                                                                      | 39                                                                                                                                                                  |
| <b>Total # Tests</b>                      | 394                                                          | 203       | 438                                                   | 1761                                                                                                                                | 212                                                                                                                        | 4723                                                                                                                | 2066                                                                                                               | 3212                                                                                                           | 2772                                                                                                                  | 53                                                                                                                                      | 519                                                                                                                                                                 |
| <b>Overall Test Positivity (%)</b>        | 0.51                                                         | 1.97      | 0.91                                                  | 0.23                                                                                                                                | 0.94                                                                                                                       | 0.55                                                                                                                | 0.15                                                                                                               | 0.25                                                                                                           | 0.36                                                                                                                  | 0                                                                                                                                       | 0.39                                                                                                                                                                |
| <b>Date In-Person Instruction Resumed</b> | 2020-09-01                                                   | no data   | 2020-09-08                                            | 2020-09-07                                                                                                                          | 2020-09-01                                                                                                                 | 2020-09-02                                                                                                          | 2020-09-07                                                                                                         | 2020-08-28                                                                                                     | 2020-09-02                                                                                                            | 2020-10-16                                                                                                                              | 2020-09-14                                                                                                                                                          |
| <b>Student Testing Plan</b>               | Upon return from breaks, when there is an exposure on campus | no data   | Upon return from breaks, as parents choose to utilize | Testing once a month for lower school students, twice monthly for middle school/high school students, special program for athletics | Asymptomatic, surveillance testing of roughly 1/2 the elementary students each week. All after breaks of a week or longer. | 1/3 of the campus (students/staff) every week, test whole community after breaks such as Thanksgiving and Christmas | Testing in accordance with California Dept. of Public Health recommendations (frequency determined by County tier) | Testing all staff and students every week for December and January, reassess in late January for February plan | 10% tested each month. Greater percentage following breaks. (Entire student body encouraged to test following breaks) | Asymptomatic testing - all students - once before returning from Winter Break in January future testing of asymptomatic students is TBD | Testing entire school community upon return from breaks and if there is a potential exposure on campus. Testing offered to students that may have been exposed, are |

|                                      |                                                                                                      |         |                                                     |                                                              |                                                                                                                                                                                                                   |                                                                                                                     |                                                                                  |                                                                                                                |                                                                                               |                                                                                                                                                                                                                                                                                   |                                                                                                                                               |
|--------------------------------------|------------------------------------------------------------------------------------------------------|---------|-----------------------------------------------------|--------------------------------------------------------------|-------------------------------------------------------------------------------------------------------------------------------------------------------------------------------------------------------------------|---------------------------------------------------------------------------------------------------------------------|----------------------------------------------------------------------------------|----------------------------------------------------------------------------------------------------------------|-----------------------------------------------------------------------------------------------|-----------------------------------------------------------------------------------------------------------------------------------------------------------------------------------------------------------------------------------------------------------------------------------|-----------------------------------------------------------------------------------------------------------------------------------------------|
|                                      |                                                                                                      |         |                                                     |                                                              |                                                                                                                                                                                                                   |                                                                                                                     |                                                                                  |                                                                                                                |                                                                                               |                                                                                                                                                                                                                                                                                   | participating in outside club cohorts, and/or who have been randomly selected each week (approximately 30 tests per week).                    |
| <b>Staff Testing Plan</b>            | Every 2 weeks, as requested, also offered if exposure on campus                                      | no data | Monthly, usually coincides with return from a break | Weekly                                                       | Every 2 weeks                                                                                                                                                                                                     | 1/3 of the campus (students/staff) every week, test whole community after breaks such as Thanksgiving and Christmas | Weekly                                                                           | Testing all staff and students every week for December and January, reassess in late January for February plan | Weekly                                                                                        | Twice a month                                                                                                                                                                                                                                                                     | Testing entire school community upon return from breaks and if there is a potential exposure. Testing staff every two weeks and as requested. |
| <b>Instruction Model</b>             | 50% of students on campus each day. Starting Mid-March we will bring all students back 4 days a week | no data | no data                                             | In person, a/b cohort for MS and US. LS A/B on campus daily. | In person, full-day, students move to outdoor classrooms several times throughout each day. Families can opt for virtual learning (approx 10%). Students can join virtual learning if in quarantine or isolation. | In person, students could opt for elearning but there is no hybrid option, approximately 135 e learning             | Three of six grades on campus (50%); families have option to remain fully remote | 1/3 of student body in person each day.                                                                        | on campus is offered to all students, parents have the option to choose hybrid or 100% remote | We are offering a full day (9am-3pm) on-campus program daily for all students. 85% of students are on-campus for instruction; 15% have selected our at-home option. Teachers are teaching concurrent classes using hybrid Owls and Zoom to broadcast classes to at-home learners. |                                                                                                                                               |
| <b>Classroom Size &amp; Location</b> | Various indoor and outdoor options.                                                                  | no data | no data                                             | 12-16 in a class depending on room size, LS, 12 per class.   | 11-16 per class depending on room size                                                                                                                                                                            | varies by division 12-20                                                                                            | Various indoor and outdoor options.                                              |                                                                                                                | Various indoor and outdoor options.                                                           | varies from 9 to 14 stable groups, outside classroom                                                                                                                                                                                                                              | Various indoor and outdoor options                                                                                                            |



|                                      |                                                                                                                                                   |         |         |                                                                                                                                                                                                                     |                                                                                                                                                                        |                                                                                                                                                                                                                            |                                                                                                                                                   |                                                                             |                                                                                                                                                   |                                                                                                                                                                                                                    |                                                                                                                                                                                 |
|--------------------------------------|---------------------------------------------------------------------------------------------------------------------------------------------------|---------|---------|---------------------------------------------------------------------------------------------------------------------------------------------------------------------------------------------------------------------|------------------------------------------------------------------------------------------------------------------------------------------------------------------------|----------------------------------------------------------------------------------------------------------------------------------------------------------------------------------------------------------------------------|---------------------------------------------------------------------------------------------------------------------------------------------------|-----------------------------------------------------------------------------|---------------------------------------------------------------------------------------------------------------------------------------------------|--------------------------------------------------------------------------------------------------------------------------------------------------------------------------------------------------------------------|---------------------------------------------------------------------------------------------------------------------------------------------------------------------------------|
|                                      |                                                                                                                                                   |         |         |                                                                                                                                                                                                                     |                                                                                                                                                                        |                                                                                                                                                                                                                            |                                                                                                                                                   |                                                                             |                                                                                                                                                   | tents is primary location                                                                                                                                                                                          |                                                                                                                                                                                 |
| <b>Other Safety Procedures</b>       | Screening, masks, increased distance, air filters, improved HVAC filters, grab and go lunch, lower density in classrooms, outdoor performing arts | no data | no data | Utilized "Health and Safety FIRST" protocol for general safety (Face masks / Ill? Stay at home / Remove germs / Six feet apart / Temperature check). Also used Eموcha health-screening app used to report symptoms. | physical distance, masks, symptom screening, ventilation, outdoor learning, staggered arrival, stable groups, modified on-campus movement (not all apply to preschool) | Health Screen, Mandatory masks, increased distance seating, outdoor classrooms, no more than 45 at time in indoor classroom, CO2 sensors, fans, air filters, Daily disinfecting procedures. staggered drop off and pick up | Screening, masks, increased distance, air filters, improved HVAC filters, grab and go lunch, lower density in classrooms, outdoor performing arts | Screening, masks, increased distance, air filters, lower density classrooms | Screening, masks, increased distance, air filters, improved HVAC filters, grab and go lunch, lower density in classrooms, outdoor performing arts | staggered arrival and dismissal, morning screenings, masks for all, increased physical distancing, outside instruction for the majority of the time, air purifiers, handwashing stations in each outdoor classroom | Screening, mandatory masks, increased distance, air filters, improved HVAC filters, increased hand washing stations, more outdoor classrooms, increased cleaning and sanitation |
| <b>Face Covering Requirements</b>    | Masks required for everyone while on campus. Teachers are offered disposable surgical masks.                                                      | no data | no data | Required at all times for students and faculty. Staff may remove if in a private office.                                                                                                                            | Masks required at all times except eating for everyone ages 3 and up                                                                                                   | Masks required, all ages, at all times except eating and naptime                                                                                                                                                           | no data                                                                                                                                           | no data                                                                     | no data                                                                                                                                           | Required for all                                                                                                                                                                                                   | Masks required at all times (except for lunch where students are socially distanced)                                                                                            |
| <b>Minimum Spacing Between Desks</b> | 6 feet (1.8 m)                                                                                                                                    | no data | no data | 6 feet (1.8 m)                                                                                                                                                                                                      | 6 feet (1.8 m) for elementary students                                                                                                                                 | 4-6 feet (1.2-1.8 m)                                                                                                                                                                                                       | no data                                                                                                                                           | no data                                                                     | no data                                                                                                                                           | 5-6 feet (1.5-1.8 m)                                                                                                                                                                                               | 6 feet (1.8 m)                                                                                                                                                                  |
| <b>HVAC Modifications</b>            | UV-C disinfecting lamps on the supply end of HVAC                                                                                                 | no data | no data | Upgraded HVAC air filters, portable air purifiers                                                                                                                                                                   | Increased air filter to M13-grade, added UV                                                                                                                            | Portable HEPA systems                                                                                                                                                                                                      | no data                                                                                                                                           | no data                                                                     | no data                                                                                                                                           | Upgraded HVAC air filters, portable air purifiers                                                                                                                                                                  | Upgraded air filtration systems to M13-grade, added portable HEPA systems and fans                                                                                              |
| <b>Indoor/Outdoor Instruction</b>    | no data                                                                                                                                           | no data | no data | Indoor with max ventilation at all times.                                                                                                                                                                           | Both indoor and outdoor, alternating throughout the day                                                                                                                | CO2 monitors with mandatory outside time if >700 ppm. At least 15 minutes outdoor time per hour. All eating is outdoors.                                                                                                   | no data                                                                                                                                           | no data                                                                     | no data                                                                                                                                           | Fully functioning outdoor classroom tents with TV monitors, white boards, doc cam and battery power, indoor is permitted but                                                                                       | CO2 monitors with mandatory outside time; most classes are conducted outdoors for at least 50% time                                                                             |

|                                                     |                                                                                                                  |         |         |                                                                                                             |                                                                                 |                                                            |         |         |         |                                                                                                                                                                  |                                                                                                                           |
|-----------------------------------------------------|------------------------------------------------------------------------------------------------------------------|---------|---------|-------------------------------------------------------------------------------------------------------------|---------------------------------------------------------------------------------|------------------------------------------------------------|---------|---------|---------|------------------------------------------------------------------------------------------------------------------------------------------------------------------|---------------------------------------------------------------------------------------------------------------------------|
|                                                     |                                                                                                                  |         |         |                                                                                                             |                                                                                 |                                                            |         |         |         | encouraged to be very little time                                                                                                                                |                                                                                                                           |
| <b>Cohort Size</b>                                  | no data                                                                                                          | no data | no data | Currently 12                                                                                                | Each grade level (approx 25-30 students)                                        | Elementary: classroom. Middle and High School: grade level | no data | no data | no data | 9 to 14                                                                                                                                                          | Each grade level                                                                                                          |
| <b>Cleaning</b>                                     | Regular disinfecting of high touch areas throughout the day, nightly electrostatic disinfecting of entire campus | no data | no data | Circulating, 3x and after room use.                                                                         | Day porter added to disinfect surfaces in classrooms while students are outside | Cleaning service, including electrostatic sanitization     | no data | no data | no data | Daily janitorial service, recess PE/equipment sprayed with disinfectant after each use; teachers instructed to wipe down surfaces if rotating between classrooms | Regular disinfection of high touch surfaces; nightly disinfection; janitorial service daily                               |
| <b>Symptom Screening</b>                            | Yes - upon entry to campus using the SchoolPass wellness app                                                     | no data | no data | Yes - using Emocho                                                                                          | Yes - using ProCare app                                                         | Yes - Using commercial app. Checked at arrival             | no data | no data | no data | Yes - parents and staff fill out screening app each morning                                                                                                      | Yes - daily using in-house proprietary check-in system                                                                    |
| <b>Temperature Checks</b>                           | Yes - through the SchoolPass app and again as they enter campus                                                  | no data | no data | Yes - part of Emocho and staff at gate                                                                      | Yes - at arrival at school for all                                              | Yes - checked at arrival to school                         | no data | no data | no data | Yes - checked at arrival gate                                                                                                                                    | Yes - through daily health check-in. Students that have not yet checked in are screened prior to entering campus.         |
| <b>Result Notification for Positive Tests</b>       | Yes - by Phone call and email                                                                                    | no data | no data | Yes - by School Nurse                                                                                       | Yes - by school nurse/Pandemic Coordinator                                      | Yes - By athletic trainer                                  | no data | no data | no data | Yes - by Director of Operations                                                                                                                                  | Yes - by Phone call and e-mail                                                                                            |
| <b>Result Notification for Negative Tests</b>       | Yes - by email                                                                                                   | no data | no data | No                                                                                                          | No                                                                              | No                                                         | no data | no data | no data | Yes - by Director of Operations                                                                                                                                  | Yes - by E-mail                                                                                                           |
| <b>Contact Tracing, Isolation, &amp; Quarantine</b> | Conducted in partnership with the school nurse and San Diego County                                              | no data | no data | Conducted by school nurse and team of support with Director of Security and Environmental Health and Safety | Conducted by school nurse/Head of School/Assistant Head of School               | By athletic trainer according to CDC guidelines            | no data | no data | no data | Conducted by Director of Operations, Head of School, Administrative Assistant                                                                                    | Conducted by Principal, who is the lead with all testing, result notification, contact tracing, isolation, and quarantine |
